# Supplementary material for: RNA-seq analysis of hepatic gene expression of common Pekin, Muscovy, mule and hinny ducks fed ad libitum or overfed
Source: PubMed Central journal article supplement (PMC6323773; doi:10.1186/s12864-018-5415-1), 2019-01-07

Cluster 2 (108 GO terms): Organic acid metabolic process

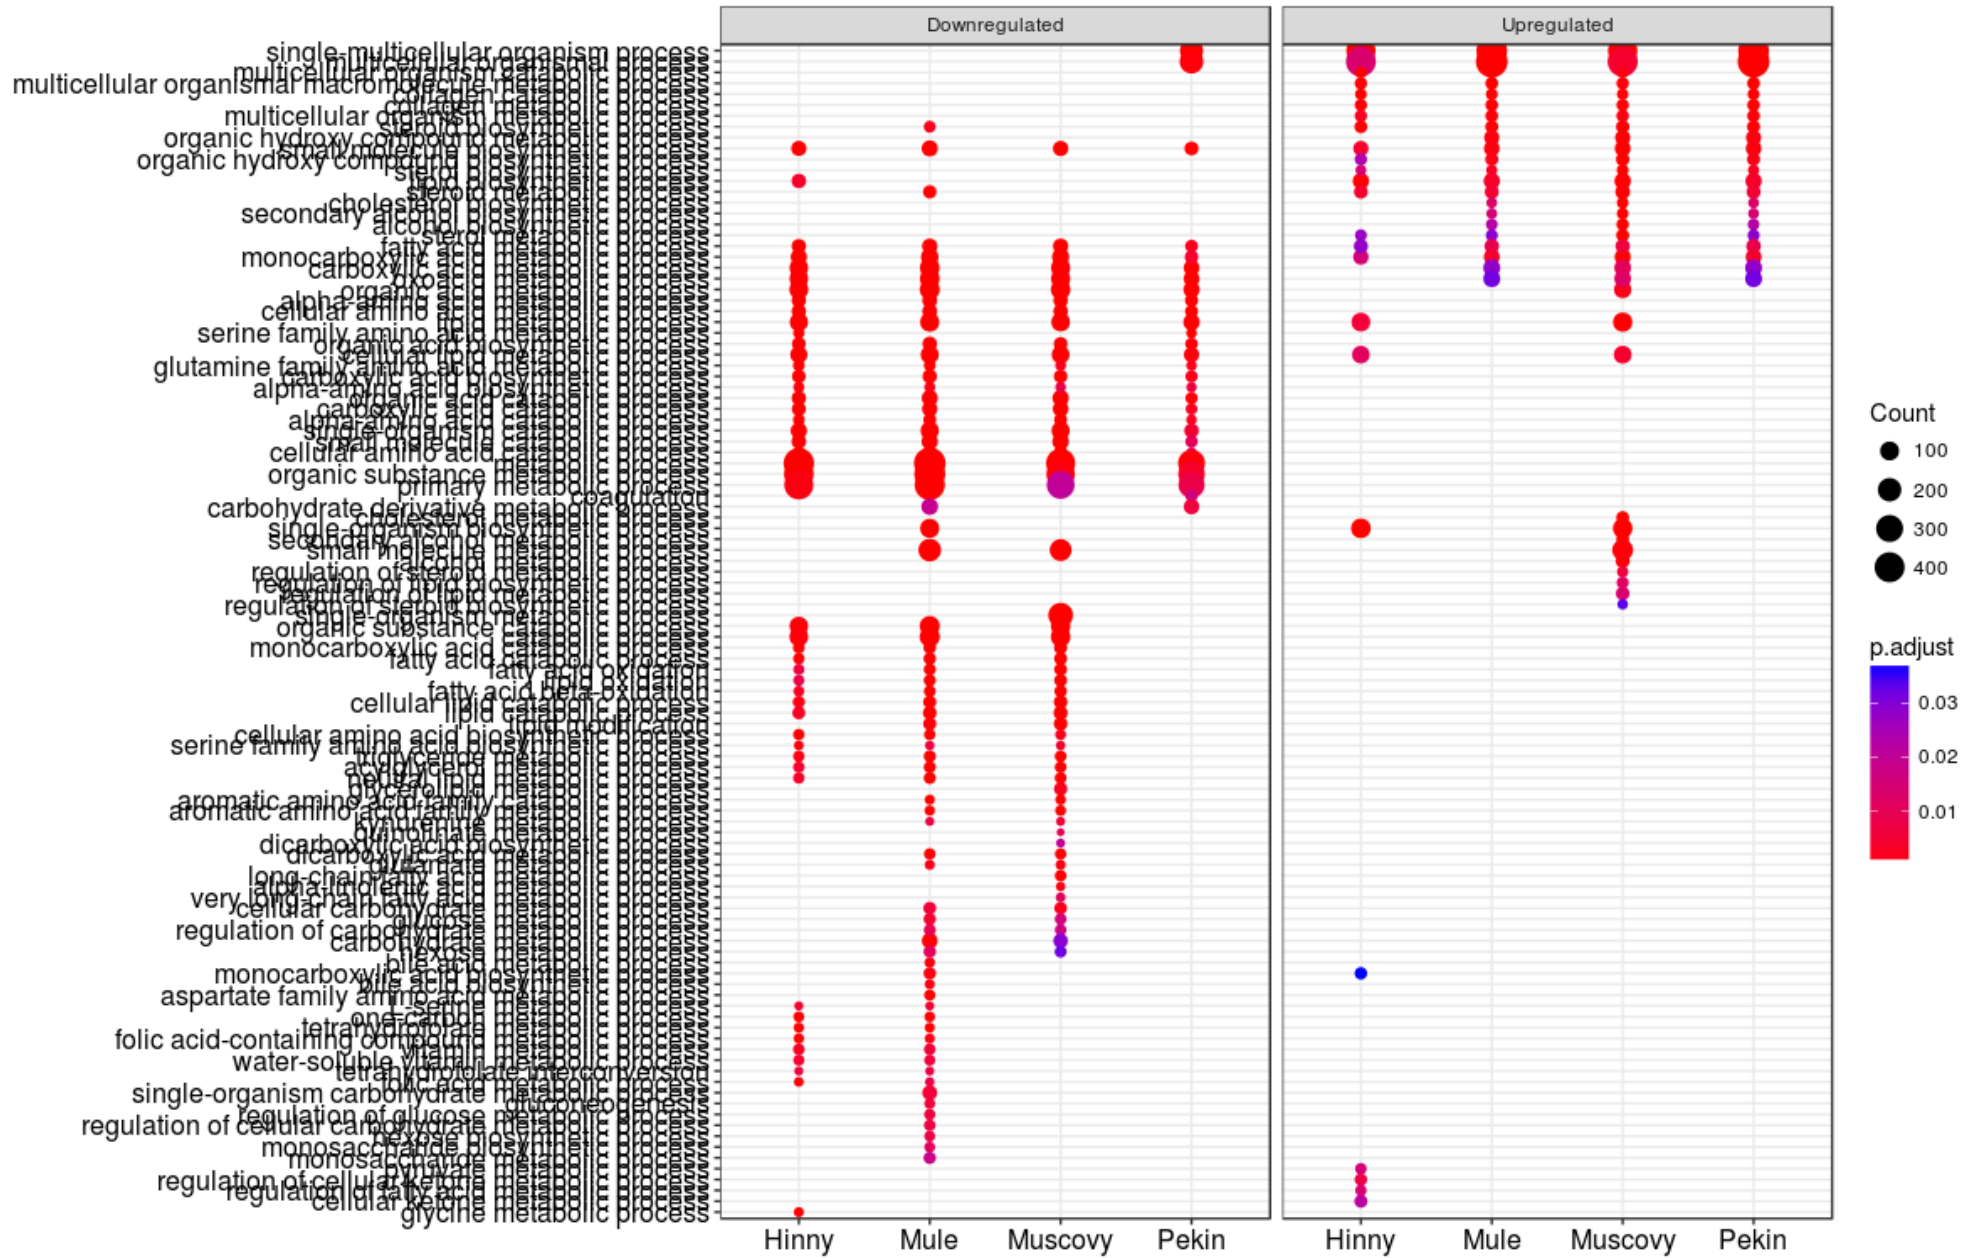

Cluster 3 (83 GO terms), part 1: Anatomical structure development

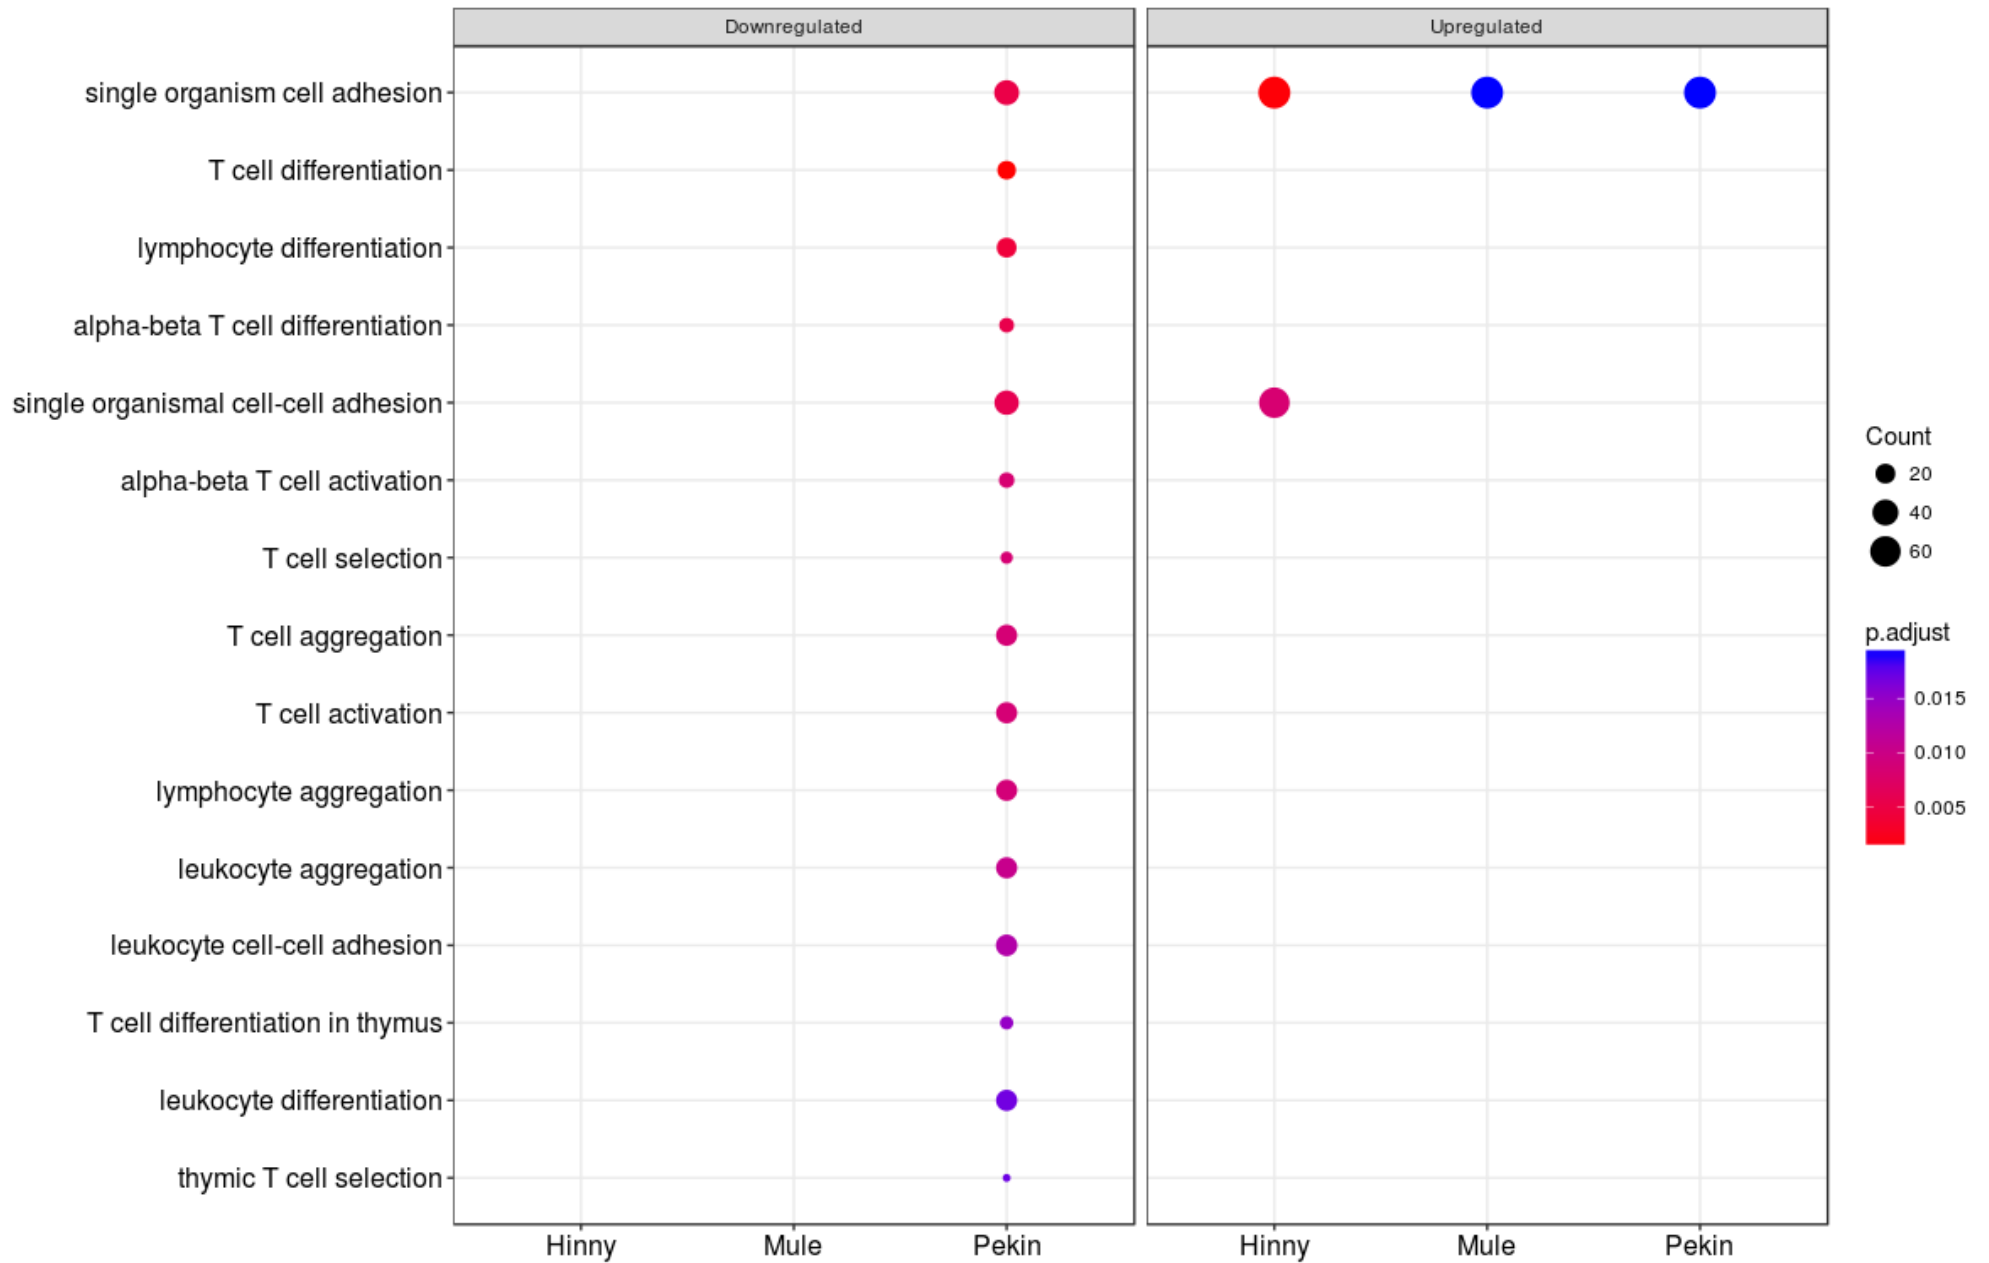

Cluster 3 (83 GO terms), part 2: Anatomical structure development

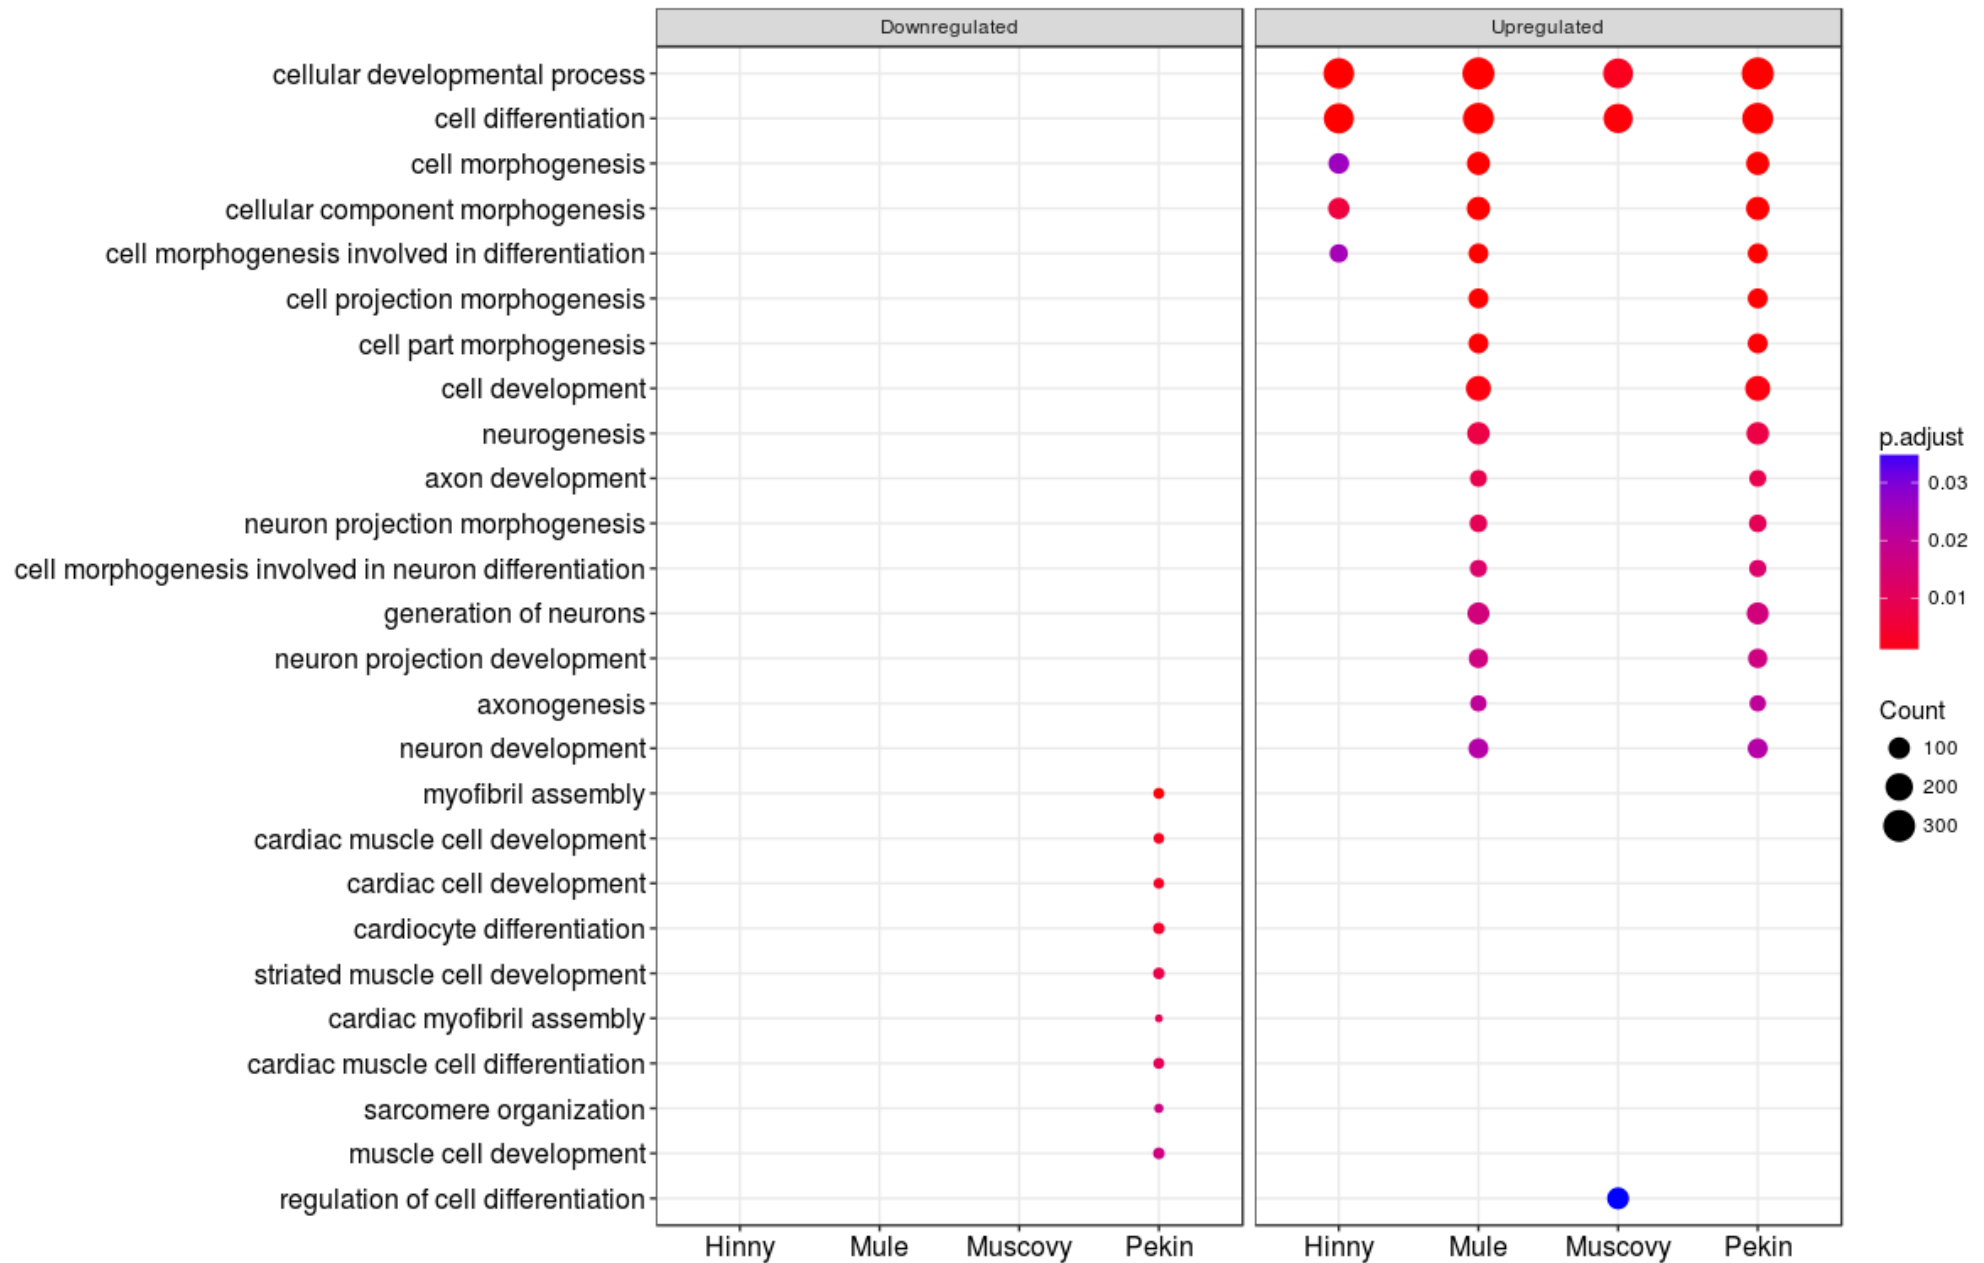

Cluster 3 (83 GO terms), part 3: Anatomical structure development

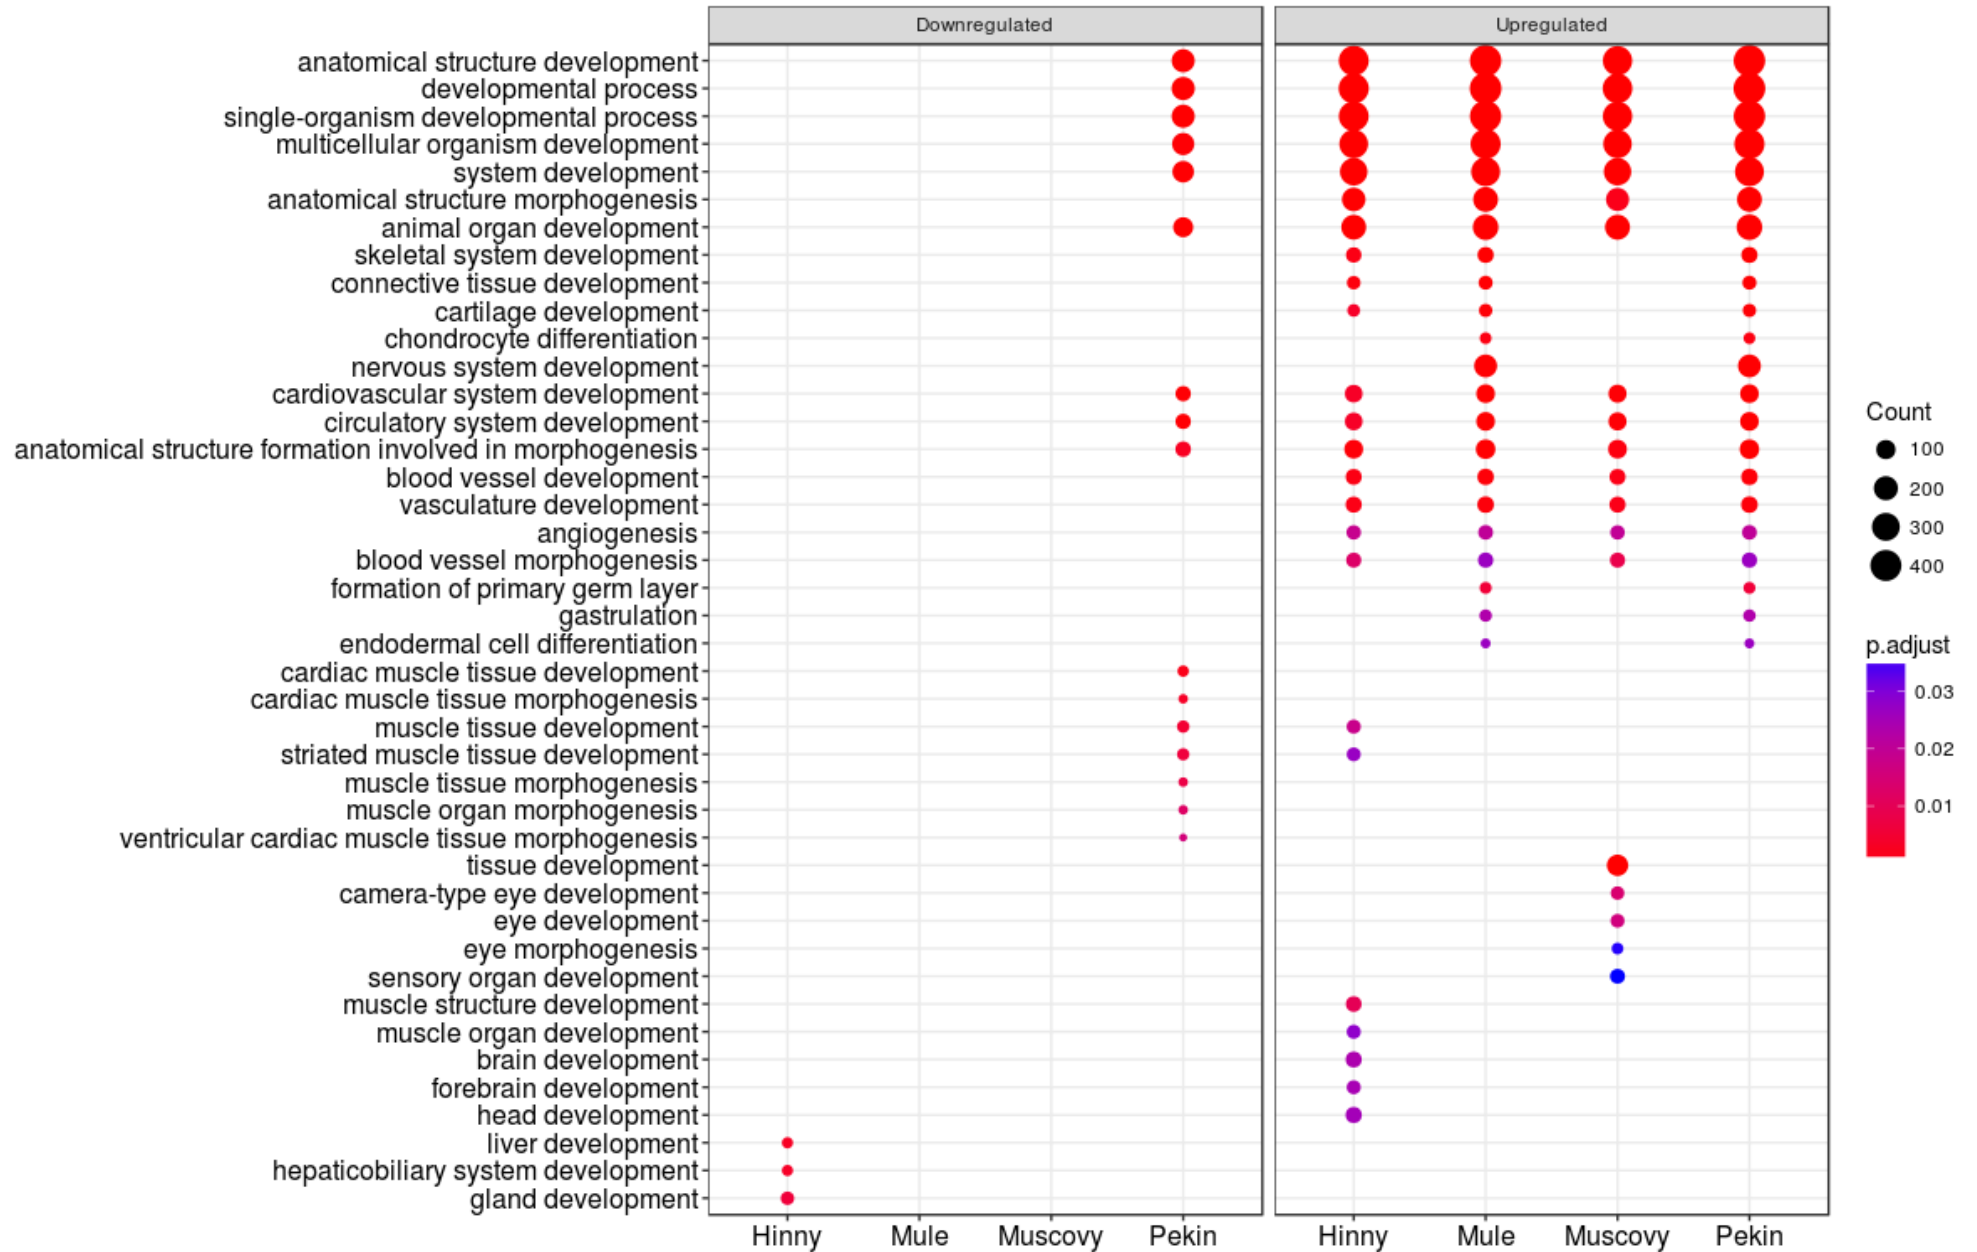

Cluster 4 (42 GO terms): Response to organic substance

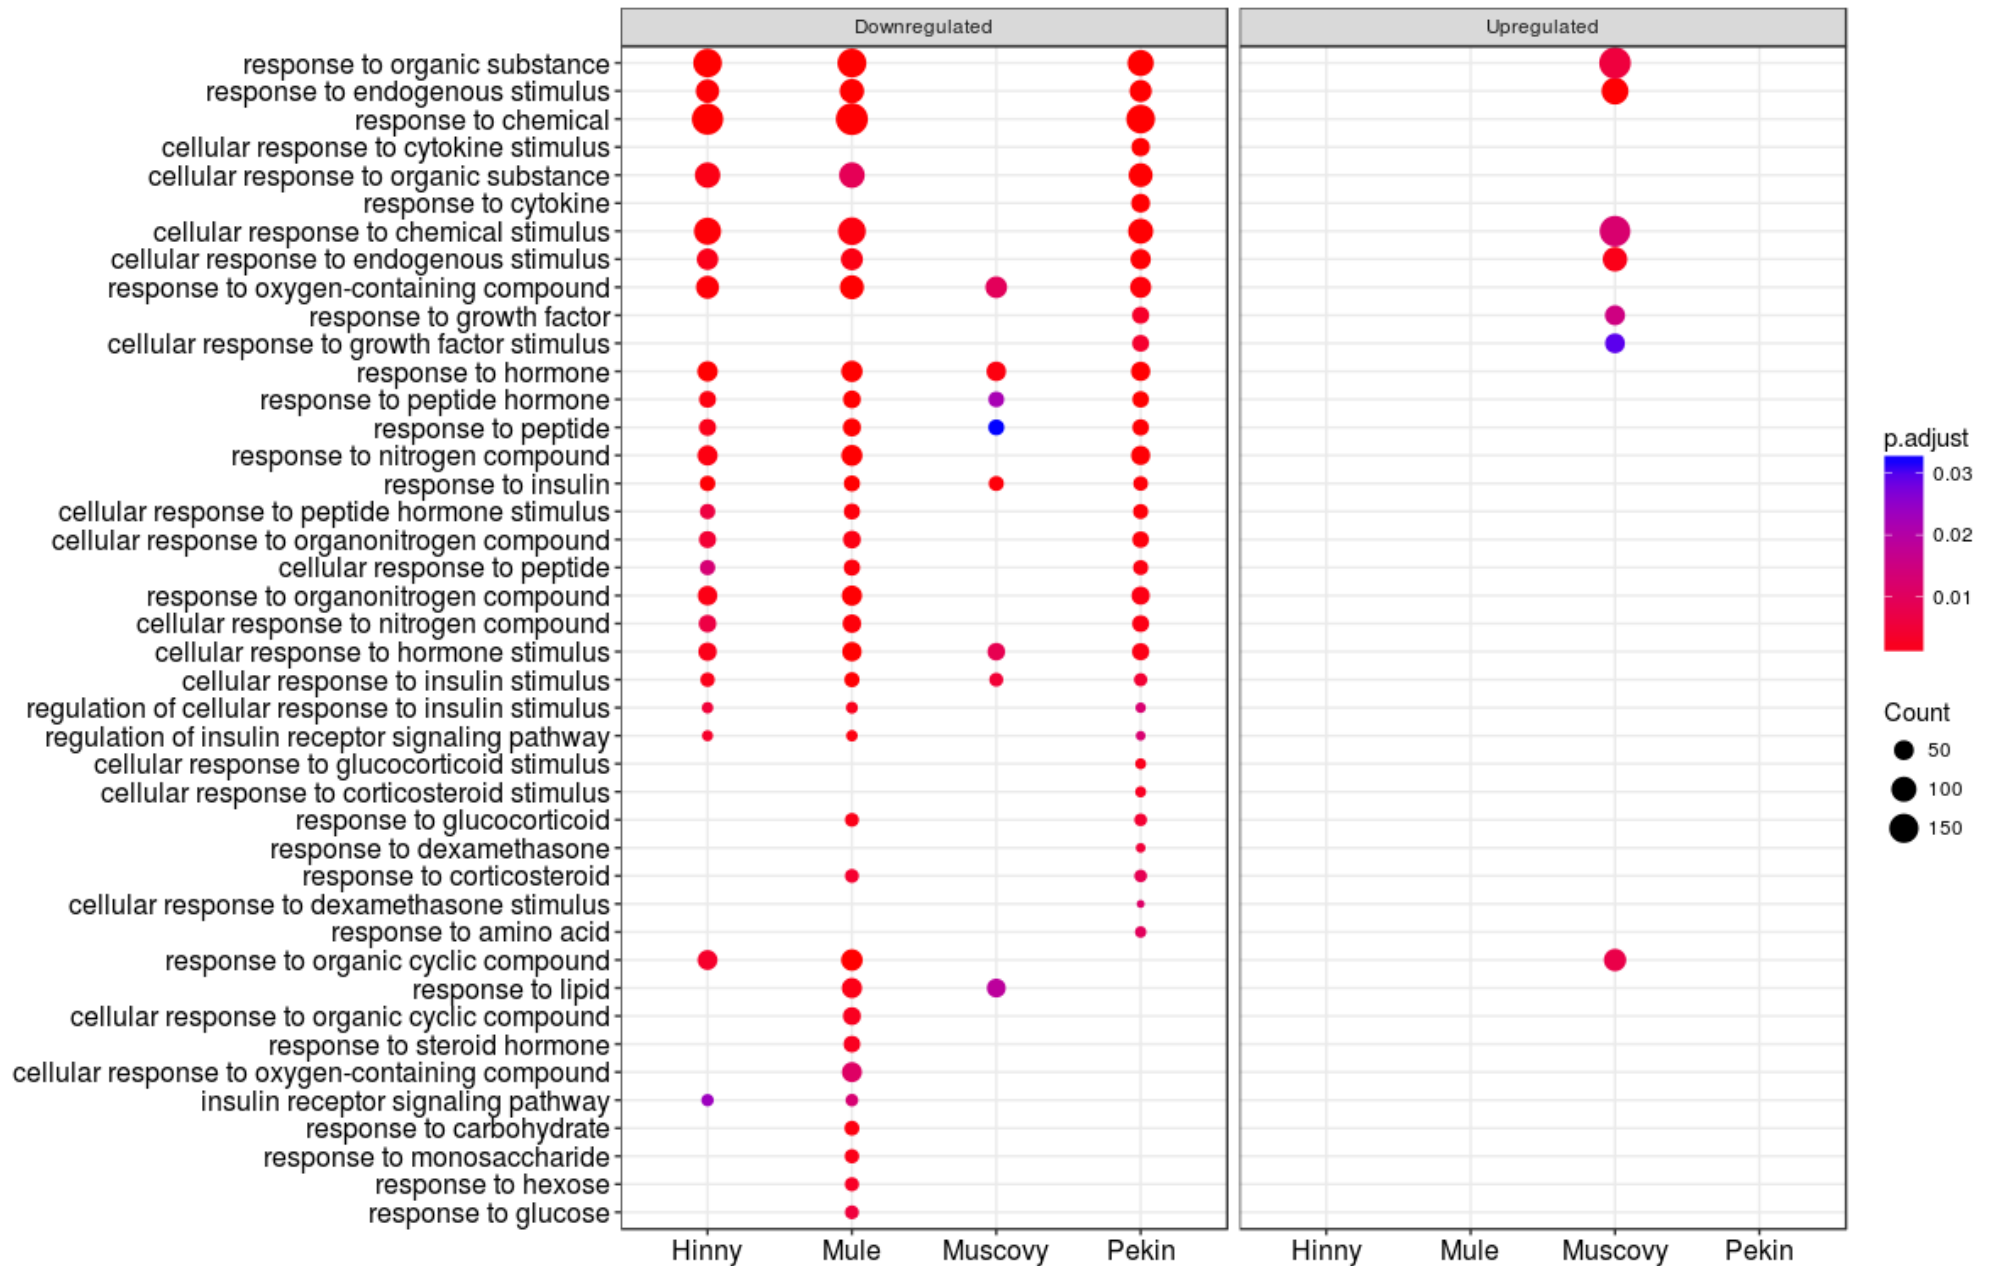

Cluster 5 (40 GO terms): Organic substance metabolic process

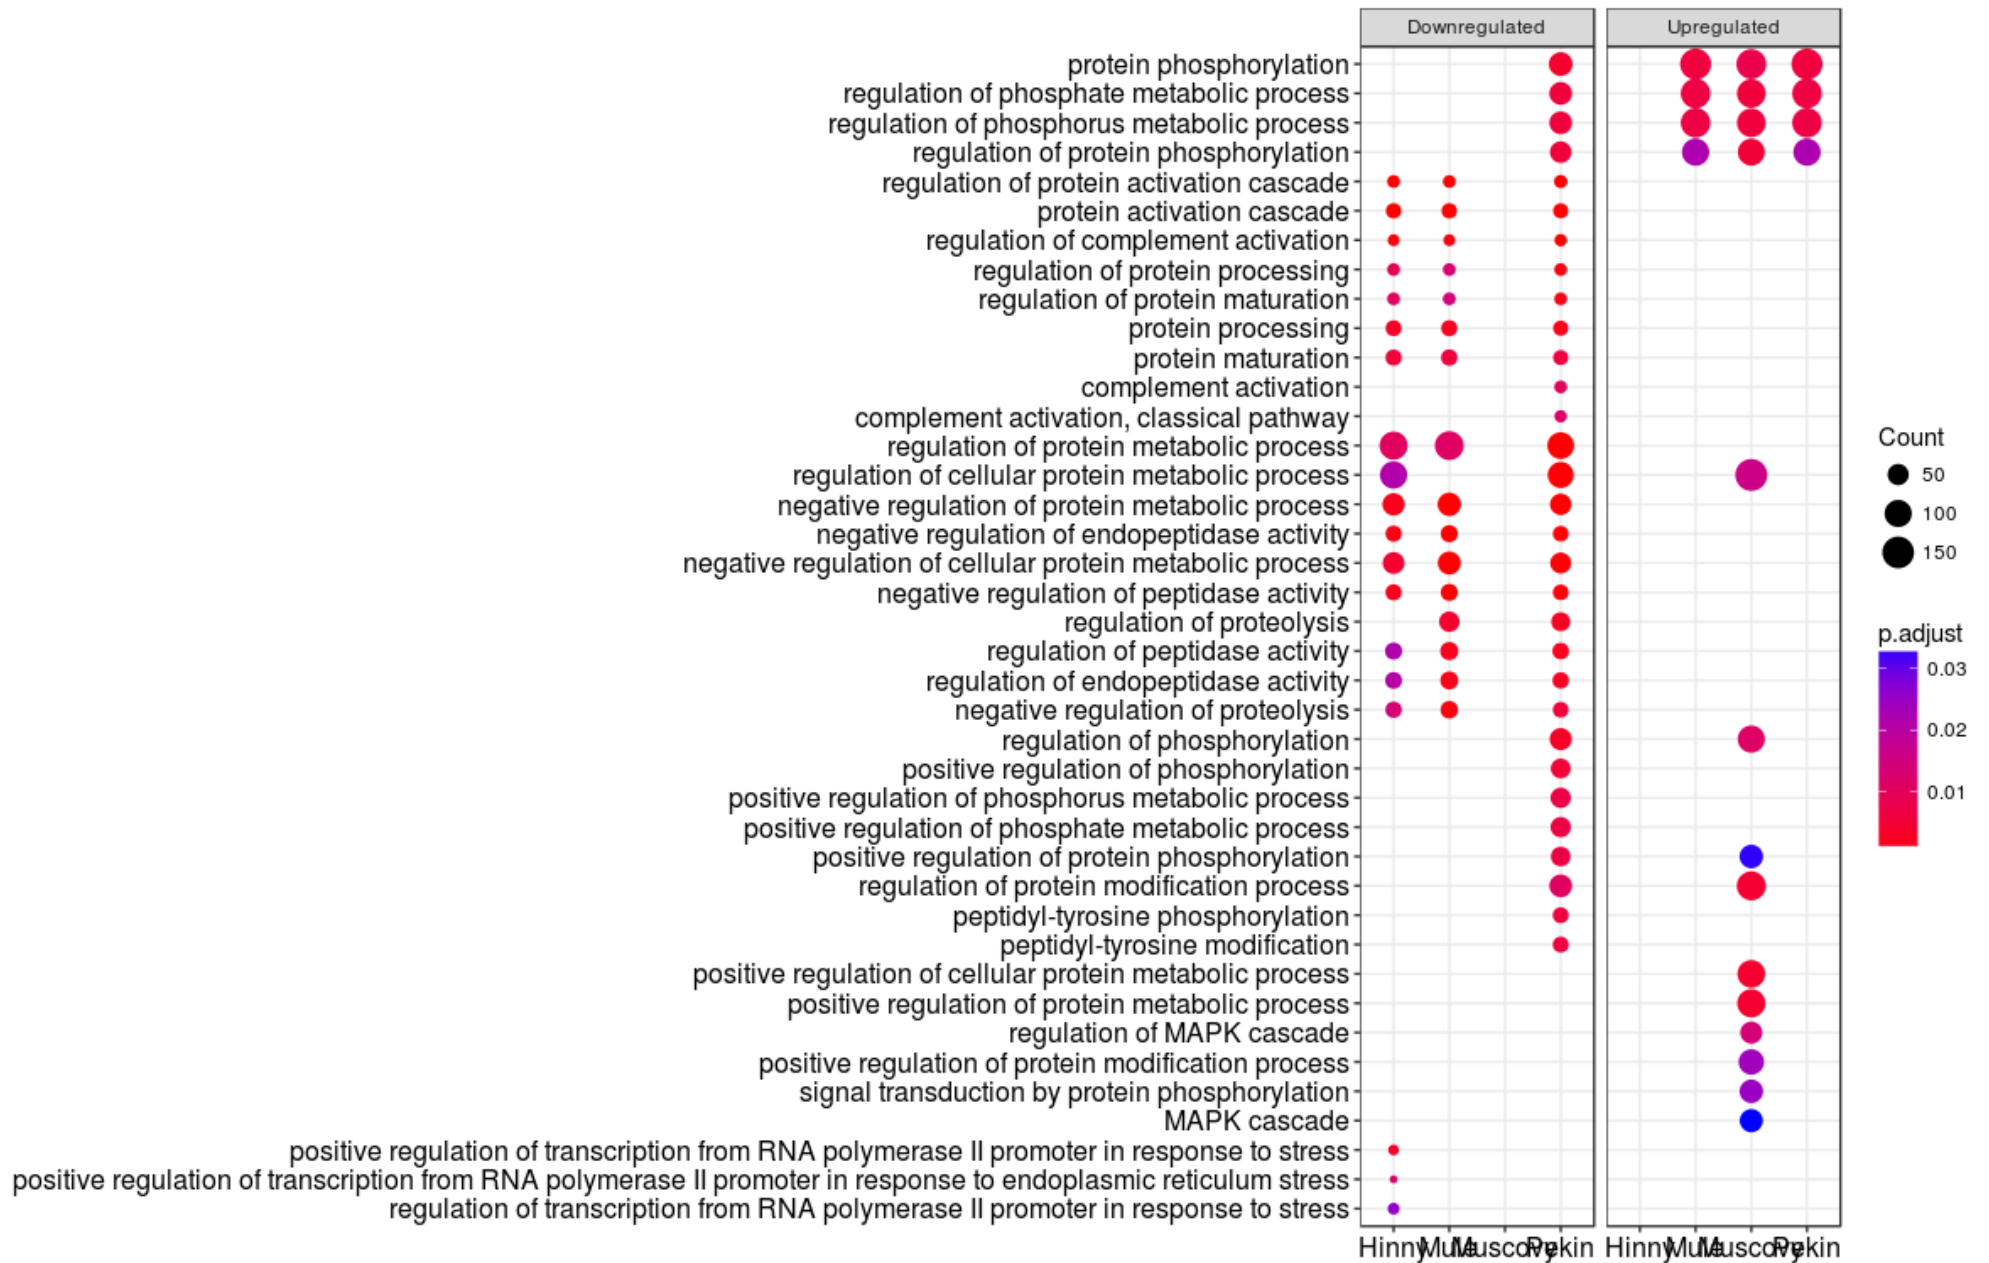

Cluster 6 (99 GO terms), part1: Regulation of biological process

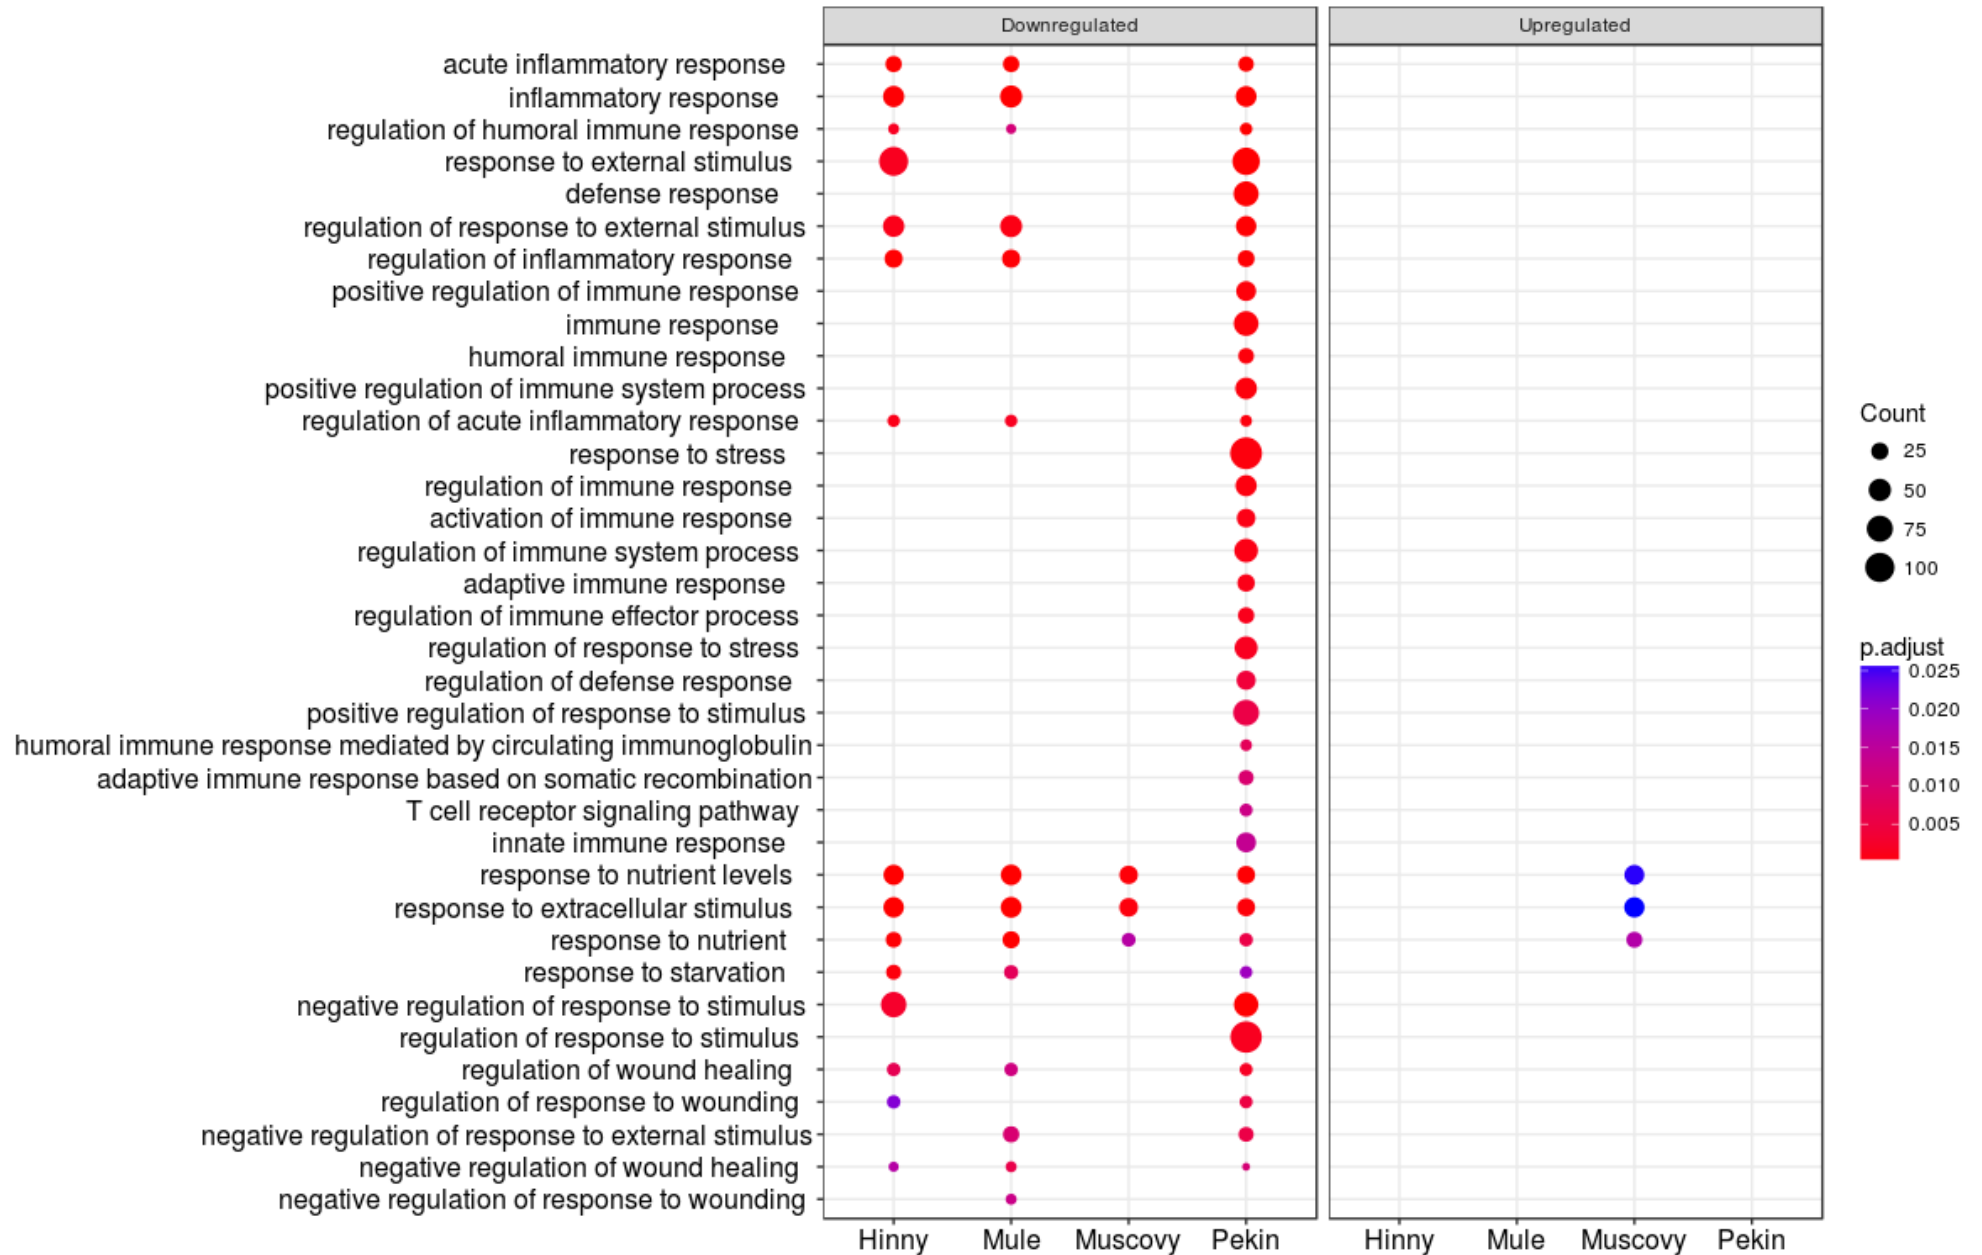



Cluster 6 (99 GO terms), part 2: Regulation of biological process

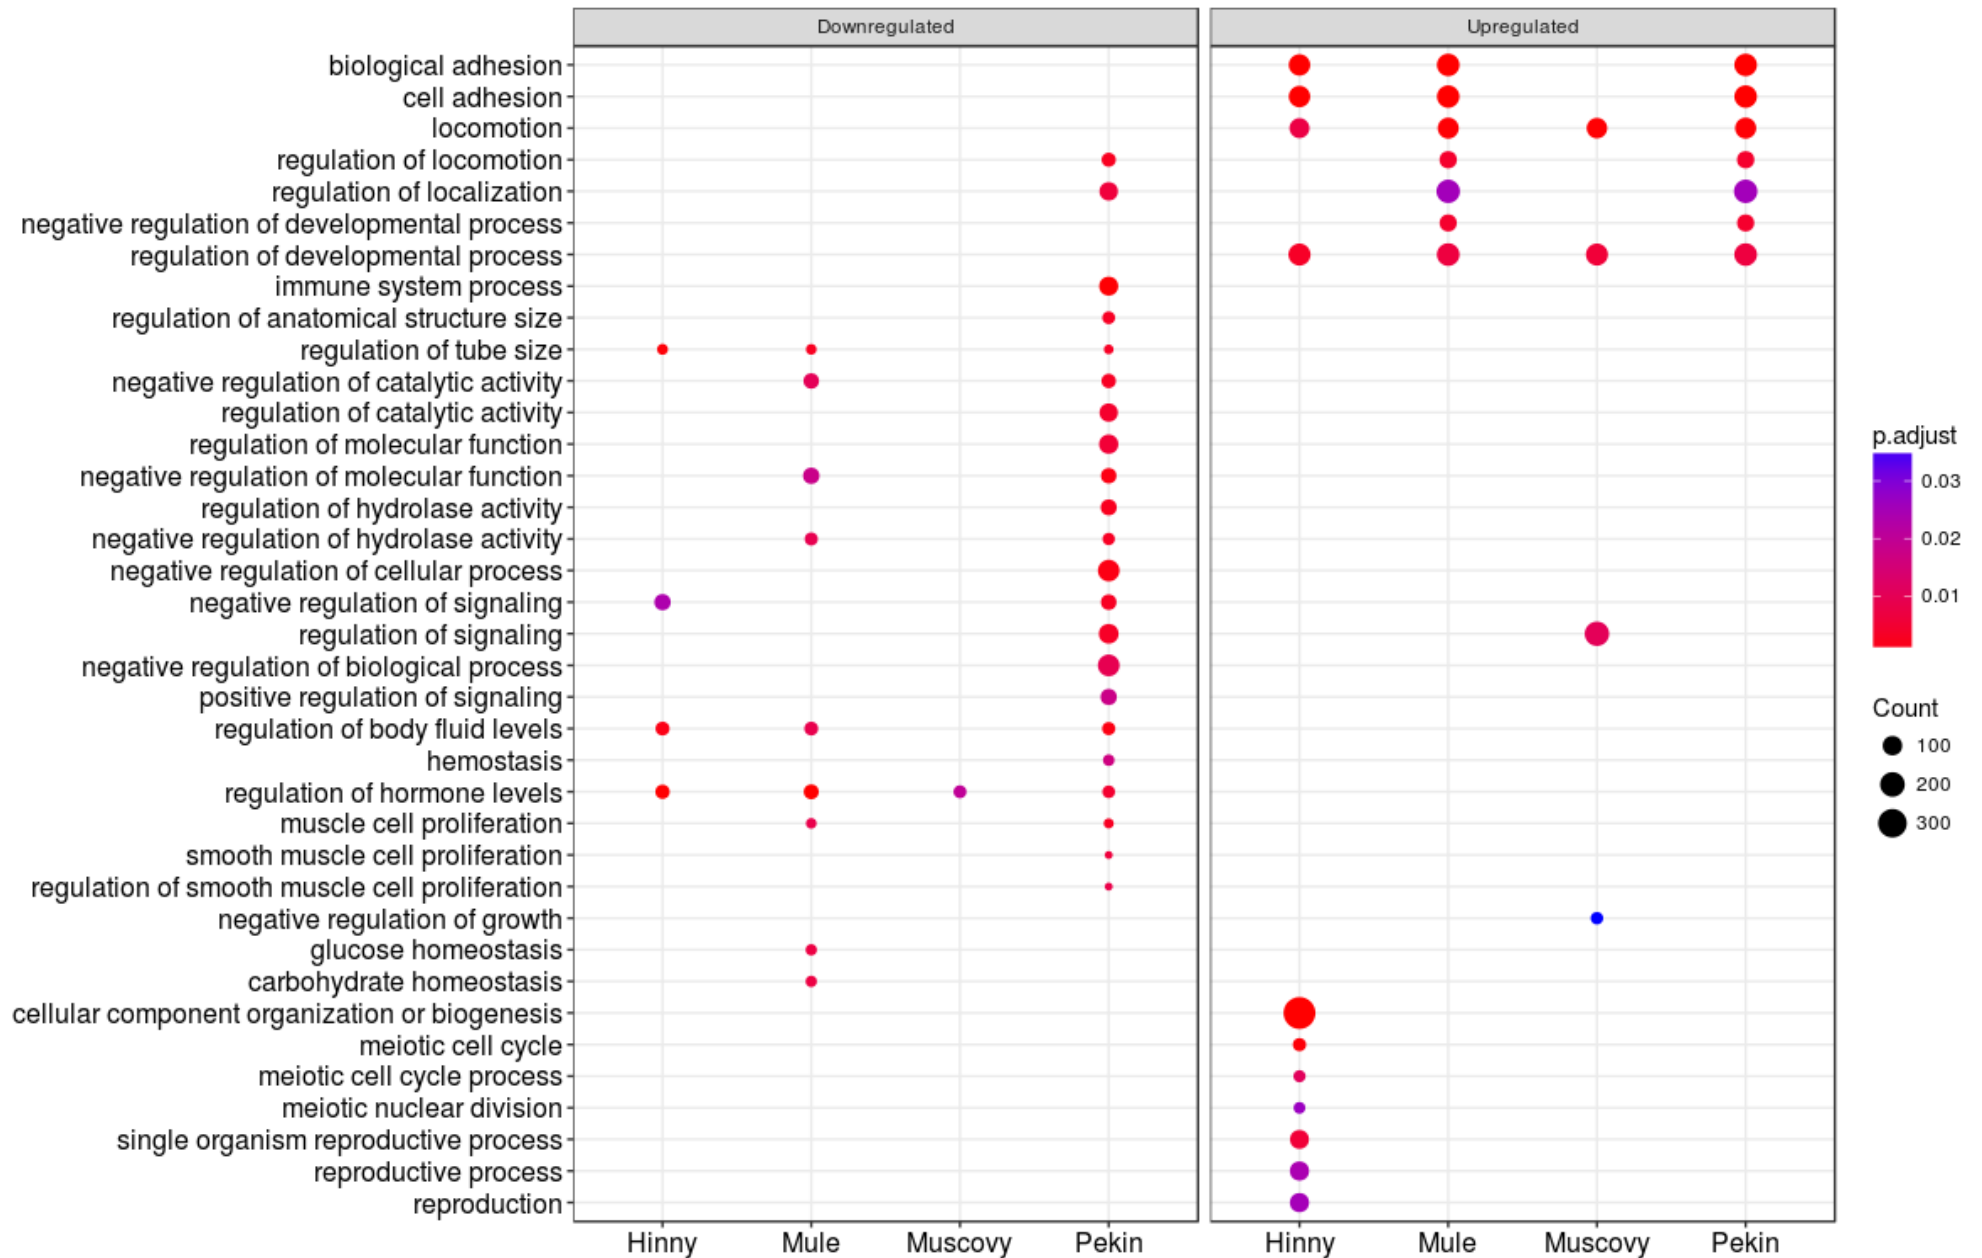

Cluster 6 (99 GO terms), part 3: Regulation of biological process

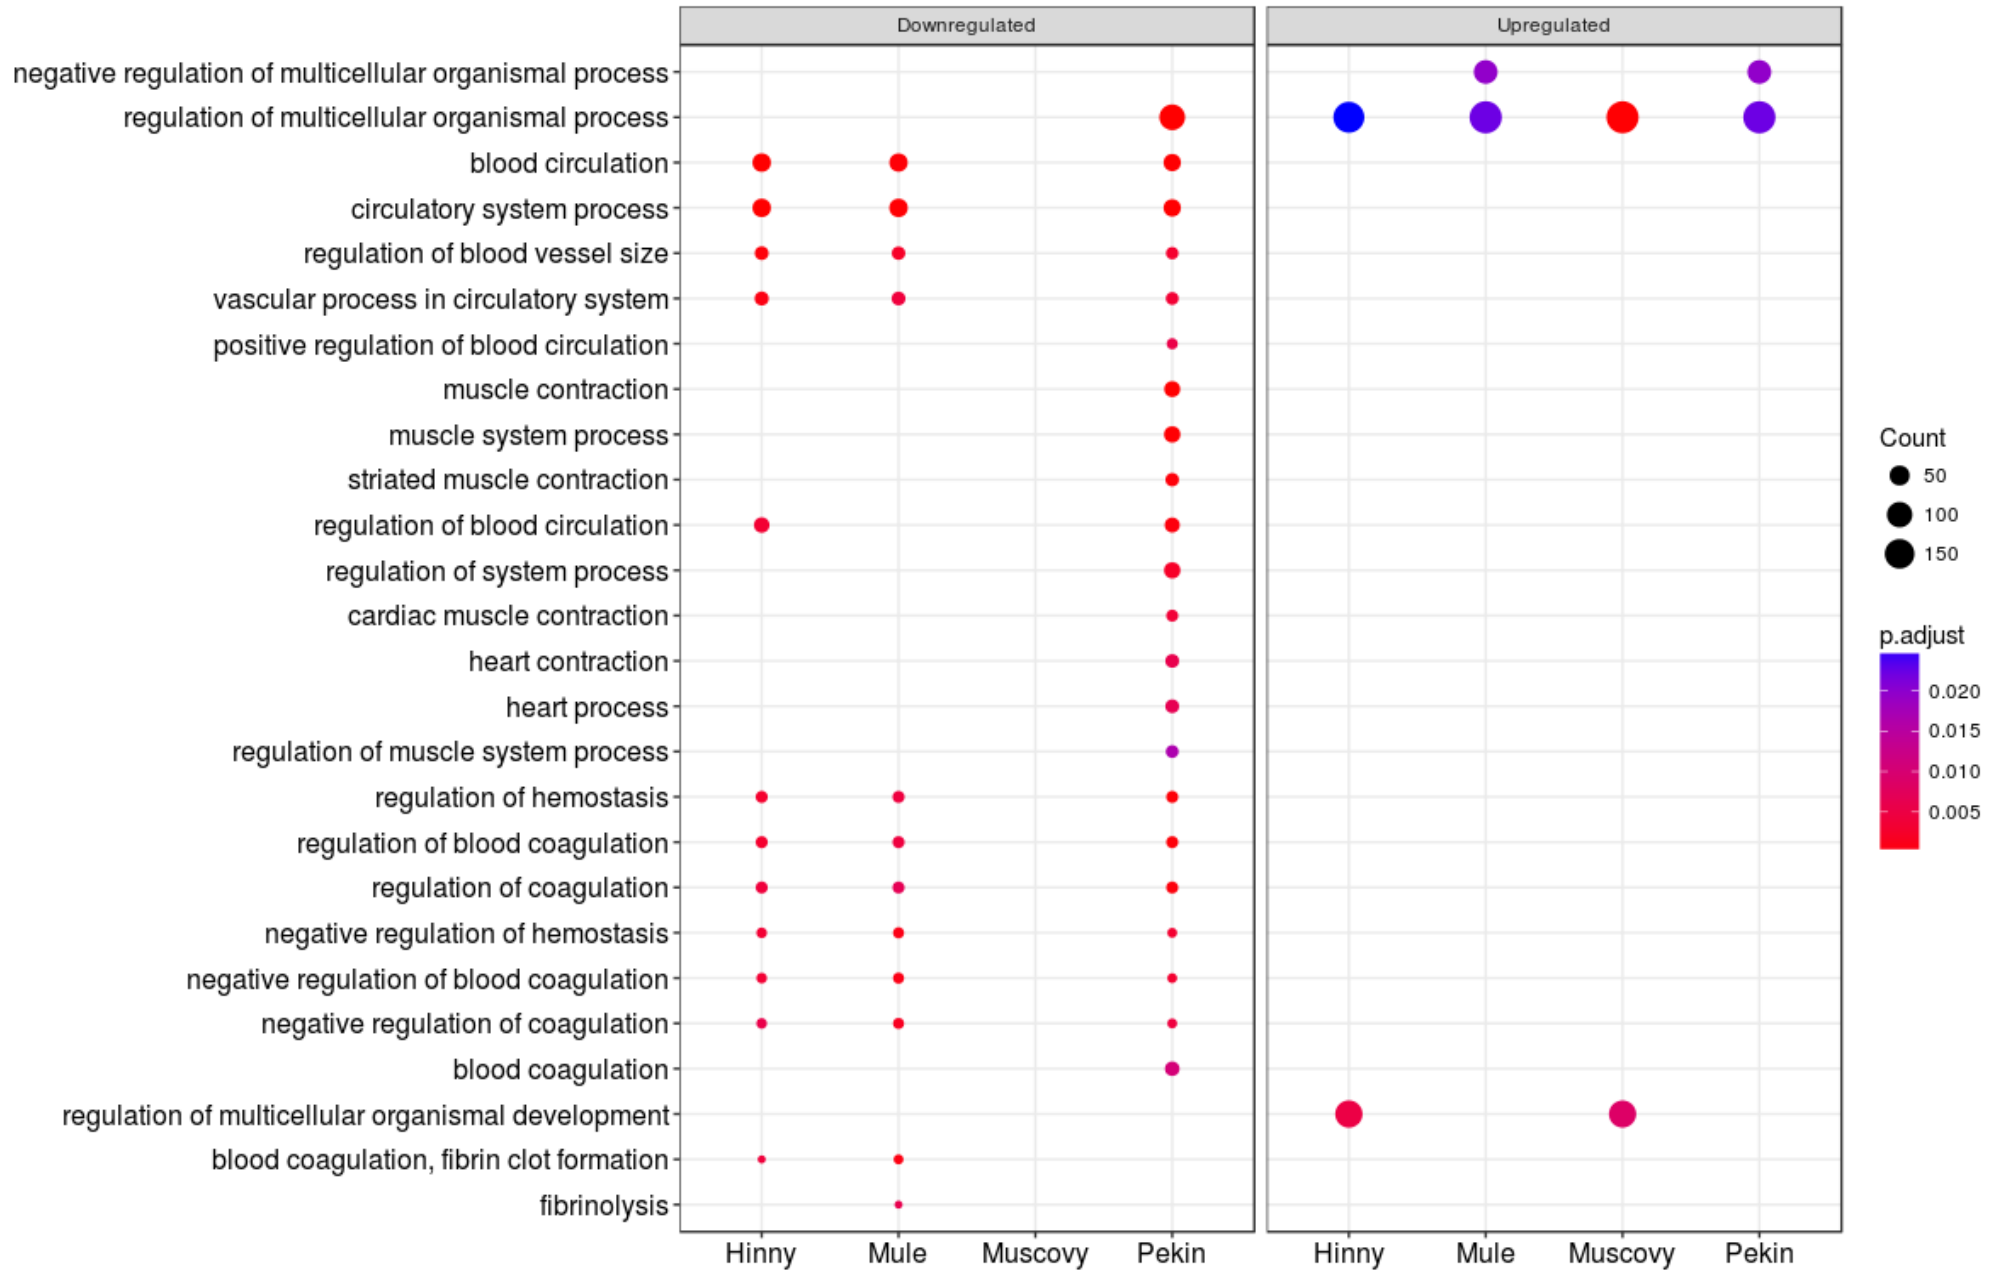

Cluster 7 (41 GO terms): Transport

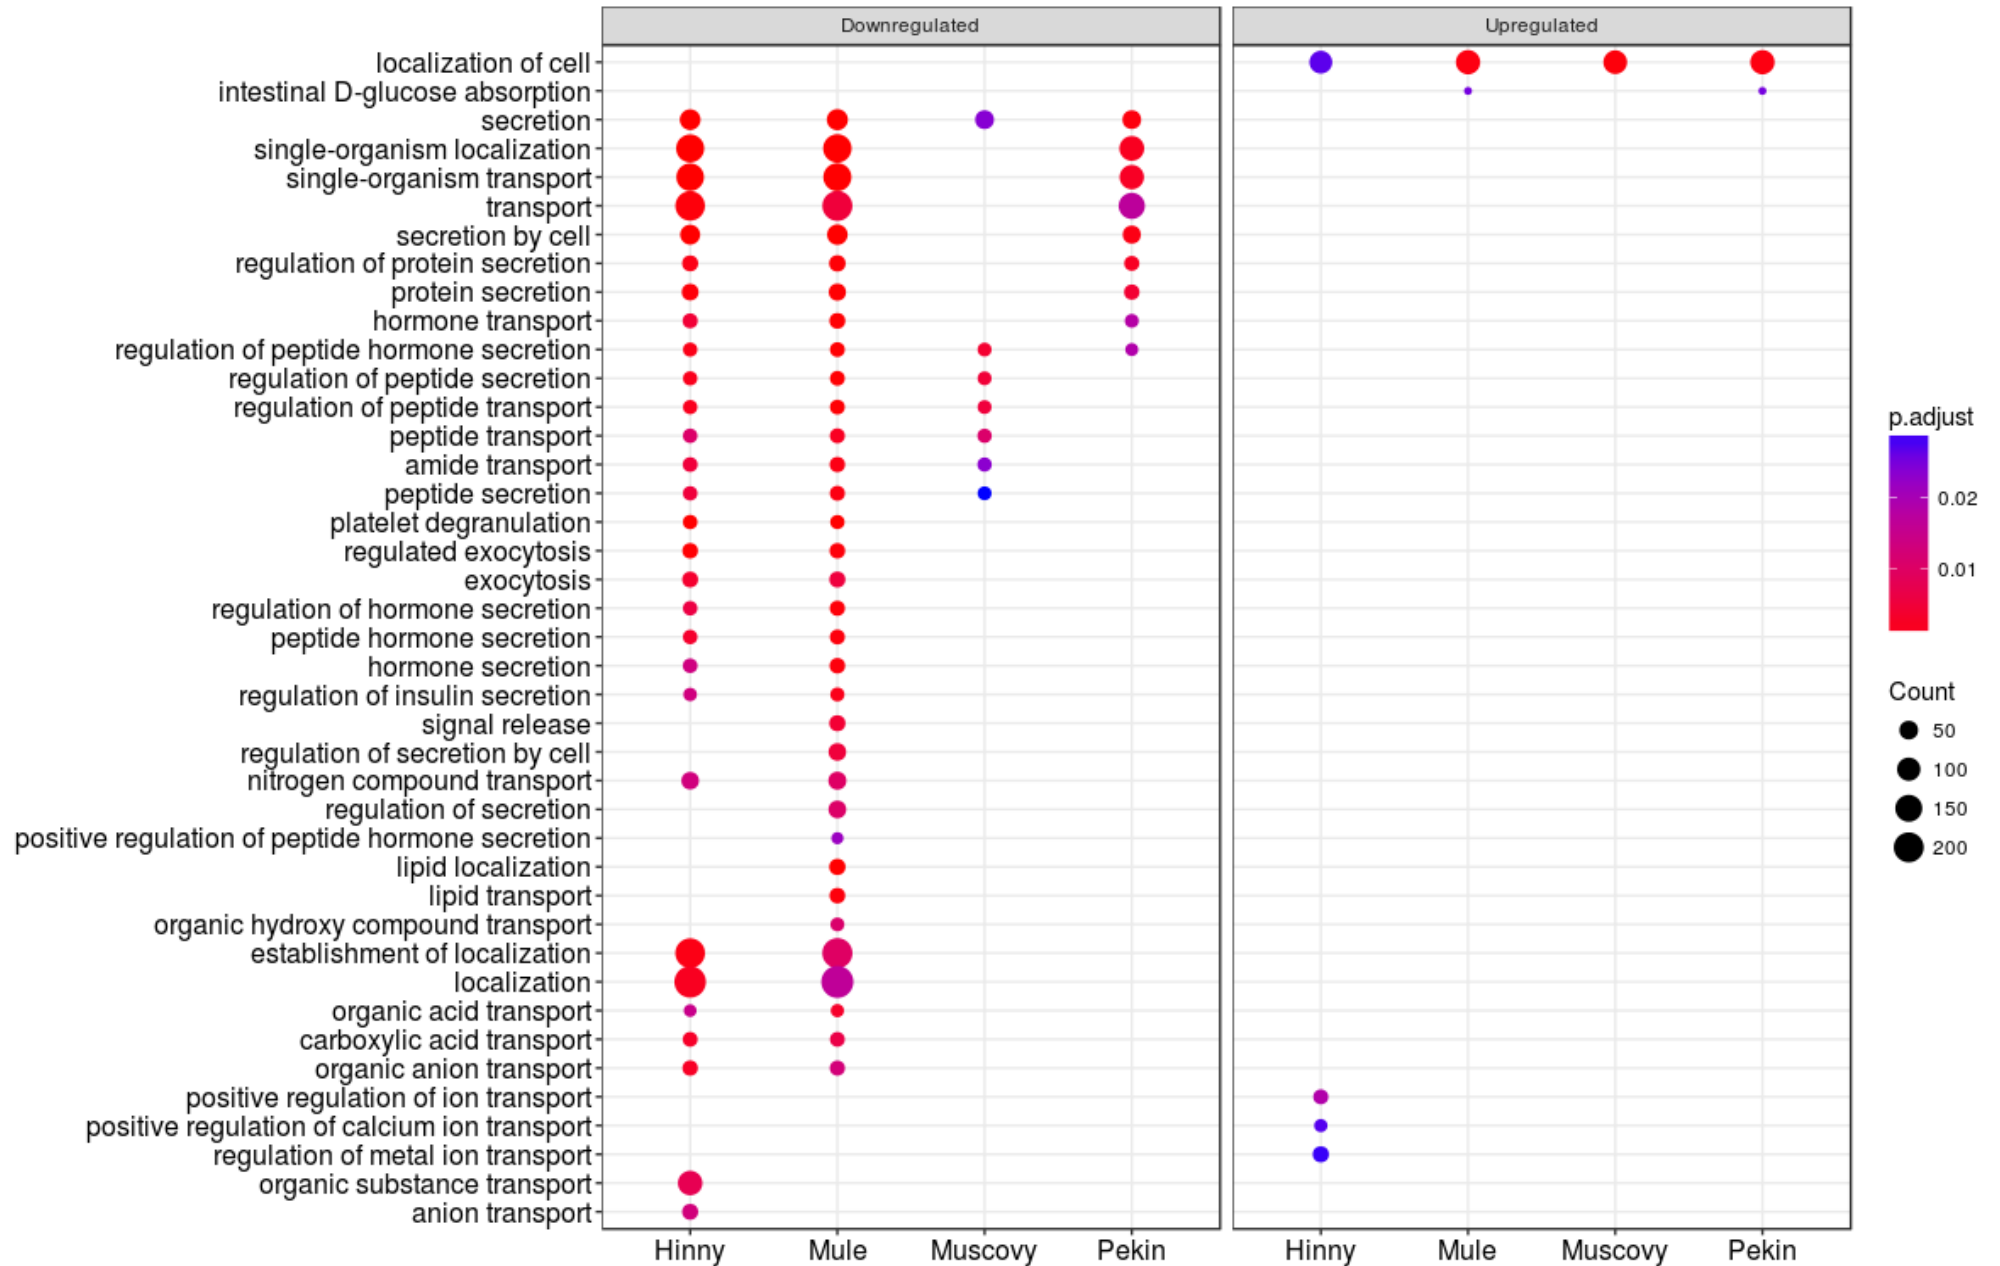

Cluster 8 (36 GO terms): Cellular component organization

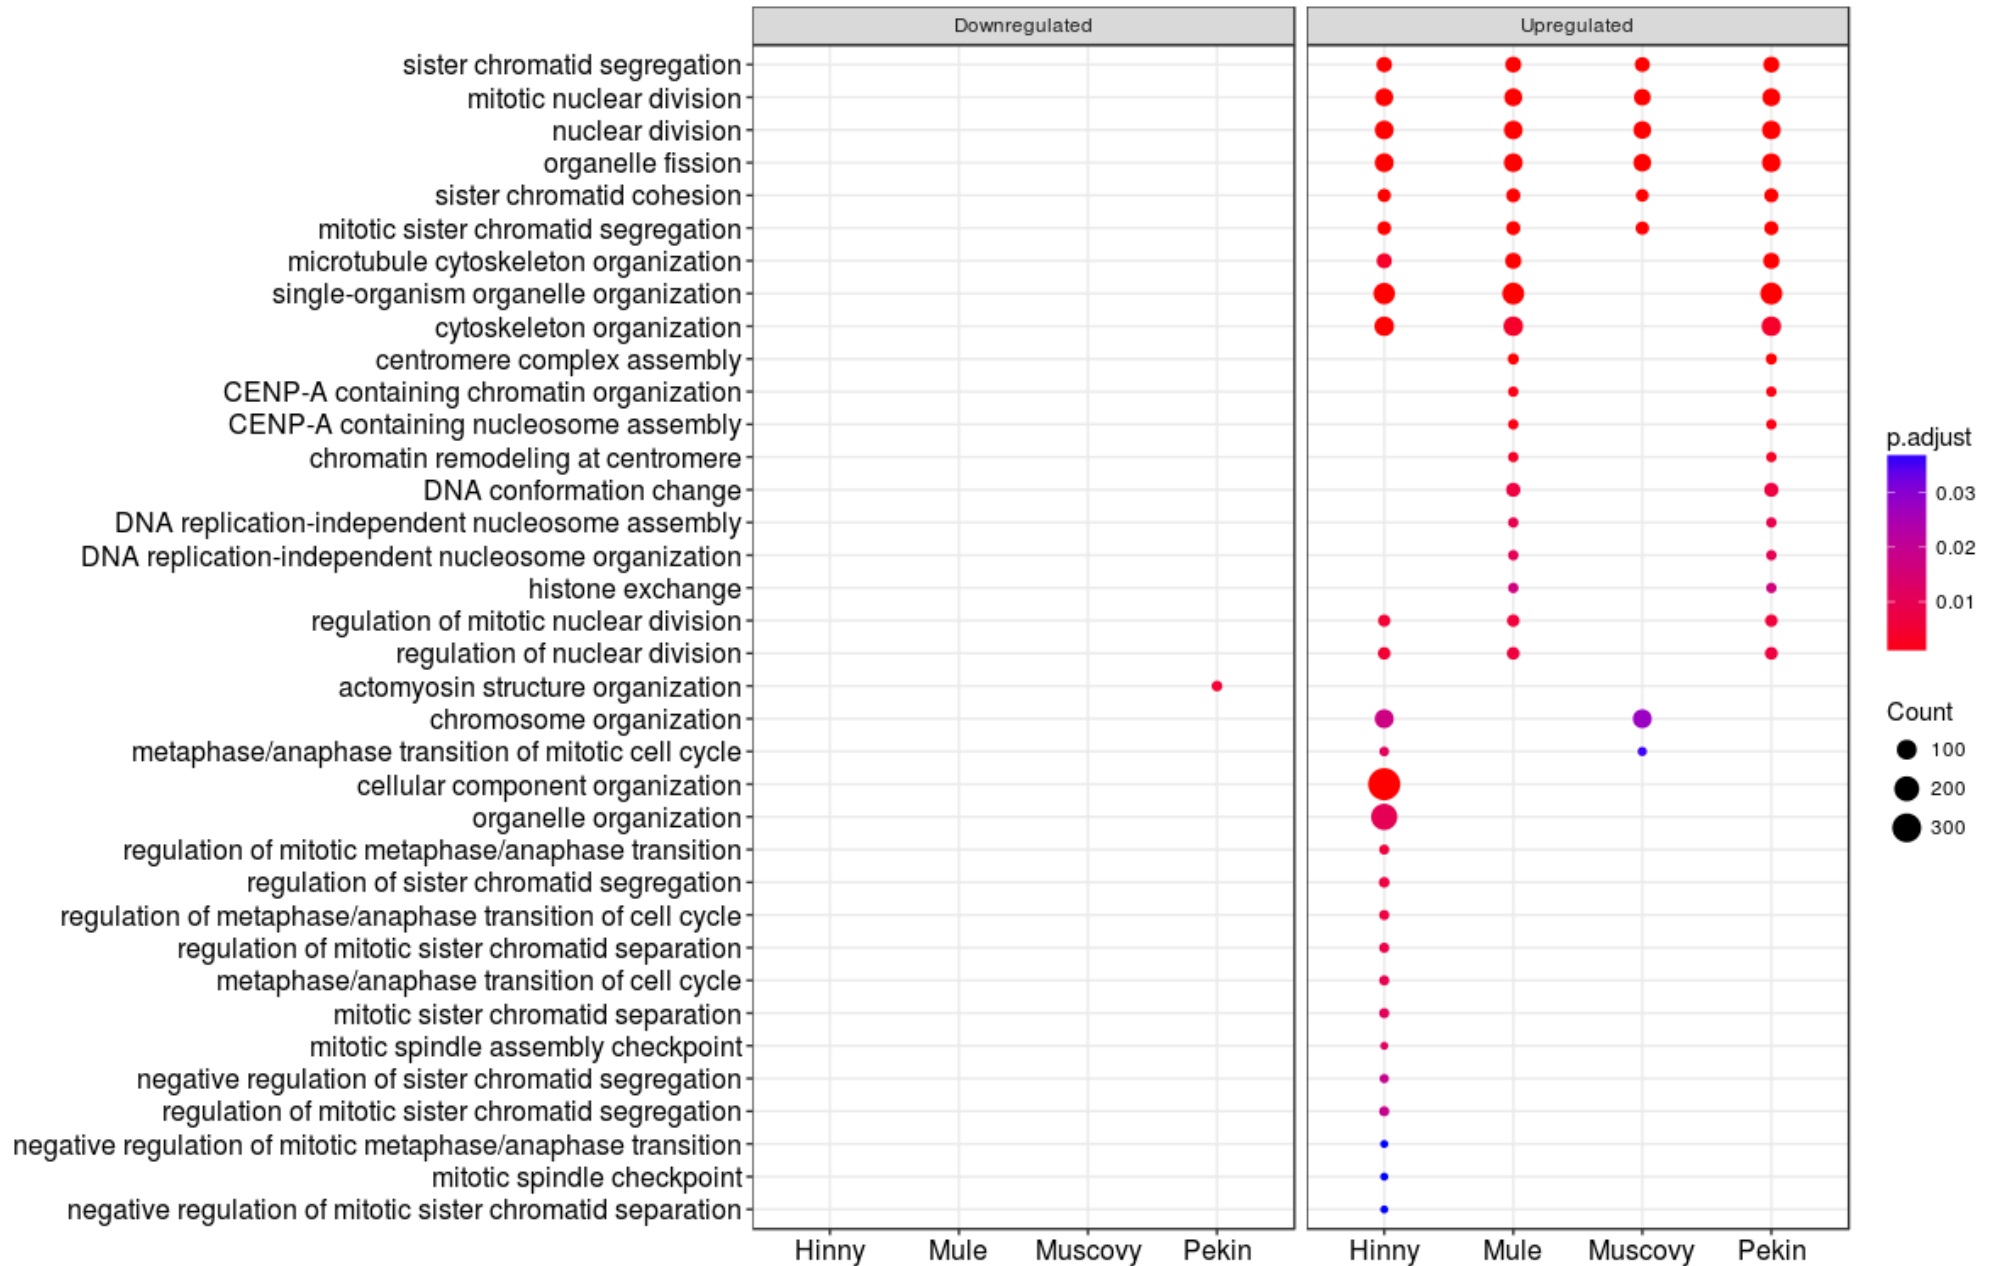

Cluster 9: (87 GO terms) Cell cycle process

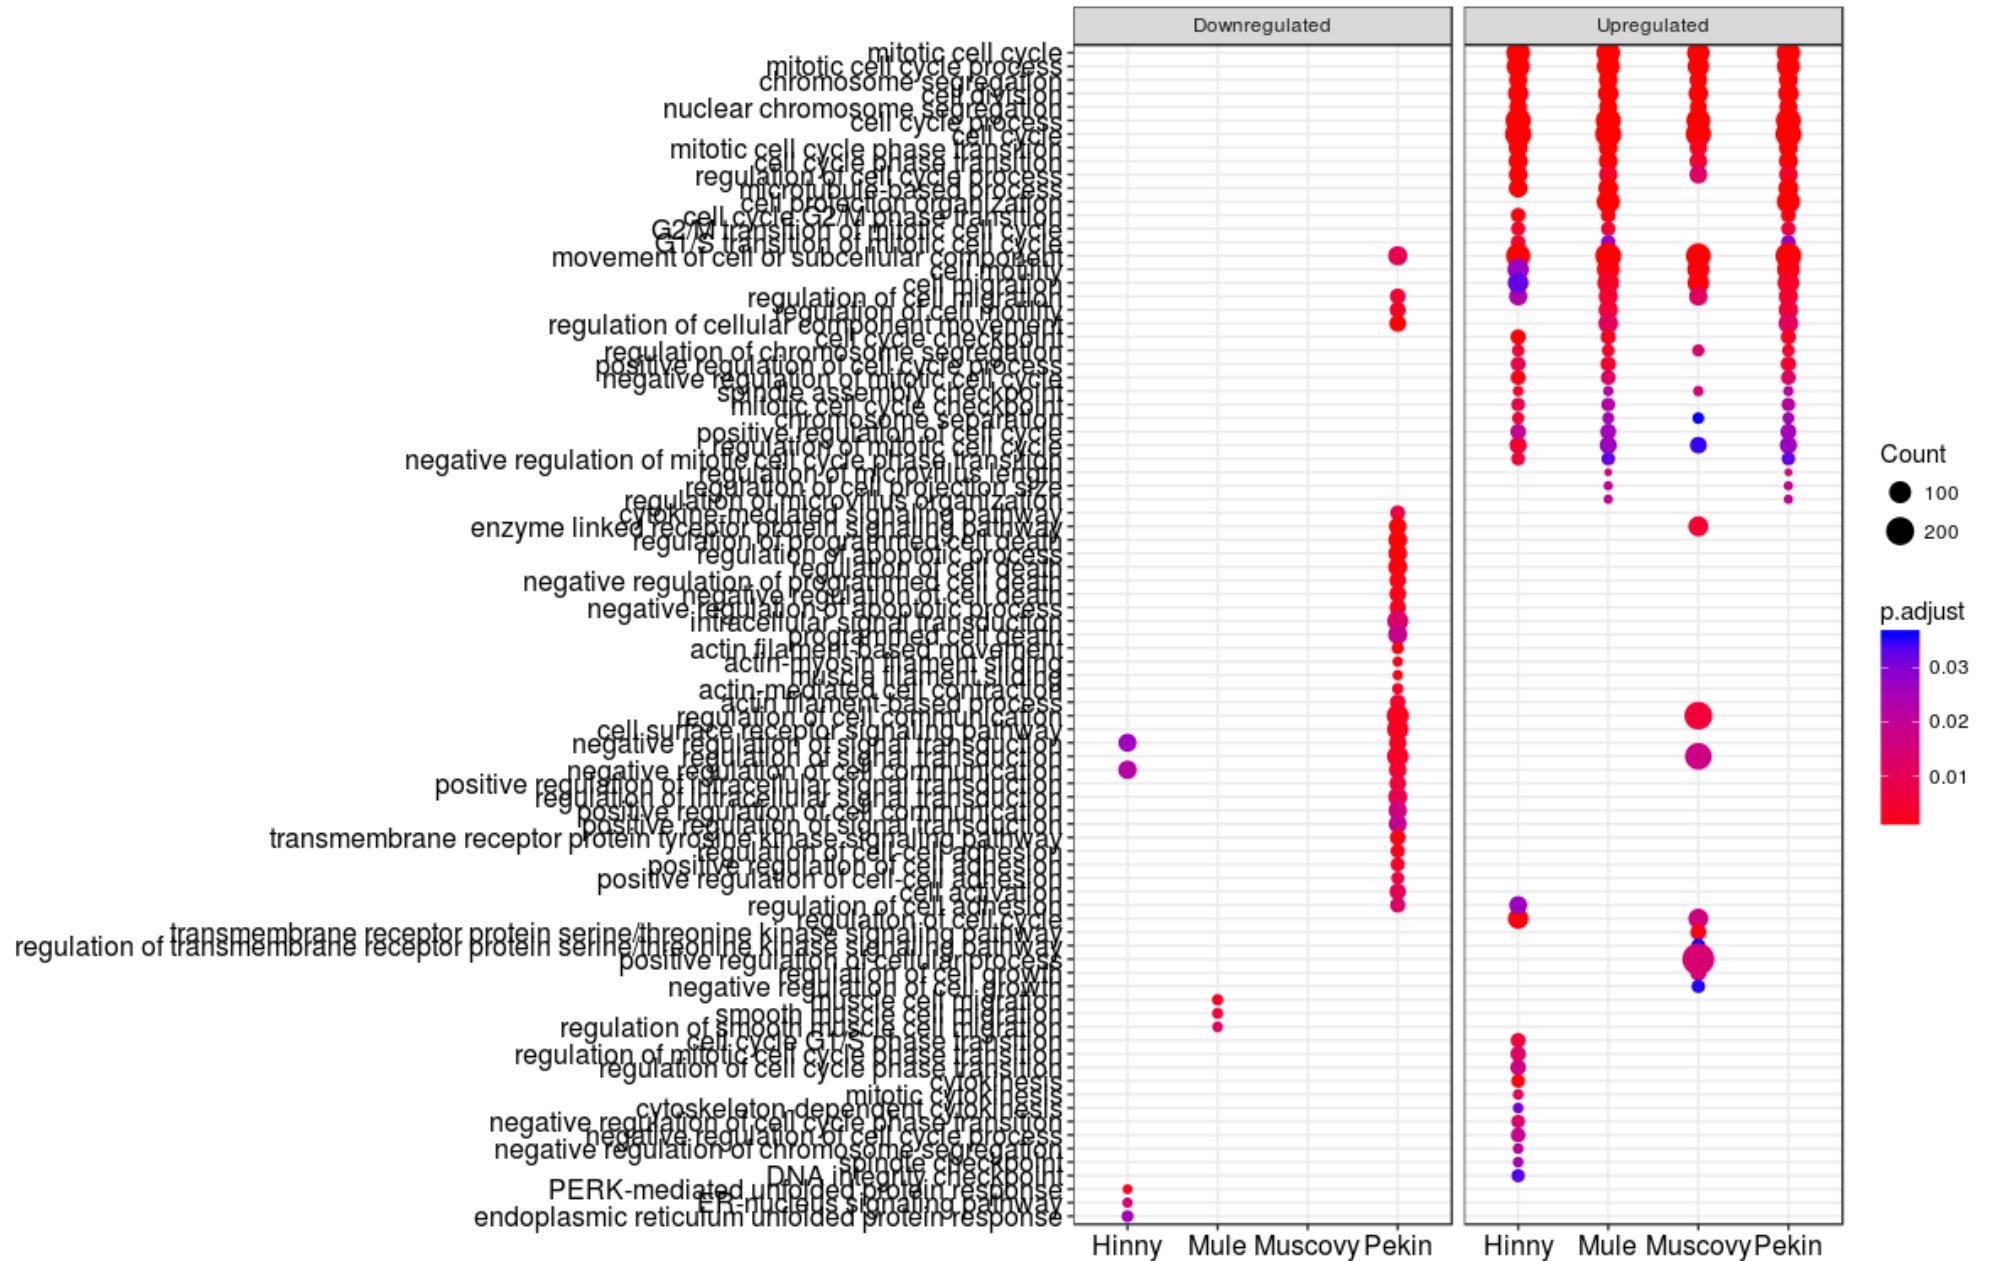

Cluster 9 (87 GO terms), part 1: Cell cycle process

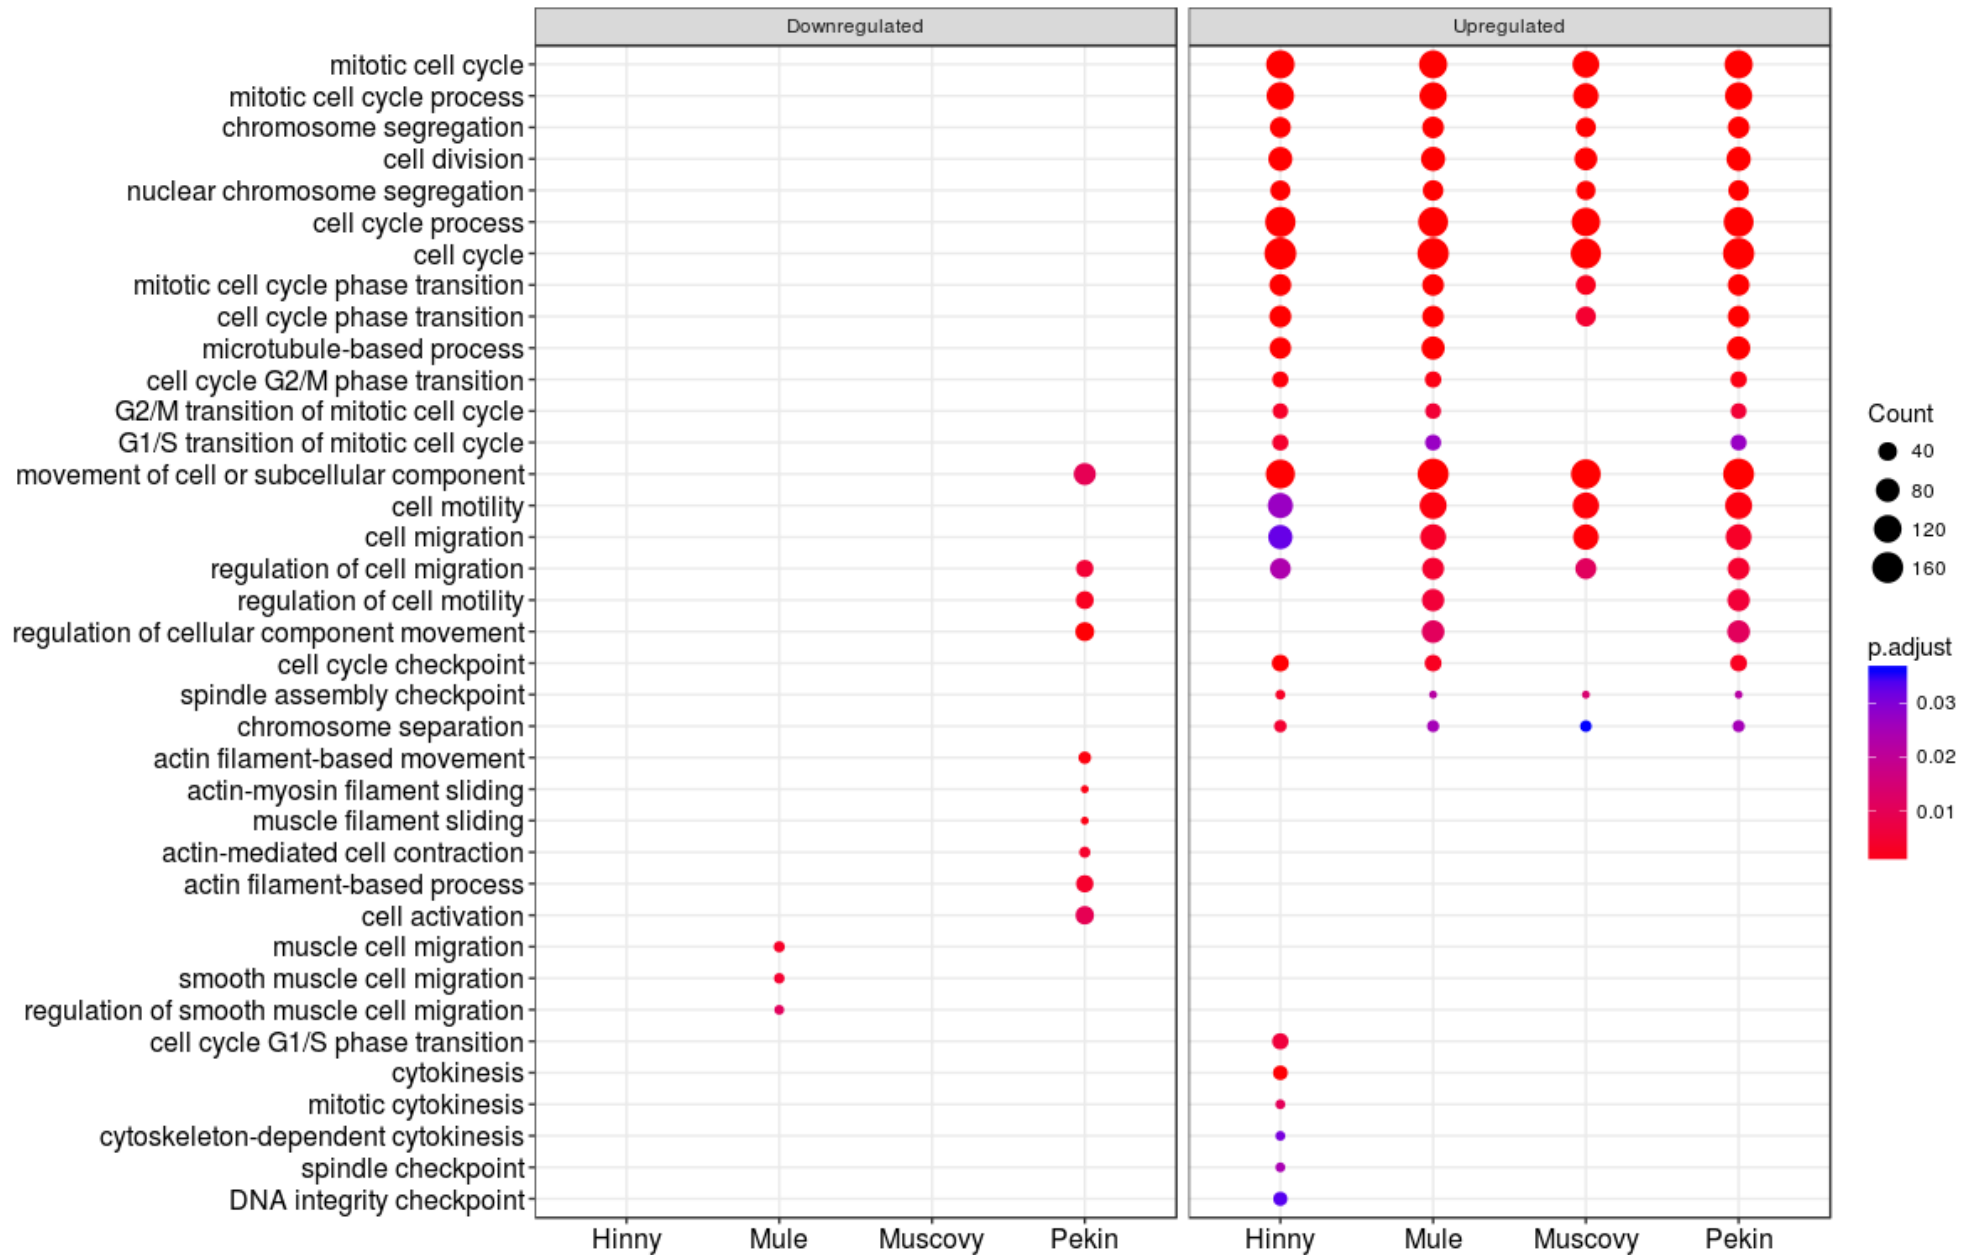

Supplement: 12864_2018_5415_MOESM5_ESM.pdf [file 12864_2018_5415_MOESM5_ESM.pdf]
