# Supplementary material for: RNA-seq analysis of hepatic gene expression of common Pekin, Muscovy, mule and hinny ducks fed ad libitum or overfed
Source: BMC Genomics. 2019 Jan 7;20:13. doi: 10.1186/s12864-018-5415-1 (PMC6323773; doi:10.1186/s12864-018-5415-1)
Supplement: Supplementary file 2 — Gene and transcript annotations. (XLSX 1413 kb) [file 12864_2018_5415_MOESM2_ESM.xlsx]

## Sheet: XLOC AND TCONS
XLOC_000001	TCONS_00000001	ENSAPLG00000016114	TCONS_00000001	ENSAPLT00000016844
XLOC_000001	TCONS_00000002	ENSAPLG00000016114	ENSAPLT00000016844	ENSAPLT00000016844
XLOC_000002	TCONS_00000003	C1orf159	TCONS_00000003	ENSAPLT00000002297
XLOC_000002	TCONS_00000004	C1orf159	ENSAPLT00000002297	ENSAPLT00000002297
XLOC_000003	TCONS_00000005	XLOC_000003	TCONS_00000005
XLOC_000003	TCONS_00000006	XLOC_000003	TCONS_00000006
XLOC_000004	TCONS_00000007	ENSAPLG00000000244	ENSAPLT00000000244	ENSAPLT00000000244
XLOC_000005	TCONS_00000008	ENSAPLG00000000475	ENSAPLT00000000475	ENSAPLT00000000475
XLOC_000006	TCONS_00000009	ENSAPLG00000000093	ENSAPLT00000000093	ENSAPLT00000000093
XLOC_000007	TCONS_00000010	TTLL10	ENSAPLT00000002333	ENSAPLT00000002333
XLOC_000008	TCONS_00000011	ENSAPLG00000002452	TCONS_00000011	ENSAPLT00000002464
XLOC_000008	TCONS_00000012	ENSAPLG00000002452	ENSAPLT00000002464	ENSAPLT00000002464
XLOC_000009	TCONS_00000013	B3GALT6	ENSAPLT00000003102	ENSAPLT00000003102
XLOC_000010	TCONS_00000014	SCNN1D	TCONS_00000014	ENSAPLT00000003531
XLOC_000010	TCONS_00000015	SCNN1D	TCONS_00000015	ENSAPLT00000003531
XLOC_000010	TCONS_00000016	SCNN1D	TCONS_00000016	ENSAPLT00000003531
XLOC_000010	TCONS_00000017	SCNN1D	ENSAPLT00000003531	ENSAPLT00000003531
XLOC_000011	TCONS_00000018	XLOC_000011	TCONS_00000018
XLOC_000012	TCONS_00000019	PUSL1	ENSAPLT00000005110	ENSAPLT00000005110
XLOC_000013	TCONS_00000020	XLOC_000013	TCONS_00000020
XLOC_000013	TCONS_00000021	ENSAPLG00000001589	TCONS_00000021	ENSAPLT00000001581
XLOC_000013	TCONS_00000022	ENSAPLG00000001589	TCONS_00000022	ENSAPLT00000001581
XLOC_000013	TCONS_00000023	ENSAPLG00000001589	ENSAPLT00000001581	ENSAPLT00000001581
XLOC_000014	TCONS_00000024	CPTP	ENSAPLT00000005999	ENSAPLT00000005999
XLOC_000015	TCONS_00000025	TAS1R3	ENSAPLT00000006017	ENSAPLT00000006017
XLOC_000016	TCONS_00000026	TMEM88	ENSAPLT00000007826	ENSAPLT00000007826
XLOC_000017	TCONS_00000027	VWA1	TCONS_00000027	ENSAPLT00000007889
XLOC_000017	TCONS_00000028	VWA1	ENSAPLT00000007889	ENSAPLT00000007889
XLOC_000018	TCONS_00000029	ENSAPLG00000007627	ENSAPLT00000007948	ENSAPLT00000007948
XLOC_000019	TCONS_00000030	XLOC_000019	TCONS_00000030
XLOC_000020	TCONS_00000031	RNF223	ENSAPLT00000001579	ENSAPLT00000001579
XLOC_000021	TCONS_00000032	ENSAPLG00000002321	ENSAPLT00000002327	ENSAPLT00000002327
XLOC_000022	TCONS_00000033	XLOC_000022	TCONS_00000033
XLOC_000023	TCONS_00000034	TNFRSF18	ENSAPLT00000002491	ENSAPLT00000002491
XLOC_000023	TCONS_00000035	TNFRSF18	TCONS_00000035	ENSAPLT00000002491
XLOC_000024	TCONS_00000036	TNFRSF4	ENSAPLT00000002776	ENSAPLT00000002776
XLOC_000024	TCONS_00000037	TNFRSF4	TCONS_00000037	ENSAPLT00000002776
XLOC_000025	TCONS_00000038	SDF4	ENSAPLT00000002868	ENSAPLT00000002868
XLOC_000025	TCONS_00000039	SDF4	TCONS_00000039	ENSAPLT00000002868
XLOC_000026	TCONS_00000041	XLOC_000026	TCONS_00000041
XLOC_000026	TCONS_00000040	XLOC_000026	TCONS_00000040
XLOC_000027	TCONS_00000042	FAM132A	TCONS_00000042	ENSAPLT00000003116
XLOC_000027	TCONS_00000043	FAM132A	ENSAPLT00000003116	ENSAPLT00000003116
XLOC_000027	TCONS_00000045	FAM132A	TCONS_00000045	ENSAPLT00000003116
XLOC_000027	TCONS_00000044	FAM132A	TCONS_00000044	ENSAPLT00000003116
XLOC_000028	TCONS_00000046	UBE2J2	ENSAPLT00000003202	ENSAPLT00000003202
XLOC_000028	TCONS_00000047	UBE2J2	TCONS_00000047	ENSAPLT00000003202
XLOC_000029	TCONS_00000048	XLOC_000029	TCONS_00000048
XLOC_000030	TCONS_00000049	ACAP3	TCONS_00000049	ENSAPLT00000004105
XLOC_000030	TCONS_00000050	ACAP3	TCONS_00000050	ENSAPLT00000004105
XLOC_000030	TCONS_00000051	ACAP3	ENSAPLT00000004105	ENSAPLT00000004105
XLOC_000031	TCONS_00000052	ENSAPLG00000000486	ENSAPLT00000000486	ENSAPLT00000000486
XLOC_000032	TCONS_00000054	CPSF3L	ENSAPLT00000005480	ENSAPLT00000005480
XLOC_000032	TCONS_00000053	CPSF3L	TCONS_00000053	ENSAPLT00000005480
XLOC_000032	TCONS_00000055	CPSF3L	TCONS_00000055	ENSAPLT00000005480
XLOC_000033	TCONS_00000056	DVL1	TCONS_00000056	ENSAPLT00000006513
XLOC_000033	TCONS_00000057	DVL1	TCONS_00000057	ENSAPLT00000006513
XLOC_000033	TCONS_00000058	DVL1	ENSAPLT00000006513	ENSAPLT00000006513
XLOC_000034	TCONS_00000059	XLOC_000034	TCONS_00000059
XLOC_000035	TCONS_00000060	MXRA8	TCONS_00000060	ENSAPLT00000007075
XLOC_000035	TCONS_00000061	MXRA8	ENSAPLT00000007075	ENSAPLT00000007075
XLOC_000036	TCONS_00000062	XLOC_000036	TCONS_00000062
XLOC_000037	TCONS_00000063	XLOC_000037	TCONS_00000063
XLOC_000038	TCONS_00000064	XLOC_000038	TCONS_00000064
XLOC_000039	TCONS_00000065	AURKAIP1	ENSAPLT00000007181	ENSAPLT00000007181
XLOC_000039	TCONS_00000066	AURKAIP1	TCONS_00000066	ENSAPLT00000007181
XLOC_000039	TCONS_00000067	AURKAIP1	TCONS_00000067	ENSAPLT00000007181
XLOC_000040	TCONS_00000068	ENSAPLG00000006980	ENSAPLT00000007242	ENSAPLT00000007242
XLOC_000040	TCONS_00000069	ENSAPLG00000006980	TCONS_00000069	ENSAPLT00000007242
XLOC_000041	TCONS_00000070	CCNL2	ENSAPLT00000007461	ENSAPLT00000007461
XLOC_000041	TCONS_00000072	CCNL2	TCONS_00000072	ENSAPLT00000007461
XLOC_000041	TCONS_00000071	CCNL2	TCONS_00000071	ENSAPLT00000007461
XLOC_000041	TCONS_00000073	MRPL20	ENSAPLT00000007783	ENSAPLT00000007783
XLOC_000042	TCONS_00000074	TMEM240	ENSAPLT00000008667	ENSAPLT00000008667
XLOC_000042	TCONS_00000075	TMEM240	TCONS_00000075	ENSAPLT00000008667
XLOC_000043	TCONS_00000076	SSU72	ENSAPLT00000008704	ENSAPLT00000008704
XLOC_000043	TCONS_00000077	SSU72	TCONS_00000077	ENSAPLT00000008704
XLOC_000044	TCONS_00000078	ENSAPLG00000008453	TCONS_00000078	ENSAPLT00000008788
XLOC_000044	TCONS_00000079	ENSAPLG00000008453	ENSAPLT00000008788	ENSAPLT00000008788
XLOC_000044	TCONS_00000080	ENSAPLG00000008498	ENSAPLT00000008829	ENSAPLT00000008829
XLOC_000045	TCONS_00000081	METTL11B	ENSAPLT00000002524	ENSAPLT00000002524
XLOC_000045	TCONS_00000082	METTL11B	TCONS_00000082	ENSAPLT00000002524
XLOC_000046	TCONS_00000085	GORAB	ENSAPLT00000002533	ENSAPLT00000002533
XLOC_000046	TCONS_00000084	GORAB	TCONS_00000084	ENSAPLT00000002533
XLOC_000046	TCONS_00000083	GORAB	TCONS_00000083	ENSAPLT00000002533
XLOC_000047	TCONS_00000086	PRRX1	ENSAPLT00000002554	ENSAPLT00000002554
XLOC_000048	TCONS_00000087	ENSAPLG00000002757	TCONS_00000087	ENSAPLT00000002820
XLOC_000048	TCONS_00000088	ENSAPLG00000002757	ENSAPLT00000002820	ENSAPLT00000002820
XLOC_000049	TCONS_00000089	FMO4	TCONS_00000089	ENSAPLT00000003616
XLOC_000049	TCONS_00000090	FMO4	ENSAPLT00000003616	ENSAPLT00000003616
XLOC_000050	TCONS_00000091	PRRC2C	TCONS_00000091	ENSAPLT00000003853
XLOC_000050	TCONS_00000092	PRRC2C	TCONS_00000092	ENSAPLT00000003853
XLOC_000050	TCONS_00000093	PRRC2C	ENSAPLT00000003853	ENSAPLT00000003853
XLOC_000050	TCONS_00000095	VAMP4	ENSAPLT00000004310	ENSAPLT00000004310
XLOC_000051	TCONS_00000094	ENSAPLG00000001592	ENSAPLT00000001585	ENSAPLT00000001585
XLOC_000052	TCONS_00000096	METTL13	ENSAPLT00000004572	ENSAPLT00000004572
XLOC_000053	TCONS_00000097	ENSAPLG00000004816	TCONS_00000097	ENSAPLT00000004961
XLOC_000053	TCONS_00000098	ENSAPLG00000004798	ENSAPLT00000004936	ENSAPLT00000004936
XLOC_000053	TCONS_00000099	ENSAPLG00000004816	TCONS_00000099	ENSAPLT00000004961
XLOC_000053	TCONS_00000100	ENSAPLG00000004816	ENSAPLT00000004961	ENSAPLT00000004961
XLOC_000053	TCONS_00000101	ENSAPLG00000004816	TCONS_00000101	ENSAPLT00000004961
XLOC_000054	TCONS_00000102	XLOC_000054	TCONS_00000102
XLOC_000055	TCONS_00000105	SUCO	ENSAPLT00000005004	ENSAPLT00000005004
XLOC_000055	TCONS_00000104	SUCO	TCONS_00000104	ENSAPLT00000005004
XLOC_000055	TCONS_00000103	SUCO	TCONS_00000103	ENSAPLT00000005004
XLOC_000056	TCONS_00000106	FASLG	ENSAPLT00000005520	ENSAPLT00000005520
XLOC_000057	TCONS_00000107	ENSAPLG00000005431	TCONS_00000107	ENSAPLT00000005602
XLOC_000057	TCONS_00000108	ENSAPLG00000005431	TCONS_00000108	ENSAPLT00000005602
XLOC_000057	TCONS_00000109	ENSAPLG00000005431	TCONS_00000109	ENSAPLT00000005602
XLOC_000058	TCONS_00000110	XLOC_000058	TCONS_00000110
XLOC_000058	TCONS_00000111	XLOC_000058	TCONS_00000111
XLOC_000058	TCONS_00000112	XLOC_000058	TCONS_00000112
XLOC_000058	TCONS_00000114	XLOC_000058	TCONS_00000114
XLOC_000058	TCONS_00000113	XLOC_000058	TCONS_00000113
XLOC_000058	TCONS_00000115	XLOC_000058	TCONS_00000115
XLOC_000059	TCONS_00000116	ENSAPLG00000002383	ENSAPLT00000002400	ENSAPLT00000002400
XLOC_000060	TCONS_00000117	ENSAPLG00000004197	ENSAPLT00000004297	ENSAPLT00000004297
XLOC_000061	TCONS_00000118	XLOC_000061	TCONS_00000118
XLOC_000062	TCONS_00000120	ENSAPLG00000000176	ENSAPLT00000000176	ENSAPLT00000000176
XLOC_000062	TCONS_00000119	ENSAPLG00000000176	TCONS_00000119	ENSAPLT00000000176
XLOC_000063	TCONS_00000122	ENSAPLG00000000205	ENSAPLT00000000205	ENSAPLT00000000205
XLOC_000063	TCONS_00000121	ENSAPLG00000000205	TCONS_00000121	ENSAPLT00000000205
XLOC_000064	TCONS_00000123	PIGC	ENSAPLT00000001593	ENSAPLT00000001593
XLOC_000064	TCONS_00000124	PIGC	TCONS_00000124	ENSAPLT00000001593
XLOC_000065	TCONS_00000126	XLOC_000065	TCONS_00000126
XLOC_000065	TCONS_00000125	XLOC_000065	TCONS_00000125
XLOC_000066	TCONS_00000127	XLOC_000066	TCONS_00000127
XLOC_000067	TCONS_00000128	ENSAPLG00000005431	ENSAPLT00000005602	ENSAPLT00000005602
XLOC_000068	TCONS_00000129	TADA1	ENSAPLT00000005616	ENSAPLT00000005616
XLOC_000069	TCONS_00000130	BEST3	TCONS_00000130	ENSAPLT00000013543
XLOC_000069	TCONS_00000131	BEST3	ENSAPLT00000013543	ENSAPLT00000013543
XLOC_000070	TCONS_00000132	LRRC10	ENSAPLT00000001389	ENSAPLT00000001389
XLOC_000071	TCONS_00000133	MYRFL	TCONS_00000133	ENSAPLT00000013373
XLOC_000071	TCONS_00000134	MYRFL	TCONS_00000134	ENSAPLT00000013373
XLOC_000071	TCONS_00000135	MYRFL	ENSAPLT00000013373	ENSAPLT00000013373
XLOC_000072	TCONS_00000136	ENSAPLG00000012894	ENSAPLT00000013447	ENSAPLT00000013447
XLOC_000073	TCONS_00000137	ENSAPLG00000013049	ENSAPLT00000013609	ENSAPLT00000013609
XLOC_000074	TCONS_00000138	CCT2	ENSAPLT00000013735	ENSAPLT00000013735
XLOC_000075	TCONS_00000139	FRS2	TCONS_00000139	ENSAPLT00000013783
XLOC_000075	TCONS_00000140	FRS2	ENSAPLT00000013783	ENSAPLT00000013783
XLOC_000076	TCONS_00000141	XLOC_000076	TCONS_00000141
XLOC_000077	TCONS_00000142	YEATS4	ENSAPLT00000013806	ENSAPLT00000013806
XLOC_000078	TCONS_00000143	LYZ	ENSAPLT00000013816	ENSAPLT00000013816
XLOC_000078	TCONS_00000144	LYZ	TCONS_00000144	ENSAPLT00000013816
XLOC_000079	TCONS_00000145	XLOC_000079	TCONS_00000145
XLOC_000080	TCONS_00000148	SASH1	ENSAPLT00000008063	ENSAPLT00000008063
XLOC_000080	TCONS_00000147	SASH1	TCONS_00000147	ENSAPLT00000008063
XLOC_000080	TCONS_00000146	SASH1	TCONS_00000146	ENSAPLT00000008063
XLOC_000080	TCONS_00000149	SASH1	TCONS_00000149	ENSAPLT00000008063
XLOC_000081	TCONS_00000150	XLOC_000081	TCONS_00000150
XLOC_000082	TCONS_00000151	UST	TCONS_00000151	ENSAPLT00000008351
XLOC_000082	TCONS_00000152	UST	TCONS_00000152	ENSAPLT00000008351
XLOC_000082	TCONS_00000153	UST	TCONS_00000153	ENSAPLT00000008351
XLOC_000082	TCONS_00000154	UST	ENSAPLT00000008351	ENSAPLT00000008351
XLOC_000083	TCONS_00000155	TAB2	TCONS_00000155	ENSAPLT00000008484
XLOC_000083	TCONS_00000156	TAB2	ENSAPLT00000008484	ENSAPLT00000008484
XLOC_000083	TCONS_00000157	TAB2	TCONS_00000157	ENSAPLT00000008484
XLOC_000084	TCONS_00000160	GINM1	TCONS_00000160	ENSAPLT00000009130
XLOC_000084	TCONS_00000161	GINM1	ENSAPLT00000009130	ENSAPLT00000009130
XLOC_000084	TCONS_00000159	GINM1	TCONS_00000159	ENSAPLT00000009130
XLOC_000084	TCONS_00000158	GINM1	TCONS_00000158	ENSAPLT00000009130
XLOC_000085	TCONS_00000162	PCMT1	ENSAPLT00000010192	ENSAPLT00000010192
XLOC_000085	TCONS_00000163	PCMT1	TCONS_00000163	ENSAPLT00000010192
XLOC_000086	TCONS_00000164	PPP1R14C	ENSAPLT00000010356	ENSAPLT00000010356
XLOC_000087	TCONS_00000165	IYD	TCONS_00000165	ENSAPLT00000010365
XLOC_000087	TCONS_00000166	IYD	ENSAPLT00000010365	ENSAPLT00000010365
XLOC_000088	TCONS_00000169	PLEKHG1	TCONS_00000169	ENSAPLT00000010514
XLOC_000088	TCONS_00000168	PLEKHG1	TCONS_00000168	ENSAPLT00000010514
XLOC_000088	TCONS_00000167	PLEKHG1	TCONS_00000167	ENSAPLT00000010514
XLOC_000088	TCONS_00000170	PLEKHG1	ENSAPLT00000010514	ENSAPLT00000010514
XLOC_000089	TCONS_00000171	MTHFD1L	TCONS_00000171	ENSAPLT00000010984
XLOC_000089	TCONS_00000172	MTHFD1L	ENSAPLT00000010984	ENSAPLT00000010984
XLOC_000090	TCONS_00000173	XLOC_000090	TCONS_00000173
XLOC_000091	TCONS_00000174	AKAP12	TCONS_00000174	ENSAPLT00000012288
XLOC_000091	TCONS_00000175	AKAP12	ENSAPLT00000012288	ENSAPLT00000012288
XLOC_000092	TCONS_00000176	XLOC_000092	TCONS_00000176
XLOC_000093	TCONS_00000177	C6orf211	ENSAPLT00000012416	ENSAPLT00000012416
XLOC_000093	TCONS_00000178	C6orf211	TCONS_00000178	ENSAPLT00000012416
XLOC_000094	TCONS_00000179	CCDC170	TCONS_00000179	ENSAPLT00000012426
XLOC_000094	TCONS_00000180	CCDC170	ENSAPLT00000012426	ENSAPLT00000012426
XLOC_000095	TCONS_00000181	XLOC_000095	TCONS_00000181
XLOC_000095	TCONS_00000182	XLOC_000095	TCONS_00000182
XLOC_000096	TCONS_00000183	XLOC_000096	TCONS_00000183
XLOC_000097	TCONS_00000185	ZC3H12D	ENSAPLT00000008703	ENSAPLT00000008703
XLOC_000097	TCONS_00000184	ZC3H12D	TCONS_00000184	ENSAPLT00000008703
XLOC_000098	TCONS_00000188	PPIL4	ENSAPLT00000008822	ENSAPLT00000008822
XLOC_000098	TCONS_00000187	PPIL4	TCONS_00000187	ENSAPLT00000008822
XLOC_000098	TCONS_00000186	PPIL4	TCONS_00000186	ENSAPLT00000008822
XLOC_000098	TCONS_00000189	PPIL4	TCONS_00000189	ENSAPLT00000008822
XLOC_000099	TCONS_00000190	KATNA1	ENSAPLT00000009282	ENSAPLT00000009282
XLOC_000099	TCONS_00000191	KATNA1	TCONS_00000191	ENSAPLT00000009282
XLOC_000100	TCONS_00000194	LATS1	ENSAPLT00000009777	ENSAPLT00000009777
XLOC_000100	TCONS_00000193	LATS1	TCONS_00000193	ENSAPLT00000009777
XLOC_000100	TCONS_00000192	LATS1	TCONS_00000192	ENSAPLT00000009777
XLOC_000101	TCONS_00000195	NUP43	ENSAPLT00000009946	ENSAPLT00000009946
XLOC_000101	TCONS_00000197	NUP43	TCONS_00000197	ENSAPLT00000009946
XLOC_000101	TCONS_00000196	NUP43	TCONS_00000196	ENSAPLT00000009946
XLOC_000102	TCONS_00000198	LRP11	TCONS_00000198	ENSAPLT00000010342
XLOC_000102	TCONS_00000199	LRP11	ENSAPLT00000010342	ENSAPLT00000010342
XLOC_000103	TCONS_00000200	ENSAPLG00000011815	ENSAPLT00000012286	ENSAPLT00000012286
XLOC_000104	TCONS_00000201	ZBTB2	ENSAPLT00000012292	ENSAPLT00000012292
XLOC_000104	TCONS_00000202	ZBTB2	TCONS_00000202	ENSAPLT00000012292
XLOC_000105	TCONS_00000203	RMND1	ENSAPLT00000012320	ENSAPLT00000012320
XLOC_000105	TCONS_00000204	RMND1	TCONS_00000204	ENSAPLT00000012320
XLOC_000106	TCONS_00000205	XLOC_000106	TCONS_00000205
XLOC_000107	TCONS_00000206	NDUFAF2	ENSAPLT00000010194	ENSAPLT00000010194
XLOC_000108	TCONS_00000207	DEPDC1B	TCONS_00000207	ENSAPLT00000010050
XLOC_000108	TCONS_00000208	DEPDC1B	ENSAPLT00000010050	ENSAPLT00000010050
XLOC_000109	TCONS_00000210	ELOVL7	ENSAPLT00000010063	ENSAPLT00000010063
XLOC_000109	TCONS_00000209	ELOVL7	TCONS_00000209	ENSAPLT00000010063
XLOC_000110	TCONS_00000211	ERCC8	ENSAPLT00000010121	ENSAPLT00000010121
XLOC_000111	TCONS_00000212	XLOC_000111	TCONS_00000212
XLOC_000112	TCONS_00000213	XLOC_000112	TCONS_00000213
XLOC_000113	TCONS_00000215	SORCS1	ENSAPLT00000005128	ENSAPLT00000005128
XLOC_000113	TCONS_00000214	SORCS1	TCONS_00000214	ENSAPLT00000005128
XLOC_000114	TCONS_00000216	ENSAPLG00000005363	ENSAPLT00000005533	ENSAPLT00000005533
XLOC_000115	TCONS_00000217	ITPRIP	TCONS_00000217	ENSAPLT00000006151
XLOC_000115	TCONS_00000218	ITPRIP	ENSAPLT00000006151	ENSAPLT00000006151
XLOC_000116	TCONS_00000220	ENSAPLG00000006084	TCONS_00000220	ENSAPLT00000006315
XLOC_000116	TCONS_00000219	ENSAPLG00000006084	TCONS_00000219	ENSAPLT00000006315
XLOC_000116	TCONS_00000221	ENSAPLG00000006007	ENSAPLT00000006223	ENSAPLT00000006223
XLOC_000116	TCONS_00000222	ENSAPLG00000006084	TCONS_00000222	ENSAPLT00000006315
XLOC_000116	TCONS_00000223	ENSAPLG00000006084	ENSAPLT00000006315	ENSAPLT00000006315
XLOC_000117	TCONS_00000225	COL17A1	TCONS_00000225	ENSAPLT00000006397
XLOC_000117	TCONS_00000224	COL17A1	TCONS_00000224	ENSAPLT00000006397
XLOC_000117	TCONS_00000226	COL17A1	ENSAPLT00000006397	ENSAPLT00000006397
XLOC_000118	TCONS_00000227	XLOC_000118	TCONS_00000227
XLOC_000118	TCONS_00000228	XLOC_000118	TCONS_00000228
XLOC_000119	TCONS_00000229	OBFC1	TCONS_00000229	ENSAPLT00000006921
XLOC_000119	TCONS_00000230	OBFC1	ENSAPLT00000006921	ENSAPLT00000006921
XLOC_000120	TCONS_00000231	ENSAPLG00000006686	ENSAPLT00000006930	ENSAPLT00000006930
XLOC_000120	TCONS_00000232	ENSAPLG00000006691	TCONS_00000232	ENSAPLT00000006940
XLOC_000120	TCONS_00000233	ENSAPLG00000006691	ENSAPLT00000006940	ENSAPLT00000006940
XLOC_000121	TCONS_00000234	XLOC_000121	TCONS_00000234
XLOC_000122	TCONS_00000235	ENSAPLG00000006698	ENSAPLT00000006945	ENSAPLT00000006945
XLOC_000123	TCONS_00000236	SORCS3	TCONS_00000236	ENSAPLT00000005583
XLOC_000123	TCONS_00000239	SORCS3	ENSAPLT00000005583	ENSAPLT00000005583
XLOC_000123	TCONS_00000238	SORCS3	TCONS_00000238	ENSAPLT00000005583
XLOC_000123	TCONS_00000237	SORCS3	TCONS_00000237	ENSAPLT00000005583
XLOC_000124	TCONS_00000241	CFAP58	ENSAPLT00000005932	ENSAPLT00000005932
XLOC_000124	TCONS_00000240	CFAP58	TCONS_00000240	ENSAPLT00000005932
XLOC_000124	TCONS_00000242	CFAP58	TCONS_00000242	ENSAPLT00000005932
XLOC_000125	TCONS_00000243	ENSAPLG00000005953	TCONS_00000243	ENSAPLT00000006168
XLOC_000125	TCONS_00000244	ENSAPLG00000005953	TCONS_00000244	ENSAPLT00000006168
XLOC_000125	TCONS_00000245	ENSAPLG00000005953	TCONS_00000245	ENSAPLT00000006168
XLOC_000125	TCONS_00000246	ENSAPLG00000005953	ENSAPLT00000006168	ENSAPLT00000006168
XLOC_000126	TCONS_00000249	SFR1	TCONS_00000249	ENSAPLT00000006386
XLOC_000126	TCONS_00000251	SFR1	ENSAPLT00000006386	ENSAPLT00000006386
XLOC_000126	TCONS_00000250	SFR1	TCONS_00000250	ENSAPLT00000006386
XLOC_000126	TCONS_00000248	SFR1	TCONS_00000248	ENSAPLT00000006386
XLOC_000126	TCONS_00000247	SFR1	TCONS_00000247	ENSAPLT00000006386
XLOC_000127	TCONS_00000253	SLK	TCONS_00000253	ENSAPLT00000006485
XLOC_000127	TCONS_00000252	SLK	TCONS_00000252	ENSAPLT00000006485
XLOC_000127	TCONS_00000254	SLK	ENSAPLT00000006485	ENSAPLT00000006485
XLOC_000128	TCONS_00000255	ENSAPLG00000006704	ENSAPLT00000006958	ENSAPLT00000006958
XLOC_000129	TCONS_00000257	NUFIP1	ENSAPLT00000005134	ENSAPLT00000005134
XLOC_000129	TCONS_00000256	NUFIP1	TCONS_00000256	ENSAPLT00000005134
XLOC_000130	TCONS_00000259	XLOC_000130	TCONS_00000259
XLOC_000130	TCONS_00000258	XLOC_000130	TCONS_00000258
XLOC_000131	TCONS_00000260	TSC22D1	ENSAPLT00000005311	ENSAPLT00000005311
XLOC_000131	TCONS_00000261	TSC22D1	TCONS_00000261	ENSAPLT00000005311
XLOC_000131	TCONS_00000262	XLOC_000131	TCONS_00000262
XLOC_000132	TCONS_00000263	ENSAPLG00000005163	ENSAPLT00000005322	ENSAPLT00000005322
XLOC_000133	TCONS_00000264	XLOC_000133	TCONS_00000264
XLOC_000134	TCONS_00000265	XLOC_000134	TCONS_00000265
XLOC_000135	TCONS_00000266	CCDC122	ENSAPLT00000005337	ENSAPLT00000005337
XLOC_000135	TCONS_00000267	CCDC122	ENSAPLT00000005340	ENSAPLT00000005340
XLOC_000136	TCONS_00000268	XLOC_000136	TCONS_00000268
XLOC_000137	TCONS_00000269	ENOX1	TCONS_00000269	ENSAPLT00000005382
XLOC_000137	TCONS_00000270	ENOX1	ENSAPLT00000005382	ENSAPLT00000005382
XLOC_000138	TCONS_00000272	EPSTI1	TCONS_00000272	ENSAPLT00000005561
XLOC_000138	TCONS_00000271	EPSTI1	TCONS_00000271	ENSAPLT00000005561
XLOC_000138	TCONS_00000273	EPSTI1	ENSAPLT00000005561	ENSAPLT00000005561
XLOC_000138	TCONS_00000274	EPSTI1	TCONS_00000274	ENSAPLT00000005561
XLOC_000139	TCONS_00000275	XLOC_000139	TCONS_00000275
XLOC_000140	TCONS_00000276	ENSAPLG00000005407	ENSAPLT00000005577	ENSAPLT00000005577
XLOC_000141	TCONS_00000277	XLOC_000141	TCONS_00000277
XLOC_000142	TCONS_00000278	TSC22D1	TCONS_00000278	ENSAPLT00000005311
XLOC_000143	TCONS_00000279	XLOC_000143	TCONS_00000279
XLOC_000144	TCONS_00000280	LACC1	ENSAPLT00000005329	ENSAPLT00000005329
XLOC_000144	TCONS_00000281	LACC1	TCONS_00000281	ENSAPLT00000005329
XLOC_000144	TCONS_00000282	LACC1	TCONS_00000282	ENSAPLT00000005329
XLOC_000144	TCONS_00000283	LACC1	TCONS_00000283	ENSAPLT00000005329
XLOC_000145	TCONS_00000284	DNAJC15	ENSAPLT00000005492	ENSAPLT00000005492
XLOC_000146	TCONS_00000285	XLOC_000146	TCONS_00000285
XLOC_000147	TCONS_00000286	TNFSF11	TCONS_00000286	ENSAPLT00000005591
XLOC_000147	TCONS_00000287	TNFSF11	ENSAPLT00000005591	ENSAPLT00000005591
XLOC_000148	TCONS_00000288	XLOC_000148	TCONS_00000288
XLOC_000149	TCONS_00000289	XLOC_000149	TCONS_00000289
XLOC_000150	TCONS_00000290	XLOC_000150	TCONS_00000290
XLOC_000151	TCONS_00000291	LHFPL2	ENSAPLT00000005481	ENSAPLT00000005481
XLOC_000152	TCONS_00000292	XLOC_000152	TCONS_00000292
XLOC_000153	TCONS_00000293	SORBS2	ENSAPLT00000009481	ENSAPLT00000009481
XLOC_000153	TCONS_00000297	SORBS2	TCONS_00000297	ENSAPLT00000009481
XLOC_000153	TCONS_00000298	SORBS2	TCONS_00000298	ENSAPLT00000009481
XLOC_000153	TCONS_00000296	SORBS2	TCONS_00000296	ENSAPLT00000009481
XLOC_000153	TCONS_00000295	SORBS2	TCONS_00000295	ENSAPLT00000009481
XLOC_000153	TCONS_00000294	SORBS2	TCONS_00000294	ENSAPLT00000009481
XLOC_000154	TCONS_00000299	PDLIM3	TCONS_00000299	ENSAPLT00000010349
XLOC_000154	TCONS_00000300	PDLIM3	ENSAPLT00000010349	ENSAPLT00000010349
XLOC_000155	TCONS_00000301	CCDC110	ENSAPLT00000010811	ENSAPLT00000010811
XLOC_000156	TCONS_00000302	UFSP2	ENSAPLT00000011066	ENSAPLT00000011066
XLOC_000157	TCONS_00000303	LRP2BP	ENSAPLT00000011315	ENSAPLT00000011315
XLOC_000157	TCONS_00000304	LRP2BP	TCONS_00000304	ENSAPLT00000011315
XLOC_000158	TCONS_00000305	SNX25	TCONS_00000305	ENSAPLT00000011461
XLOC_000159	TCONS_00000306	CFAP97	TCONS_00000306	ENSAPLT00000011645
XLOC_000159	TCONS_00000307	CFAP97	ENSAPLT00000011645	ENSAPLT00000011645
XLOC_000160	TCONS_00000308	XLOC_000160	TCONS_00000308
XLOC_000160	TCONS_00000309	XLOC_000160	TCONS_00000309
XLOC_000161	TCONS_00000310	XLOC_000161	TCONS_00000310
XLOC_000162	TCONS_00000311	XLOC_000162	TCONS_00000311
XLOC_000162	TCONS_00000312	XLOC_000162	TCONS_00000312
XLOC_000162	TCONS_00000313	XLOC_000162	TCONS_00000313
XLOC_000163	TCONS_00000314	ENSAPLG00000007257	TCONS_00000314	ENSAPLT00000007554
XLOC_000163	TCONS_00000315	ENSAPLG00000007257	ENSAPLT00000007554	ENSAPLT00000007554
XLOC_000163	TCONS_00000316	CYP4V2	ENSAPLT00000008204	ENSAPLT00000008204
XLOC_000164	TCONS_00000317	FAM149A	ENSAPLT00000009018	ENSAPLT00000009018
XLOC_000165	TCONS_00000318	TLR3	TCONS_00000318	ENSAPLT00000009346
XLOC_000165	TCONS_00000319	TLR3	ENSAPLT00000009346	ENSAPLT00000009346
XLOC_000166	TCONS_00000320	C4orf47	TCONS_00000320	ENSAPLT00000010843
XLOC_000166	TCONS_00000321	C4orf47	TCONS_00000321	ENSAPLT00000010843
XLOC_000166	TCONS_00000322	C4orf47	ENSAPLT00000010843	ENSAPLT00000010843
XLOC_000167	TCONS_00000323	ENSAPLG00000010866	ENSAPLT00000011306	ENSAPLT00000011306
XLOC_000168	TCONS_00000325	SNX25	ENSAPLT00000011461	ENSAPLT00000011461
XLOC_000168	TCONS_00000324	SNX25	TCONS_00000324	ENSAPLT00000011461
XLOC_000168	TCONS_00000326	SNX25	TCONS_00000326	ENSAPLT00000011461
XLOC_000169	TCONS_00000327	SLC25A4	ENSAPLT00000011699	ENSAPLT00000011699
XLOC_000169	TCONS_00000328	SLC25A4	TCONS_00000328	ENSAPLT00000011699
XLOC_000170	TCONS_00000329	ENSAPLG00000014350	ENSAPLT00000014944	ENSAPLT00000014944
XLOC_000171	TCONS_00000330	KIAA2022	TCONS_00000330	ENSAPLT00000007940
XLOC_000171	TCONS_00000331	KIAA2022	ENSAPLT00000007940	ENSAPLT00000007940
XLOC_000172	TCONS_00000332	RLIM	TCONS_00000332	ENSAPLT00000008184
XLOC_000172	TCONS_00000333	RLIM	TCONS_00000333	ENSAPLT00000008184
XLOC_000172	TCONS_00000334	RLIM	ENSAPLT00000008184	ENSAPLT00000008184
XLOC_000173	TCONS_00000335	ENSAPLG00000008068	ENSAPLT00000008364	ENSAPLT00000008364
XLOC_000174	TCONS_00000336	XLOC_000174	TCONS_00000336
XLOC_000175	TCONS_00000337	ENSAPLG00000008124	TCONS_00000337	ENSAPLT00000008426
XLOC_000175	TCONS_00000338	ENSAPLG00000008124	ENSAPLT00000008426	ENSAPLT00000008426
XLOC_000176	TCONS_00000340	ENSAPLG00000008517	ENSAPLT00000008847	ENSAPLT00000008847
XLOC_000176	TCONS_00000339	ENSAPLG00000008517	TCONS_00000339	ENSAPLT00000008847
XLOC_000177	TCONS_00000341	ENSAPLG00000008529	TCONS_00000341	ENSAPLT00000008874
XLOC_000177	TCONS_00000342	ENSAPLG00000008529	TCONS_00000342	ENSAPLT00000008874
XLOC_000177	TCONS_00000343	ENSAPLG00000008529	ENSAPLT00000008874	ENSAPLT00000008874
XLOC_000178	TCONS_00000344	SLC16A2	ENSAPLT00000008385	ENSAPLT00000008385
XLOC_000179	TCONS_00000345	ENSAPLG00000008335	ENSAPLT00000008685	ENSAPLT00000008685
XLOC_000180	TCONS_00000346	XLOC_000180	TCONS_00000346
XLOC_000181	TCONS_00000347	ENSAPLG00000008548	TCONS_00000347	ENSAPLT00000008908
XLOC_000181	TCONS_00000348	ENSAPLG00000008548	ENSAPLT00000008908	ENSAPLT00000008908
XLOC_000182	TCONS_00000349	CHIC1	ENSAPLT00000009426	ENSAPLT00000009426
XLOC_000183	TCONS_00000350	ENSAPLG00000009172	ENSAPLT00000009560	ENSAPLT00000009560
XLOC_000184	TCONS_00000351	ENSAPLG00000009237	ENSAPLT00000009606	ENSAPLT00000009606
XLOC_000185	TCONS_00000352	XLOC_000185	TCONS_00000352
XLOC_000186	TCONS_00000355	ENSAPLG00000009277	TCONS_00000355	ENSAPLT00000009682
XLOC_000186	TCONS_00000354	ENSAPLG00000009277	TCONS_00000354	ENSAPLT00000009682
XLOC_000186	TCONS_00000353	ENSAPLG00000009277	TCONS_00000353	ENSAPLT00000009682
XLOC_000186	TCONS_00000356	ENSAPLG00000009277	ENSAPLT00000009682	ENSAPLT00000009682
XLOC_000187	TCONS_00000357	ENSAPLG00000009277	TCONS_00000357	ENSAPLT00000009682
XLOC_000188	TCONS_00000359	2012-09-01	ENSAPLT00000001897	ENSAPLT00000001897
XLOC_000188	TCONS_00000358	2012-09-01	TCONS_00000358	ENSAPLT00000001897
XLOC_000189	TCONS_00000360	ENSAPLG00000001700	ENSAPLT00000001693	ENSAPLT00000001693
XLOC_000190	TCONS_00000361	ENSAPLG00000002398	ENSAPLT00000002439	ENSAPLT00000002439
XLOC_000190	TCONS_00000362	ENSAPLG00000002398	TCONS_00000362	ENSAPLT00000002439
XLOC_000191	TCONS_00000364	TTC18	ENSAPLT00000002879	ENSAPLT00000002879
XLOC_000191	TCONS_00000363	TTC18	TCONS_00000363	ENSAPLT00000002879
XLOC_000192	TCONS_00000365	WDR90	ENSAPLT00000003052	ENSAPLT00000003052
XLOC_000193	TCONS_00000366	RHOT2	ENSAPLT00000003741	ENSAPLT00000003741
XLOC_000193	TCONS_00000367	RHOT2	TCONS_00000367	ENSAPLT00000003741
XLOC_000194	TCONS_00000370	XLOC_000194	TCONS_00000370
XLOC_000194	TCONS_00000371	XLOC_000194	TCONS_00000371
XLOC_000194	TCONS_00000369	XLOC_000194	TCONS_00000369
XLOC_000194	TCONS_00000368	XLOC_000194	TCONS_00000368
XLOC_000195	TCONS_00000372	STUB1	ENSAPLT00000004354	ENSAPLT00000004354
XLOC_000196	TCONS_00000374	FAM173A	ENSAPLT00000004772	ENSAPLT00000004772
XLOC_000196	TCONS_00000373	FAM173A	TCONS_00000373	ENSAPLT00000004772
XLOC_000196	TCONS_00000375	FAM173A	ENSAPLT00000004775	ENSAPLT00000004775
XLOC_000197	TCONS_00000376	IGFALS	ENSAPLT00000004998	ENSAPLT00000004998
XLOC_000198	TCONS_00000377	SPSB3	ENSAPLT00000005240	ENSAPLT00000005240
XLOC_000198	TCONS_00000378	SPSB3	TCONS_00000378	ENSAPLT00000005240
XLOC_000199	TCONS_00000379	NME3	ENSAPLT00000005485	ENSAPLT00000005485
XLOC_000199	TCONS_00000380	NME3	TCONS_00000380	ENSAPLT00000005485
XLOC_000200	TCONS_00000381	MSS51	ENSAPLT00000002737	ENSAPLT00000002737
XLOC_000201	TCONS_00000383	WDR24	ENSAPLT00000004421	ENSAPLT00000004421
XLOC_000201	TCONS_00000382	WDR24	TCONS_00000382	ENSAPLT00000004421
XLOC_000202	TCONS_00000384	FBXL16	ENSAPLT00000004765	ENSAPLT00000004765
XLOC_000203	TCONS_00000387	CCDC78	ENSAPLT00000004922	ENSAPLT00000004922
XLOC_000203	TCONS_00000386	CCDC78	TCONS_00000386	ENSAPLT00000004922
XLOC_000203	TCONS_00000385	CCDC78	TCONS_00000385	ENSAPLT00000004922
XLOC_000203	TCONS_00000388	CCDC78	ENSAPLT00000004930	ENSAPLT00000004930
XLOC_000203	TCONS_00000389	CCDC78	ENSAPLT00000004935	ENSAPLT00000004935
XLOC_000204	TCONS_00000390	NUBP2	ENSAPLT00000005053	ENSAPLT00000005053
XLOC_000205	TCONS_00000391	EME2	ENSAPLT00000005413	ENSAPLT00000005413
XLOC_000206	TCONS_00000393	WDR60	ENSAPLT00000015690	ENSAPLT00000015690
XLOC_000206	TCONS_00000392	WDR60	TCONS_00000392	ENSAPLT00000015690
XLOC_000207	TCONS_00000395	ZMYND11	ENSAPLT00000016210	ENSAPLT00000016210
XLOC_000207	TCONS_00000394	ZMYND11	TCONS_00000394	ENSAPLT00000016210
XLOC_000207	TCONS_00000396	ZMYND11	TCONS_00000396	ENSAPLT00000016210
XLOC_000208	TCONS_00000399	ENSAPLG00000013939	TCONS_00000399	ENSAPLT00000014517
XLOC_000208	TCONS_00000398	ENSAPLG00000013939	TCONS_00000398	ENSAPLT00000014517
XLOC_000208	TCONS_00000397	ENSAPLG00000013939	TCONS_00000397	ENSAPLT00000014517
XLOC_000208	TCONS_00000400	ENSAPLG00000013939	ENSAPLT00000014517	ENSAPLT00000014517
XLOC_000209	TCONS_00000401	XLOC_000209	TCONS_00000401
XLOC_000210	TCONS_00000403	NCAPG2	TCONS_00000403	ENSAPLT00000014604
XLOC_000210	TCONS_00000402	NCAPG2	TCONS_00000402	ENSAPLT00000014604
XLOC_000210	TCONS_00000404	NCAPG2	ENSAPLT00000014604	ENSAPLT00000014604
XLOC_000211	TCONS_00000405	ESYT2	TCONS_00000405	ENSAPLT00000015032
XLOC_000211	TCONS_00000406	ESYT2	ENSAPLT00000015032	ENSAPLT00000015032
XLOC_000212	TCONS_00000407	XLOC_000212	TCONS_00000407
XLOC_000213	TCONS_00000408	VIPR2	TCONS_00000408	ENSAPLT00000015927
XLOC_000213	TCONS_00000409	VIPR2	ENSAPLT00000015927	ENSAPLT00000015927
XLOC_000214	TCONS_00000410	ENSAPLG00000015485	ENSAPLT00000016129	ENSAPLT00000016129
XLOC_000215	TCONS_00000411	DIP2C	ENSAPLT00000002549	ENSAPLT00000002549
XLOC_000215	TCONS_00000412	DIP2C	TCONS_00000412	ENSAPLT00000002549
XLOC_000216	TCONS_00000413	LARP4B	TCONS_00000413	ENSAPLT00000003940
XLOC_000216	TCONS_00000414	LARP4B	TCONS_00000414	ENSAPLT00000003940
XLOC_000216	TCONS_00000415	LARP4B	ENSAPLT00000003940	ENSAPLT00000003940
XLOC_000217	TCONS_00000416	XLOC_000217	TCONS_00000416
XLOC_000218	TCONS_00000417	UGCG	ENSAPLT00000012447	ENSAPLT00000012447
XLOC_000219	TCONS_00000418	MYO16	ENSAPLT00000007924	ENSAPLT00000007924
XLOC_000219	TCONS_00000419	MYO16	TCONS_00000419	ENSAPLT00000007924
XLOC_000220	TCONS_00000420	XLOC_000220	TCONS_00000420
XLOC_000221	TCONS_00000421	XLOC_000221	TCONS_00000421
XLOC_000221	TCONS_00000422	XLOC_000221	TCONS_00000422
XLOC_000222	TCONS_00000423	ENSAPLG00000009274	ENSAPLT00000009652	ENSAPLT00000009652
XLOC_000223	TCONS_00000424	XLOC_000223	TCONS_00000424
XLOC_000224	TCONS_00000425	COL4A2	TCONS_00000425	ENSAPLT00000010112
XLOC_000224	TCONS_00000426	COL4A2	ENSAPLT00000010112	ENSAPLT00000010112
XLOC_000225	TCONS_00000427	ENSAPLG00000000838	ENSAPLT00000000812	ENSAPLT00000000812
XLOC_000225	TCONS_00000428	CARKD	TCONS_00000428	ENSAPLT00000012313
XLOC_000225	TCONS_00000429	CARKD	ENSAPLT00000012313	ENSAPLT00000012313
XLOC_000226	TCONS_00000430	XLOC_000226	TCONS_00000430
XLOC_000227	TCONS_00000431	ENSAPLG00000008253	TCONS_00000431	ENSAPLT00000008561
XLOC_000227	TCONS_00000432	ENSAPLG00000008253	TCONS_00000432	ENSAPLT00000008561
XLOC_000227	TCONS_00000433	ENSAPLG00000008253	ENSAPLT00000008561	ENSAPLT00000008561
XLOC_000228	TCONS_00000434	XLOC_000228	TCONS_00000434
XLOC_000229	TCONS_00000435	XLOC_000229	TCONS_00000435
XLOC_000230	TCONS_00000437	COL4A1	ENSAPLT00000008790	ENSAPLT00000008790
XLOC_000230	TCONS_00000436	COL4A1	TCONS_00000436	ENSAPLT00000008790
XLOC_000230	TCONS_00000438	COL4A1	TCONS_00000438	ENSAPLT00000008790
XLOC_000231	TCONS_00000439	RAB20	ENSAPLT00000012218	ENSAPLT00000012218
XLOC_000232	TCONS_00000440	XLOC_000232	TCONS_00000440
XLOC_000233	TCONS_00000441	XLOC_000233	TCONS_00000441
XLOC_000234	TCONS_00000442	XLOC_000234	TCONS_00000442
XLOC_000235	TCONS_00000443	XLOC_000235	TCONS_00000443
XLOC_000236	TCONS_00000444	XLOC_000236	TCONS_00000444
XLOC_000237	TCONS_00000445	XLOC_000237	TCONS_00000445
XLOC_000238	TCONS_00000446	XLOC_000238	TCONS_00000446
XLOC_000239	TCONS_00000447	XLOC_000239	TCONS_00000447
XLOC_000240	TCONS_00000448	XLOC_000240	TCONS_00000448
XLOC_000241	TCONS_00000449	XLOC_000241	TCONS_00000449
XLOC_000242	TCONS_00000450	XLOC_000242	TCONS_00000450
XLOC_000243	TCONS_00000451	XLOC_000243	TCONS_00000451
XLOC_000244	TCONS_00000452	XLOC_000244	TCONS_00000452
XLOC_000245	TCONS_00000453	XLOC_000245	TCONS_00000453
XLOC_000246	TCONS_00000454	GNAO1	ENSAPLT00000011491	ENSAPLT00000011491
XLOC_000246	TCONS_00000455	GNAO1	TCONS_00000455	ENSAPLT00000011491
XLOC_000247	TCONS_00000456	XLOC_000247	TCONS_00000456
XLOC_000248	TCONS_00000457	OGFOD1	ENSAPLT00000012802	ENSAPLT00000012802
XLOC_000249	TCONS_00000458	XLOC_000249	TCONS_00000458
XLOC_000250	TCONS_00000459	MT1	ENSAPLT00000013914	ENSAPLT00000013914
XLOC_000251	TCONS_00000460	XLOC_000251	TCONS_00000460
XLOC_000252	TCONS_00000463	NUP93	TCONS_00000463	ENSAPLT00000014675
XLOC_000252	TCONS_00000465	NUP93	ENSAPLT00000014675	ENSAPLT00000014675
XLOC_000252	TCONS_00000464	NUP93	TCONS_00000464	ENSAPLT00000014675
XLOC_000252	TCONS_00000462	NUP93	TCONS_00000462	ENSAPLT00000014675
XLOC_000252	TCONS_00000461	NUP93	TCONS_00000461	ENSAPLT00000014675
XLOC_000253	TCONS_00000466	ENSAPLG00000000443	ENSAPLT00000000443	ENSAPLT00000000443
XLOC_000254	TCONS_00000467	SLC12A3	ENSAPLT00000015304	ENSAPLT00000015304
XLOC_000255	TCONS_00000468	CFDP1	TCONS_00000468	ENSAPLT00000015673
XLOC_000255	TCONS_00000469	CFDP1	ENSAPLT00000015673	ENSAPLT00000015673
XLOC_000255	TCONS_00000470	CFDP1	TCONS_00000470	ENSAPLT00000015673
XLOC_000256	TCONS_00000473	BCAR1	ENSAPLT00000015696	ENSAPLT00000015696
XLOC_000256	TCONS_00000472	BCAR1	TCONS_00000472	ENSAPLT00000015696
XLOC_000256	TCONS_00000471	BCAR1	TCONS_00000471	ENSAPLT00000015696
XLOC_000257	TCONS_00000474	WDR59	TCONS_00000474	ENSAPLT00000016420
XLOC_000257	TCONS_00000475	WDR59	ENSAPLT00000016420	ENSAPLT00000016420
XLOC_000258	TCONS_00000476	FA2H	ENSAPLT00000016812	ENSAPLT00000016812
XLOC_000258	TCONS_00000477	FA2H	TCONS_00000477	ENSAPLT00000016812
XLOC_000259	TCONS_00000478	MLKL	TCONS_00000478	ENSAPLT00000016830
XLOC_000259	TCONS_00000479	MLKL	ENSAPLT00000016830	ENSAPLT00000016830
XLOC_000260	TCONS_00000480	RFWD3	TCONS_00000480	ENSAPLT00000016860
XLOC_000260	TCONS_00000481	RFWD3	ENSAPLT00000016860	ENSAPLT00000016860
XLOC_000261	TCONS_00000482	GLG1	ENSAPLT00000016956	ENSAPLT00000016956
XLOC_000262	TCONS_00000483	XLOC_000262	TCONS_00000483
XLOC_000263	TCONS_00000484	PDPR	TCONS_00000484	ENSAPLT00000002913
XLOC_000263	TCONS_00000486	PDPR	ENSAPLT00000002913	ENSAPLT00000002913
XLOC_000263	TCONS_00000485	PDPR	TCONS_00000485	ENSAPLT00000002913
XLOC_000264	TCONS_00000487	FUK	TCONS_00000487	ENSAPLT00000004147
XLOC_000264	TCONS_00000489	FUK	ENSAPLT00000004147	ENSAPLT00000004147
XLOC_000264	TCONS_00000488	FUK	TCONS_00000488	ENSAPLT00000004147
XLOC_000265	TCONS_00000490	ENSAPLG00000004996	ENSAPLT00000005183	ENSAPLT00000005183
XLOC_000266	TCONS_00000491	SNORD111	ENSAPLT00000000378	ENSAPLT00000000378
XLOC_000267	TCONS_00000492	SNORD111	ENSAPLT00000000301	ENSAPLT00000000301
XLOC_000268	TCONS_00000493	ENSAPLG00000011025	ENSAPLT00000011467	ENSAPLT00000011467
XLOC_000269	TCONS_00000494	AMFR	ENSAPLT00000011911	ENSAPLT00000011911
XLOC_000270	TCONS_00000495	NUDT21	ENSAPLT00000012649	ENSAPLT00000012649
XLOC_000271	TCONS_00000496	BBS2	ENSAPLT00000013155	ENSAPLT00000013155
XLOC_000272	TCONS_00000497	BBS2	TCONS_00000497	ENSAPLT00000013155
XLOC_000273	TCONS_00000498	ENSAPLG00000014893	ENSAPLT00000015512	ENSAPLT00000015512
XLOC_000274	TCONS_00000499	ENSAPLG00000015444	ENSAPLT00000016111	ENSAPLT00000016111
XLOC_000275	TCONS_00000500	ZNRF1	TCONS_00000500	ENSAPLT00000016335
XLOC_000275	TCONS_00000501	ZNRF1	ENSAPLT00000016335	ENSAPLT00000016335
XLOC_000276	TCONS_00000502	XLOC_000276	TCONS_00000502
XLOC_000277	TCONS_00000503	XLOC_000277	TCONS_00000503
XLOC_000278	TCONS_00000504	XLOC_000278	TCONS_00000504
XLOC_000279	TCONS_00000505	XLOC_000279	TCONS_00000505
XLOC_000280	TCONS_00000507	ST3GAL2	ENSAPLT00000003808	ENSAPLT00000003808
XLOC_000280	TCONS_00000506	ST3GAL2	TCONS_00000506	ENSAPLT00000003808
XLOC_000281	TCONS_00000508	COG4	ENSAPLT00000004497	ENSAPLT00000004497
XLOC_000282	TCONS_00000509	XLOC_000282	TCONS_00000509
XLOC_000283	TCONS_00000510	XLOC_000283	TCONS_00000510
XLOC_000284	TCONS_00000511	XLOC_000284	TCONS_00000511
XLOC_000285	TCONS_00000512	XLOC_000285	TCONS_00000512
XLOC_000286	TCONS_00000513	XLOC_000286	TCONS_00000513
XLOC_000287	TCONS_00000514	XLOC_000287	TCONS_00000514
XLOC_000288	TCONS_00000515	XLOC_000288	TCONS_00000515
XLOC_000289	TCONS_00000516	ENSAPLG00000012965	ENSAPLT00000013490	ENSAPLT00000013490
XLOC_000290	TCONS_00000517	SLC25A16	ENSAPLT00000015843	ENSAPLT00000015843
XLOC_000291	TCONS_00000520	DNA2	TCONS_00000520	ENSAPLT00000016279
XLOC_000291	TCONS_00000521	DNA2	ENSAPLT00000016279	ENSAPLT00000016279
XLOC_000291	TCONS_00000519	DNA2	TCONS_00000519	ENSAPLT00000016279
XLOC_000291	TCONS_00000518	DNA2	TCONS_00000518	ENSAPLT00000016279
XLOC_000292	TCONS_00000522	RUFY2	ENSAPLT00000016535	ENSAPLT00000016535
XLOC_000293	TCONS_00000524	PBLD	ENSAPLT00000002411	ENSAPLT00000002411
XLOC_000293	TCONS_00000523	PBLD	TCONS_00000523	ENSAPLT00000002411
XLOC_000293	TCONS_00000525	PBLD	TCONS_00000525	ENSAPLT00000002411
XLOC_000294	TCONS_00000526	ATOH7	ENSAPLT00000000710	ENSAPLT00000000710
XLOC_000295	TCONS_00000527	HERC4	TCONS_00000527	ENSAPLT00000002904
XLOC_000295	TCONS_00000528	HERC4	ENSAPLT00000002904	ENSAPLT00000002904
XLOC_000296	TCONS_00000529	DNAJC12	TCONS_00000529	ENSAPLT00000004724
XLOC_000296	TCONS_00000530	DNAJC12	ENSAPLT00000004724	ENSAPLT00000004724
XLOC_000297	TCONS_00000531	CTNNA3	ENSAPLT00000005030	ENSAPLT00000005030
XLOC_000297	TCONS_00000532	CTNNA3	TCONS_00000532	ENSAPLT00000005030
XLOC_000297	TCONS_00000533	CTNNA3	TCONS_00000533	ENSAPLT00000005030
XLOC_000298	TCONS_00000534	HK1	TCONS_00000534	ENSAPLT00000010438
XLOC_000298	TCONS_00000535	HK1	TCONS_00000535	ENSAPLT00000010438
XLOC_000298	TCONS_00000536	HK1	TCONS_00000536	ENSAPLT00000010438
XLOC_000298	TCONS_00000537	HK1	ENSAPLT00000010438	ENSAPLT00000010438
XLOC_000299	TCONS_00000538	HKDC1	TCONS_00000538	ENSAPLT00000011966
XLOC_000299	TCONS_00000539	HKDC1	ENSAPLT00000011966	ENSAPLT00000011966
XLOC_000299	TCONS_00000540	HKDC1	TCONS_00000540	ENSAPLT00000011966
XLOC_000300	TCONS_00000541	SUPV3L1	ENSAPLT00000012809	ENSAPLT00000012809
XLOC_000301	TCONS_00000542	VPS26A	ENSAPLT00000013104	ENSAPLT00000013104
XLOC_000302	TCONS_00000543	SRGN	ENSAPLT00000013488	ENSAPLT00000013488
XLOC_000302	TCONS_00000545	SRGN	TCONS_00000545	ENSAPLT00000013488
XLOC_000302	TCONS_00000544	SRGN	TCONS_00000544	ENSAPLT00000013488
XLOC_000303	TCONS_00000546	KIAA1279	TCONS_00000546	ENSAPLT00000013509
XLOC_000303	TCONS_00000548	KIAA1279	ENSAPLT00000013509	ENSAPLT00000013509
XLOC_000303	TCONS_00000547	KIAA1279	TCONS_00000547	ENSAPLT00000013509
XLOC_000304	TCONS_00000549	ENSAPLG00000013000	ENSAPLT00000013530	ENSAPLT00000013530
XLOC_000305	TCONS_00000550	DDX21	ENSAPLT00000013616	ENSAPLT00000013616
XLOC_000306	TCONS_00000551	STOX1	ENSAPLT00000014439	ENSAPLT00000014439
XLOC_000307	TCONS_00000553	CCAR1	TCONS_00000553	ENSAPLT00000014530
XLOC_000307	TCONS_00000552	CCAR1	TCONS_00000552	ENSAPLT00000014530
XLOC_000307	TCONS_00000554	CCAR1	ENSAPLT00000014530	ENSAPLT00000014530
XLOC_000308	TCONS_00000555	SNORD98	ENSAPLT00000000327	ENSAPLT00000000327
XLOC_000309	TCONS_00000556	TET1	TCONS_00000556	ENSAPLT00000015806
XLOC_000309	TCONS_00000557	TET1	TCONS_00000557	ENSAPLT00000015806
XLOC_000309	TCONS_00000558	TET1	ENSAPLT00000015806	ENSAPLT00000015806
XLOC_000310	TCONS_00000559	HNRNPH3	ENSAPLT00000001187	ENSAPLT00000001187
XLOC_000310	TCONS_00000560	HNRNPH3	TCONS_00000560	ENSAPLT00000001187
XLOC_000311	TCONS_00000561	MYPN	TCONS_00000561	ENSAPLT00000002660
XLOC_000311	TCONS_00000562	MYPN	ENSAPLT00000002660	ENSAPLT00000002660
XLOC_000311	TCONS_00000563	MYPN	TCONS_00000563	ENSAPLT00000002660
XLOC_000312	TCONS_00000564	SIRT1	ENSAPLT00000004445	ENSAPLT00000004445
XLOC_000313	TCONS_00000565	LRRTM3	TCONS_00000565	ENSAPLT00000005357
XLOC_000313	TCONS_00000566	LRRTM3	ENSAPLT00000005357	ENSAPLT00000005357
XLOC_000314	TCONS_00000567	XLOC_000314	TCONS_00000567
XLOC_000314	TCONS_00000568	XLOC_000314	TCONS_00000568
XLOC_000314	TCONS_00000569	XLOC_000314	TCONS_00000569
XLOC_000315	TCONS_00000570	XLOC_000315	TCONS_00000570
XLOC_000316	TCONS_00000571	XLOC_000316	TCONS_00000571
XLOC_000317	TCONS_00000572	XLOC_000317	TCONS_00000572
XLOC_000318	TCONS_00000573	XLOC_000318	TCONS_00000573
XLOC_000319	TCONS_00000574	RALYL	TCONS_00000574	ENSAPLT00000016241
XLOC_000319	TCONS_00000575	RALYL	ENSAPLT00000016241	ENSAPLT00000016241
XLOC_000319	TCONS_00000576	RALYL	ENSAPLT00000016243	ENSAPLT00000016243
XLOC_000320	TCONS_00000577	LRRCC1	ENSAPLT00000016663	ENSAPLT00000016663
XLOC_000320	TCONS_00000579	LRRCC1	TCONS_00000579	ENSAPLT00000016663
XLOC_000320	TCONS_00000578	LRRCC1	TCONS_00000578	ENSAPLT00000016663
XLOC_000321	TCONS_00000580	E2F5	ENSAPLT00000016807	ENSAPLT00000016807
XLOC_000321	TCONS_00000581	E2F5	TCONS_00000581	ENSAPLT00000016807
XLOC_000322	TCONS_00000582	CA13	TCONS_00000582	ENSAPLT00000016897
XLOC_000322	TCONS_00000583	CA13	ENSAPLT00000016897	ENSAPLT00000016897
XLOC_000322	TCONS_00000584	CA13	TCONS_00000584	ENSAPLT00000016897
XLOC_000323	TCONS_00000585	ENSAPLG00000002416	ENSAPLT00000002436	ENSAPLT00000002436
XLOC_000324	TCONS_00000586	U1	ENSAPLT00000000218	ENSAPLT00000000218
XLOC_000325	TCONS_00000587	XLOC_000325	TCONS_00000587
XLOC_000326	TCONS_00000588	XLOC_000326	TCONS_00000588
XLOC_000327	TCONS_00000589	SLC7A13	ENSAPLT00000016334	ENSAPLT00000016334
XLOC_000328	TCONS_00000590	XLOC_000328	TCONS_00000590
XLOC_000328	TCONS_00000591	XLOC_000328	TCONS_00000591
XLOC_000329	TCONS_00000592	ENSAPLG00000000934	ENSAPLT00000000977	ENSAPLT00000000977
XLOC_000330	TCONS_00000593	TMEM204	ENSAPLT00000011731	ENSAPLT00000011731
XLOC_000331	TCONS_00000595	ENSAPLG00000011339	TCONS_00000595	ENSAPLT00000011810
XLOC_000331	TCONS_00000594	ENSAPLG00000011339	TCONS_00000594	ENSAPLT00000011810
XLOC_000331	TCONS_00000596	ENSAPLG00000011339	ENSAPLT00000011810	ENSAPLT00000011810
XLOC_000332	TCONS_00000598	HN1L	ENSAPLT00000012352	ENSAPLT00000012352
XLOC_000332	TCONS_00000597	HN1L	TCONS_00000597	ENSAPLT00000012352
XLOC_000333	TCONS_00000599	TMEM186	ENSAPLT00000012457	ENSAPLT00000012457
XLOC_000334	TCONS_00000600	CARHSP1	TCONS_00000600	ENSAPLT00000012480
XLOC_000334	TCONS_00000601	CARHSP1	TCONS_00000601	ENSAPLT00000012480
XLOC_000334	TCONS_00000602	CARHSP1	ENSAPLT00000012480	ENSAPLT00000012480
XLOC_000335	TCONS_00000603	CARHSP1	TCONS_00000603	ENSAPLT00000012480
XLOC_000336	TCONS_00000604	TMEM114	ENSAPLT00000013786	ENSAPLT00000013786
XLOC_000337	TCONS_00000605	XLOC_000337	TCONS_00000605
XLOC_000338	TCONS_00000606	XLOC_000338	TCONS_00000606
XLOC_000339	TCONS_00000607	XLOC_000339	TCONS_00000607
XLOC_000340	TCONS_00000608	XLOC_000340	TCONS_00000608
XLOC_000341	TCONS_00000609	XLOC_000341	TCONS_00000609
XLOC_000342	TCONS_00000610	XLOC_000342	TCONS_00000610
XLOC_000343	TCONS_00000611	XLOC_000343	TCONS_00000611
XLOC_000344	TCONS_00000612	XLOC_000344	TCONS_00000612
XLOC_000345	TCONS_00000613	XLOC_000345	TCONS_00000613
XLOC_000346	TCONS_00000614	XLOC_000346	TCONS_00000614
XLOC_000347	TCONS_00000615	XLOC_000347	TCONS_00000615
XLOC_000348	TCONS_00000616	ENSAPLG00000013376	ENSAPLT00000013926	ENSAPLT00000013926
XLOC_000349	TCONS_00000617	MRPS34	ENSAPLT00000014774	ENSAPLT00000014774
XLOC_000350	TCONS_00000618	C16ORF72	TCONS_00000618	ENSAPLT00000016250
XLOC_000350	TCONS_00000619	C16ORF72	ENSAPLT00000016250	ENSAPLT00000016250
XLOC_000350	TCONS_00000620	C16ORF72	ENSAPLT00000016254	ENSAPLT00000016254
XLOC_000351	TCONS_00000621	XLOC_000351	TCONS_00000621
XLOC_000352	TCONS_00000622	XLOC_000352	TCONS_00000622
XLOC_000353	TCONS_00000623	XLOC_000353	TCONS_00000623
XLOC_000354	TCONS_00000624	XLOC_000354	TCONS_00000624
XLOC_000355	TCONS_00000625	XLOC_000355	TCONS_00000625
XLOC_000356	TCONS_00000626	ENSAPLG00000011283	ENSAPLT00000011743	ENSAPLT00000011743
XLOC_000357	TCONS_00000628	PMM2	ENSAPLT00000012505	ENSAPLT00000012505
XLOC_000357	TCONS_00000627	PMM2	TCONS_00000627	ENSAPLT00000012505
XLOC_000357	TCONS_00000629	PMM2	TCONS_00000629	ENSAPLT00000012505
XLOC_000358	TCONS_00000630	ABAT	TCONS_00000630	ENSAPLT00000012859
XLOC_000358	TCONS_00000631	ABAT	ENSAPLT00000012859	ENSAPLT00000012859
XLOC_000359	TCONS_00000632	METTL22	TCONS_00000632	ENSAPLT00000013590
XLOC_000359	TCONS_00000635	METTL22	ENSAPLT00000013590	ENSAPLT00000013590
XLOC_000359	TCONS_00000634	METTL22	TCONS_00000634	ENSAPLT00000013590
XLOC_000360	TCONS_00000633	XLOC_000360	TCONS_00000633
XLOC_000361	TCONS_00000636	XLOC_000361	TCONS_00000636
XLOC_000362	TCONS_00000637	XLOC_000362	TCONS_00000637
XLOC_000363	TCONS_00000639	RBFOX1	TCONS_00000639	ENSAPLT00000013817
XLOC_000363	TCONS_00000638	RBFOX1	TCONS_00000638	ENSAPLT00000013817
XLOC_000363	TCONS_00000640	RBFOX1	ENSAPLT00000013817	ENSAPLT00000013817
XLOC_000364	TCONS_00000641	XLOC_000364	TCONS_00000641
XLOC_000365	TCONS_00000642	XLOC_000365	TCONS_00000642
XLOC_000366	TCONS_00000643	XLOC_000366	TCONS_00000643
XLOC_000367	TCONS_00000644	XLOC_000367	TCONS_00000644
XLOC_000368	TCONS_00000645	XLOC_000368	TCONS_00000645
XLOC_000369	TCONS_00000646	XLOC_000369	TCONS_00000646
XLOC_000370	TCONS_00000647	XLOC_000370	TCONS_00000647
XLOC_000371	TCONS_00000648	XLOC_000371	TCONS_00000648
XLOC_000372	TCONS_00000649	XLOC_000372	TCONS_00000649
XLOC_000373	TCONS_00000650	ENSAPLG00000000863	ENSAPLT00000000841	ENSAPLT00000000841
XLOC_000374	TCONS_00000651	XLOC_000374	TCONS_00000651
XLOC_000375	TCONS_00000653	ROGDI	ENSAPLT00000013945	ENSAPLT00000013945
XLOC_000375	TCONS_00000652	ROGDI	TCONS_00000652	ENSAPLT00000013945
XLOC_000376	TCONS_00000654	ENSAPLG00000013687	ENSAPLT00000014249	ENSAPLT00000014249
XLOC_000377	TCONS_00000655	GLYR1	ENSAPLT00000014335	ENSAPLT00000014335
XLOC_000377	TCONS_00000656	GLYR1	TCONS_00000656	ENSAPLT00000014335
XLOC_000377	TCONS_00000657	GLYR1	TCONS_00000657	ENSAPLT00000014335
XLOC_000378	TCONS_00000658	XLOC_000378	TCONS_00000658
XLOC_000379	TCONS_00000659	MAPK8IP3	TCONS_00000659	ENSAPLT00000014877
XLOC_000379	TCONS_00000660	MAPK8IP3	TCONS_00000660	ENSAPLT00000014877
XLOC_000379	TCONS_00000661	MAPK8IP3	ENSAPLT00000014877	ENSAPLT00000014877
XLOC_000380	TCONS_00000662	USP7	ENSAPLT00000015845	ENSAPLT00000015845
XLOC_000380	TCONS_00000663	USP7	TCONS_00000663	ENSAPLT00000015845
XLOC_000380	TCONS_00000665	USP7	TCONS_00000665	ENSAPLT00000015845
XLOC_000380	TCONS_00000664	USP7	TCONS_00000664	ENSAPLT00000015845
XLOC_000380	TCONS_00000666	USP7	ENSAPLT00000015848	ENSAPLT00000015848
XLOC_000381	TCONS_00000667	XLOC_000381	TCONS_00000667
XLOC_000382	TCONS_00000668	ENSAPLG00000015623	ENSAPLT00000016276	ENSAPLT00000016276
XLOC_000382	TCONS_00000669	ENSAPLG00000015623	ENSAPLT00000016278	ENSAPLT00000016278
XLOC_000383	TCONS_00000670	ENSAPLG00000000869	ENSAPLT00000000847	ENSAPLT00000000847
XLOC_000384	TCONS_00000671	XLOC_000384	TCONS_00000671
XLOC_000385	TCONS_00000672	XLOC_000385	TCONS_00000672
XLOC_000386	TCONS_00000673	XLOC_000386	TCONS_00000673
XLOC_000387	TCONS_00000674	XLOC_000387	TCONS_00000674
XLOC_000388	TCONS_00000675	XLOC_000388	TCONS_00000675
XLOC_000389	TCONS_00000678	DPY19L4	ENSAPLT00000006412	ENSAPLT00000006412
XLOC_000389	TCONS_00000677	DPY19L4	TCONS_00000677	ENSAPLT00000006412
XLOC_000389	TCONS_00000676	DPY19L4	TCONS_00000676	ENSAPLT00000006412
XLOC_000390	TCONS_00000681	ENSAPLG00000006639	ENSAPLT00000006900	ENSAPLT00000006900
XLOC_000390	TCONS_00000680	ENSAPLG00000006639	TCONS_00000680	ENSAPLT00000006900
XLOC_000390	TCONS_00000679	ENSAPLG00000006639	TCONS_00000679	ENSAPLT00000006900
XLOC_000390	TCONS_00000682	ENSAPLG00000006639	TCONS_00000682	ENSAPLT00000006900
XLOC_000391	TCONS_00000683	INTS8	ENSAPLT00000007357	ENSAPLT00000007357
XLOC_000392	TCONS_00000684	NDUFAF6	ENSAPLT00000008693	ENSAPLT00000008693
XLOC_000393	TCONS_00000685	PLEKHF2	ENSAPLT00000012091	ENSAPLT00000012091
XLOC_000394	TCONS_00000686	CCNE2	ENSAPLT00000007956	ENSAPLT00000007956
XLOC_000394	TCONS_00000687	CCNE2	TCONS_00000687	ENSAPLT00000007956
XLOC_000395	TCONS_00000689	TP53INP1	TCONS_00000689	ENSAPLT00000008621
XLOC_000395	TCONS_00000688	TP53INP1	TCONS_00000688	ENSAPLT00000008621
XLOC_000395	TCONS_00000690	TP53INP1	ENSAPLT00000008621	ENSAPLT00000008621
XLOC_000396	TCONS_00000691	XLOC_000396	TCONS_00000691
XLOC_000396	TCONS_00000692	XLOC_000396	TCONS_00000692
XLOC_000397	TCONS_00000695	BMP5	ENSAPLT00000015395	ENSAPLT00000015395
XLOC_000397	TCONS_00000694	BMP5	TCONS_00000694	ENSAPLT00000015395
XLOC_000397	TCONS_00000693	BMP5	TCONS_00000693	ENSAPLT00000015395
XLOC_000398	TCONS_00000696	HMGCLL1	TCONS_00000696	ENSAPLT00000015462
XLOC_000398	TCONS_00000697	HMGCLL1	TCONS_00000697	ENSAPLT00000015462
XLOC_000398	TCONS_00000698	HMGCLL1	ENSAPLT00000015462	ENSAPLT00000015462
XLOC_000399	TCONS_00000699	KLHL31	ENSAPLT00000003138	ENSAPLT00000003138
XLOC_000400	TCONS_00000700	GCLC	TCONS_00000700	ENSAPLT00000003193
XLOC_000400	TCONS_00000702	GCLC	ENSAPLT00000003193	ENSAPLT00000003193
XLOC_000400	TCONS_00000701	GCLC	TCONS_00000701	ENSAPLT00000003193
XLOC_000401	TCONS_00000703	ELOVL5	ENSAPLT00000003757	ENSAPLT00000003757
XLOC_000402	TCONS_00000704	GCM1	ENSAPLT00000004262	ENSAPLT00000004262
XLOC_000403	TCONS_00000705	ICK	TCONS_00000705	ENSAPLT00000004730
XLOC_000403	TCONS_00000706	ICK	ENSAPLT00000004730	ENSAPLT00000004730
XLOC_000404	TCONS_00000707	ENSAPLG00000004953	ENSAPLT00000005121	ENSAPLT00000005121
XLOC_000405	TCONS_00000708	ENSAPLG00000005277	ENSAPLT00000005463	ENSAPLT00000005463
XLOC_000406	TCONS_00000709	ENSAPLG00000005354	TCONS_00000709	ENSAPLT00000005539
XLOC_000406	TCONS_00000710	ENSAPLG00000005354	ENSAPLT00000005539	ENSAPLT00000005539
XLOC_000407	TCONS_00000711	ENSAPLG00000005503	ENSAPLT00000005683	ENSAPLT00000005683
XLOC_000408	TCONS_00000712	XLOC_000408	TCONS_00000712
XLOC_000409	TCONS_00000713	ANGPT2	ENSAPLT00000005903	ENSAPLT00000005903
XLOC_000410	TCONS_00000714	XLOC_000410	TCONS_00000714
XLOC_000411	TCONS_00000715	XLOC_000411	TCONS_00000715
XLOC_000412	TCONS_00000716	ENSAPLG00000015109	ENSAPLT00000015741	ENSAPLT00000015741
XLOC_000413	TCONS_00000719	GFRAL	ENSAPLT00000015754	ENSAPLT00000015754
XLOC_000413	TCONS_00000718	GFRAL	ENSAPLT00000015753	ENSAPLT00000015753
XLOC_000413	TCONS_00000717	GFRAL	TCONS_00000717	ENSAPLT00000015753
XLOC_000414	TCONS_00000720	HCRTR2	TCONS_00000720	ENSAPLT00000015863
XLOC_000414	TCONS_00000722	HCRTR2	ENSAPLT00000015863	ENSAPLT00000015863
XLOC_000414	TCONS_00000721	HCRTR2	TCONS_00000721	ENSAPLT00000015863
XLOC_000415	TCONS_00000723	FAM83B	ENSAPLT00000016126	ENSAPLT00000016126
XLOC_000416	TCONS_00000724	XLOC_000416	TCONS_00000724
XLOC_000417	TCONS_00000725	XLOC_000417	TCONS_00000725
XLOC_000418	TCONS_00000726	TINAG	ENSAPLT00000016197	ENSAPLT00000016197
XLOC_000419	TCONS_00000727	MLIP	ENSAPLT00000002390	ENSAPLT00000002390
XLOC_000419	TCONS_00000728	MLIP	TCONS_00000728	ENSAPLT00000002390
XLOC_000420	TCONS_00000729	LRRC1	TCONS_00000729	ENSAPLT00000002631
XLOC_000420	TCONS_00000730	LRRC1	TCONS_00000730	ENSAPLT00000002631
XLOC_000420	TCONS_00000732	LRRC1	ENSAPLT00000002631	ENSAPLT00000002631
XLOC_000420	TCONS_00000731	LRRC1	TCONS_00000731	ENSAPLT00000002631
XLOC_000421	TCONS_00000734	ENSAPLG00000002982	ENSAPLT00000003022	ENSAPLT00000003022
XLOC_000421	TCONS_00000733	ENSAPLG00000002982	TCONS_00000733	ENSAPLT00000003022
XLOC_000422	TCONS_00000736	XLOC_000422	TCONS_00000736
XLOC_000422	TCONS_00000735	XLOC_000422	TCONS_00000735
XLOC_000422	TCONS_00000737	XLOC_000422	TCONS_00000737
XLOC_000423	TCONS_00000738	FBXO9	ENSAPLT00000004315	ENSAPLT00000004315
XLOC_000423	TCONS_00000741	FBXO9	TCONS_00000741	ENSAPLT00000004315
XLOC_000423	TCONS_00000740	FBXO9	TCONS_00000740	ENSAPLT00000004315
XLOC_000423	TCONS_00000739	FBXO9	TCONS_00000739	ENSAPLT00000004315
XLOC_000424	TCONS_00000742	7SK	ENSAPLT00000000343	ENSAPLT00000000343
XLOC_000425	TCONS_00000743	TMEM14A	ENSAPLT00000005698	ENSAPLT00000005698
XLOC_000426	TCONS_00000745	AGPAT5	ENSAPLT00000005746	ENSAPLT00000005746
XLOC_000426	TCONS_00000744	AGPAT5	TCONS_00000744	ENSAPLT00000005746
XLOC_000427	TCONS_00000746	XLOC_000427	TCONS_00000746
XLOC_000428	TCONS_00000749	MCPH1	ENSAPLT00000006342	ENSAPLT00000006342
XLOC_000428	TCONS_00000748	MCPH1	TCONS_00000748	ENSAPLT00000006342
XLOC_000428	TCONS_00000747	MCPH1	TCONS_00000747	ENSAPLT00000006342
XLOC_000429	TCONS_00000750	XLOC_000429	TCONS_00000750
XLOC_000430	TCONS_00000751	XLOC_000430	TCONS_00000751
XLOC_000431	TCONS_00000754	BIRC7	TCONS_00000754	ENSAPLT00000006327
XLOC_000431	TCONS_00000753	BIRC7	TCONS_00000753	ENSAPLT00000006327
XLOC_000431	TCONS_00000752	BIRC7	TCONS_00000752	ENSAPLT00000006327
XLOC_000431	TCONS_00000755	BIRC7	ENSAPLT00000006327	ENSAPLT00000006327
XLOC_000432	TCONS_00000756	ARFGAP1	TCONS_00000756	ENSAPLT00000006674
XLOC_000432	TCONS_00000757	ARFGAP1	TCONS_00000757	ENSAPLT00000006674
XLOC_000432	TCONS_00000758	ARFGAP1	ENSAPLT00000006674	ENSAPLT00000006674
XLOC_000433	TCONS_00000760	XLOC_000433	TCONS_00000760
XLOC_000433	TCONS_00000759	XLOC_000433	TCONS_00000759
XLOC_000434	TCONS_00000761	ENSAPLG00000006994	ENSAPLT00000007265	ENSAPLT00000007265
XLOC_000435	TCONS_00000762	COL20A1	TCONS_00000762	ENSAPLT00000007496
XLOC_000435	TCONS_00000764	COL20A1	ENSAPLT00000007496	ENSAPLT00000007496
XLOC_000435	TCONS_00000763	COL20A1	TCONS_00000763	ENSAPLT00000007496
XLOC_000435	TCONS_00000765	COL20A1	TCONS_00000765	ENSAPLT00000007496
XLOC_000436	TCONS_00000766	YTHDF1	ENSAPLT00000006221	ENSAPLT00000006221
XLOC_000437	TCONS_00000768	NKAIN4	ENSAPLT00000006384	ENSAPLT00000006384
XLOC_000437	TCONS_00000767	NKAIN4	TCONS_00000767	ENSAPLT00000006384
XLOC_000438	TCONS_00000769	XLOC_000438	TCONS_00000769
XLOC_000439	TCONS_00000770	CHRNA4	TCONS_00000770	ENSAPLT00000008077
XLOC_000439	TCONS_00000771	CHRNA4	ENSAPLT00000008077	ENSAPLT00000008077
XLOC_000439	TCONS_00000772	CHRNA4	TCONS_00000772	ENSAPLT00000008077
XLOC_000440	TCONS_00000773	KCNQ2	ENSAPLT00000008610	ENSAPLT00000008610
XLOC_000441	TCONS_00000774	ENSAPLG00000015818	ENSAPLT00000016489	ENSAPLT00000016489
XLOC_000442	TCONS_00000775	DPH2	TCONS_00000775	ENSAPLT00000001272
XLOC_000443	TCONS_00000777	DPH2	ENSAPLT00000001272	ENSAPLT00000001272
XLOC_000443	TCONS_00000776	DPH2	TCONS_00000776	ENSAPLT00000001272
XLOC_000443	TCONS_00000778	DPH2	TCONS_00000778	ENSAPLT00000001272
XLOC_000444	TCONS_00000779	B4GALT2	ENSAPLT00000016500	ENSAPLT00000016500
XLOC_000444	TCONS_00000780	B4GALT2	TCONS_00000780	ENSAPLT00000016500
XLOC_000445	TCONS_00000781	ATP6V0B	ENSAPLT00000016574	ENSAPLT00000016574
XLOC_000446	TCONS_00000782	IPO13	ENSAPLT00000002065	ENSAPLT00000002065
XLOC_000447	TCONS_00000783	ARTN	ENSAPLT00000003235	ENSAPLT00000003235
XLOC_000447	TCONS_00000784	ARTN	ENSAPLT00000003240	ENSAPLT00000003240
XLOC_000447	TCONS_00000785	ARTN	TCONS_00000785	ENSAPLT00000003240
XLOC_000448	TCONS_00000786	ST3GAL3	ENSAPLT00000003384	ENSAPLT00000003384
XLOC_000448	TCONS_00000787	ST3GAL3	TCONS_00000787	ENSAPLT00000003384
XLOC_000449	TCONS_00000788	KDM4A	TCONS_00000788	ENSAPLT00000003570
XLOC_000449	TCONS_00000791	KDM4A	ENSAPLT00000003570	ENSAPLT00000003570
XLOC_000449	TCONS_00000790	KDM4A	TCONS_00000790	ENSAPLT00000003570
XLOC_000449	TCONS_00000789	KDM4A	TCONS_00000789	ENSAPLT00000003570
XLOC_000450	TCONS_00000792	PTPRF	TCONS_00000792	ENSAPLT00000004338
XLOC_000450	TCONS_00000793	PTPRF	ENSAPLT00000004338	ENSAPLT00000004338
XLOC_000450	TCONS_00000794	PTPRF	TCONS_00000794	ENSAPLT00000004338
XLOC_000451	TCONS_00000795	XLOC_000451	TCONS_00000795
XLOC_000452	TCONS_00000796	PTPRD	TCONS_00000796	ENSAPLT00000012786
XLOC_000452	TCONS_00000797	PTPRD	ENSAPLT00000012786	ENSAPLT00000012786
XLOC_000452	TCONS_00000801	PTPRD	TCONS_00000801	ENSAPLT00000012786
XLOC_000452	TCONS_00000800	PTPRD	TCONS_00000800	ENSAPLT00000012786
XLOC_000452	TCONS_00000799	PTPRD	TCONS_00000799	ENSAPLT00000012786
XLOC_000452	TCONS_00000798	PTPRD	TCONS_00000798	ENSAPLT00000012786
XLOC_000453	TCONS_00000802	AP3S2	ENSAPLT00000005639	ENSAPLT00000005639
XLOC_000454	TCONS_00000803	ANPEP	ENSAPLT00000005807	ENSAPLT00000005807
XLOC_000454	TCONS_00000804	ANPEP	TCONS_00000804	ENSAPLT00000005807
XLOC_000455	TCONS_00000805	ENSAPLG00000006201	ENSAPLT00000006418	ENSAPLT00000006418
XLOC_000456	TCONS_00000808	RASGRF1	ENSAPLT00000006489	ENSAPLT00000006489
XLOC_000456	TCONS_00000807	RASGRF1	TCONS_00000807	ENSAPLT00000006489
XLOC_000456	TCONS_00000806	RASGRF1	TCONS_00000806	ENSAPLT00000006489
XLOC_000457	TCONS_00000809	XLOC_000457	TCONS_00000809
XLOC_000458	TCONS_00000810	CTSH	ENSAPLT00000006982	ENSAPLT00000006982
XLOC_000459	TCONS_00000811	BLM	TCONS_00000811	ENSAPLT00000007160
XLOC_000459	TCONS_00000812	BLM	ENSAPLT00000007160	ENSAPLT00000007160
XLOC_000460	TCONS_00000813	WDR76	ENSAPLT00000007380	ENSAPLT00000007380
XLOC_000461	TCONS_00000814	XLOC_000461	TCONS_00000814
XLOC_000462	TCONS_00000815	CASC4	TCONS_00000815	ENSAPLT00000008101
XLOC_000462	TCONS_00000817	CASC4	ENSAPLT00000008101	ENSAPLT00000008101
XLOC_000462	TCONS_00000816	CASC4	TCONS_00000816	ENSAPLT00000008101
XLOC_000463	TCONS_00000818	XLOC_000463	TCONS_00000818
XLOC_000464	TCONS_00000819	CTDSPL2	TCONS_00000819	ENSAPLT00000008308
XLOC_000464	TCONS_00000820	CTDSPL2	ENSAPLT00000008308	ENSAPLT00000008308
XLOC_000465	TCONS_00000822	EIF3J	ENSAPLT00000008815	ENSAPLT00000008815
XLOC_000465	TCONS_00000821	EIF3J	TCONS_00000821	ENSAPLT00000008815
XLOC_000465	TCONS_00000823	EIF3J	ENSAPLT00000008819	ENSAPLT00000008819
XLOC_000466	TCONS_00000824	FAM96A	ENSAPLT00000009578	ENSAPLT00000009578
XLOC_000467	TCONS_00000825	ENSAPLG00000001405	ENSAPLT00000001393	ENSAPLT00000001393
XLOC_000468	TCONS_00000826	SPDEF	ENSAPLT00000005608	ENSAPLT00000005608
XLOC_000469	TCONS_00000827	ANKRD34C	ENSAPLT00000005713	ENSAPLT00000005713
XLOC_000469	TCONS_00000829	ANKRD34C	ENSAPLT00000005717	ENSAPLT00000005717
XLOC_000470	TCONS_00000828	TMED3	ENSAPLT00000006420	ENSAPLT00000006420
XLOC_000471	TCONS_00000830	ENSAPLG00000000078	ENSAPLT00000000078	ENSAPLT00000000078
XLOC_000472	TCONS_00000832	FRMD5	TCONS_00000832	ENSAPLT00000007619
XLOC_000472	TCONS_00000831	FRMD5	TCONS_00000831	ENSAPLT00000007619
XLOC_000472	TCONS_00000833	FRMD5	ENSAPLT00000007619	ENSAPLT00000007619
XLOC_000473	TCONS_00000834	XLOC_000473	TCONS_00000834
XLOC_000473	TCONS_00000835	XLOC_000473	TCONS_00000835
XLOC_000473	TCONS_00000836	XLOC_000473	TCONS_00000836
XLOC_000474	TCONS_00000838	SPG11	TCONS_00000838	ENSAPLT00000009035
XLOC_000474	TCONS_00000837	SPG11	TCONS_00000837	ENSAPLT00000009035
XLOC_000474	TCONS_00000839	SPG11	ENSAPLT00000009035	ENSAPLT00000009035
XLOC_000475	TCONS_00000840	ADAMTS7	ENSAPLT00000009766	ENSAPLT00000009766
XLOC_000476	TCONS_00000841	XLOC_000476	TCONS_00000841
XLOC_000477	TCONS_00000842	DSCAM	TCONS_00000842	ENSAPLT00000014523
XLOC_000477	TCONS_00000846	DSCAM	TCONS_00000846	ENSAPLT00000014523
XLOC_000477	TCONS_00000848	DSCAM	ENSAPLT00000014523	ENSAPLT00000014523
XLOC_000477	TCONS_00000847	DSCAM	TCONS_00000847	ENSAPLT00000014523
XLOC_000477	TCONS_00000845	DSCAM	TCONS_00000845	ENSAPLT00000014523
XLOC_000477	TCONS_00000844	DSCAM	TCONS_00000844	ENSAPLT00000014523
XLOC_000477	TCONS_00000843	DSCAM	TCONS_00000843	ENSAPLT00000014523
XLOC_000478	TCONS_00000849	LCA5L	ENSAPLT00000015052	ENSAPLT00000015052
XLOC_000479	TCONS_00000850	ENSAPLG00000014566	ENSAPLT00000015172	ENSAPLT00000015172
XLOC_000480	TCONS_00000853	BRWD1	TCONS_00000853	ENSAPLT00000015277
XLOC_000480	TCONS_00000852	BRWD1	TCONS_00000852	ENSAPLT00000015277
XLOC_000480	TCONS_00000851	BRWD1	TCONS_00000851	ENSAPLT00000015277
XLOC_000480	TCONS_00000854	BRWD1	ENSAPLT00000015277	ENSAPLT00000015277
XLOC_000481	TCONS_00000855	PSMG1	ENSAPLT00000015587	ENSAPLT00000015587
XLOC_000482	TCONS_00000856	XLOC_000482	TCONS_00000856
XLOC_000483	TCONS_00000858	XLOC_000483	TCONS_00000858
XLOC_000483	TCONS_00000857	XLOC_000483	TCONS_00000857
XLOC_000484	TCONS_00000859	XLOC_000484	TCONS_00000859
XLOC_000485	TCONS_00000861	ERG	ENSAPLT00000015948	ENSAPLT00000015948
XLOC_000485	TCONS_00000860	ERG	TCONS_00000860	ENSAPLT00000015948
XLOC_000486	TCONS_00000862	KCNJ6	ENSAPLT00000016159	ENSAPLT00000016159
XLOC_000487	TCONS_00000864	BACE2	ENSAPLT00000014210	ENSAPLT00000014210
XLOC_000487	TCONS_00000863	BACE2	TCONS_00000863	ENSAPLT00000014210
XLOC_000488	TCONS_00000865	PCP4	ENSAPLT00000012217	ENSAPLT00000012217
XLOC_000489	TCONS_00000866	IGSF5	TCONS_00000866	ENSAPLT00000015025
XLOC_000489	TCONS_00000867	IGSF5	ENSAPLT00000015013	ENSAPLT00000015013
XLOC_000489	TCONS_00000868	IGSF5	ENSAPLT00000015025	ENSAPLT00000015025
XLOC_000490	TCONS_00000869	B3GALT5	ENSAPLT00000012221	ENSAPLT00000012221
XLOC_000491	TCONS_00000871	SH3BGR	ENSAPLT00000015044	ENSAPLT00000015044
XLOC_000491	TCONS_00000870	SH3BGR	TCONS_00000870	ENSAPLT00000015044
XLOC_000491	TCONS_00000872	SH3BGR	ENSAPLT00000015045	ENSAPLT00000015045
XLOC_000492	TCONS_00000873	WRB	ENSAPLT00000015119	ENSAPLT00000015119
XLOC_000493	TCONS_00000874	ETS2	TCONS_00000874	ENSAPLT00000015737
XLOC_000493	TCONS_00000875	ETS2	ENSAPLT00000015737	ENSAPLT00000015737
XLOC_000493	TCONS_00000876	ETS2	TCONS_00000876	ENSAPLT00000015737
XLOC_000494	TCONS_00000877	KCNJ15	ENSAPLT00000012231	ENSAPLT00000012231
XLOC_000494	TCONS_00000878	KCNJ15	TCONS_00000878	ENSAPLT00000012231
XLOC_000494	TCONS_00000879	KCNJ15	TCONS_00000879	ENSAPLT00000012231
XLOC_000495	TCONS_00000880	XLOC_000495	TCONS_00000880
XLOC_000496	TCONS_00000881	XLOC_000496	TCONS_00000881
XLOC_000497	TCONS_00000882	XLOC_000497	TCONS_00000882
XLOC_000498	TCONS_00000883	XLOC_000498	TCONS_00000883
XLOC_000499	TCONS_00000884	XLOC_000499	TCONS_00000884
XLOC_000500	TCONS_00000885	XLOC_000500	TCONS_00000885
XLOC_000501	TCONS_00000886	XLOC_000501	TCONS_00000886
XLOC_000502	TCONS_00000887	XLOC_000502	TCONS_00000887
XLOC_000503	TCONS_00000888	XLOC_000503	TCONS_00000888
XLOC_000504	TCONS_00000889	XLOC_000504	TCONS_00000889
XLOC_000505	TCONS_00000890	XLOC_000505	TCONS_00000890
XLOC_000506	TCONS_00000891	CSMD3	ENSAPLT00000016226	ENSAPLT00000016226
XLOC_000507	TCONS_00000892	ENSAPLG00000016217	ENSAPLT00000016914	ENSAPLT00000016914
XLOC_000508	TCONS_00000893	XLOC_000508	TCONS_00000893
XLOC_000509	TCONS_00000894	GNL1	TCONS_00000894	ENSAPLT00000012927
XLOC_000509	TCONS_00000895	GNL1	ENSAPLT00000012927	ENSAPLT00000012927
XLOC_000510	TCONS_00000898	SLU7	ENSAPLT00000008508	ENSAPLT00000008508
XLOC_000510	TCONS_00000897	SLU7	TCONS_00000897	ENSAPLT00000008508
XLOC_000510	TCONS_00000896	SLU7	TCONS_00000896	ENSAPLT00000008508
XLOC_000511	TCONS_00000899	C1QTNF2	TCONS_00000899	ENSAPLT00000008932
XLOC_000511	TCONS_00000900	C1QTNF2	ENSAPLT00000008932	ENSAPLT00000008932
XLOC_000512	TCONS_00000901	XLOC_000512	TCONS_00000901
XLOC_000513	TCONS_00000903	CCNJL	ENSAPLT00000008933	ENSAPLT00000008933
XLOC_000513	TCONS_00000902	CCNJL	TCONS_00000902	ENSAPLT00000008933
XLOC_000514	TCONS_00000904	XLOC_000514	TCONS_00000904
XLOC_000515	TCONS_00000905	XLOC_000515	TCONS_00000905
XLOC_000516	TCONS_00000906	PWWP2A	ENSAPLT00000009117	ENSAPLT00000009117
XLOC_000516	TCONS_00000907	PWWP2A	TCONS_00000907	ENSAPLT00000009117
XLOC_000517	TCONS_00000908	XLOC_000517	TCONS_00000908
XLOC_000518	TCONS_00000909	XLOC_000518	TCONS_00000909
XLOC_000519	TCONS_00000910	XLOC_000519	TCONS_00000910
XLOC_000520	TCONS_00000911	XLOC_000520	TCONS_00000911
XLOC_000521	TCONS_00000912	IL12B	TCONS_00000912	ENSAPLT00000009477
XLOC_000521	TCONS_00000913	IL12B	TCONS_00000913	ENSAPLT00000009477
XLOC_000521	TCONS_00000914	IL12B	ENSAPLT00000009477	ENSAPLT00000009477
XLOC_000522	TCONS_00000915	FBXO38	TCONS_00000915	ENSAPLT00000009723
XLOC_000522	TCONS_00000916	FBXO38	ENSAPLT00000009723	ENSAPLT00000009723
XLOC_000523	TCONS_00000917	XLOC_000523	TCONS_00000917
XLOC_000524	TCONS_00000918	ENSAPLG00000010571	ENSAPLT00000011075	ENSAPLT00000011075
XLOC_000524	TCONS_00000920	ENSAPLG00000010571	TCONS_00000920	ENSAPLT00000011075
XLOC_000524	TCONS_00000919	ENSAPLG00000010571	TCONS_00000919	ENSAPLT00000011075
XLOC_000525	TCONS_00000921	IL17B	ENSAPLT00000012266	ENSAPLT00000012266
XLOC_000526	TCONS_00000922	ENSAPLG00000007970	ENSAPLT00000008273	ENSAPLT00000008273
XLOC_000526	TCONS_00000923	ENSAPLG00000007970	TCONS_00000923	ENSAPLT00000008273
XLOC_000526	TCONS_00000924	ENSAPLG00000007970	TCONS_00000924	ENSAPLT00000008273
XLOC_000527	TCONS_00000925	FABP6	TCONS_00000925	ENSAPLT00000008955
XLOC_000528	TCONS_00000926	FABP6	ENSAPLT00000008955	ENSAPLT00000008955
XLOC_000528	TCONS_00000927	FABP6	TCONS_00000927	ENSAPLT00000008955
XLOC_000529	TCONS_00000928	XLOC_000529	TCONS_00000928
XLOC_000529	TCONS_00000929	XLOC_000529	TCONS_00000929
XLOC_000529	TCONS_00000930	XLOC_000529	TCONS_00000930
XLOC_000530	TCONS_00000931	TTC1	ENSAPLT00000009153	ENSAPLT00000009153
XLOC_000531	TCONS_00000932	XLOC_000531	TCONS_00000932
XLOC_000532	TCONS_00000933	ADRA1B	ENSAPLT00000009447	ENSAPLT00000009447
XLOC_000533	TCONS_00000934	XLOC_000533	TCONS_00000934
XLOC_000534	TCONS_00000935	XLOC_000534	TCONS_00000935
XLOC_000535	TCONS_00000936	XLOC_000535	TCONS_00000936
XLOC_000536	TCONS_00000937	XLOC_000536	TCONS_00000937
XLOC_000537	TCONS_00000938	XLOC_000537	TCONS_00000938
XLOC_000538	TCONS_00000939	ENSAPLG00000000547	ENSAPLT00000000547	ENSAPLT00000000547
XLOC_000539	TCONS_00000940	HTR4	TCONS_00000940	ENSAPLT00000009905
XLOC_000539	TCONS_00000941	HTR4	TCONS_00000941	ENSAPLT00000009905
XLOC_000539	TCONS_00000942	HTR4	ENSAPLT00000009905	ENSAPLT00000009905
XLOC_000540	TCONS_00000943	XLOC_000540	TCONS_00000943
XLOC_000541	TCONS_00000944	ENSAPLG00000009769	ENSAPLT00000010163	ENSAPLT00000010163
XLOC_000542	TCONS_00000945	SLC26A2	ENSAPLT00000010286	ENSAPLT00000010286
XLOC_000543	TCONS_00000946	ENSAPLG00000009890	ENSAPLT00000010289	ENSAPLT00000010289
XLOC_000543	TCONS_00000948	ENSAPLG00000009890	TCONS_00000948	ENSAPLT00000010289
XLOC_000543	TCONS_00000947	ENSAPLG00000009890	TCONS_00000947	ENSAPLT00000010289
XLOC_000544	TCONS_00000949	PPARGC1B	TCONS_00000949	ENSAPLT00000010401
XLOC_000544	TCONS_00000950	PPARGC1B	ENSAPLT00000010401	ENSAPLT00000010401
XLOC_000545	TCONS_00000951	XLOC_000545	TCONS_00000951
XLOC_000546	TCONS_00000952	ARHGEF37	ENSAPLT00000010863	ENSAPLT00000010863
XLOC_000546	TCONS_00000954	ARHGEF37	TCONS_00000954	ENSAPLT00000010863
XLOC_000546	TCONS_00000953	ARHGEF37	TCONS_00000953	ENSAPLT00000010863
XLOC_000547	TCONS_00000955	ENSAPLG00000000514	ENSAPLT00000000514	ENSAPLT00000000514
XLOC_000548	TCONS_00000956	ENSAPLG00000000359	ENSAPLT00000000359	ENSAPLT00000000359
XLOC_000549	TCONS_00000957	XLOC_000549	TCONS_00000957
XLOC_000550	TCONS_00000958	PCYOX1L	ENSAPLT00000012271	ENSAPLT00000012271
XLOC_000551	TCONS_00000959	GRPEL2	ENSAPLT00000012422	ENSAPLT00000012422
XLOC_000552	TCONS_00000960	AFAP1L1	TCONS_00000960	ENSAPLT00000012526
XLOC_000552	TCONS_00000961	AFAP1L1	ENSAPLT00000012526	ENSAPLT00000012526
XLOC_000553	TCONS_00000964	ABLIM3	ENSAPLT00000013019	ENSAPLT00000013019
XLOC_000553	TCONS_00000963	ABLIM3	TCONS_00000963	ENSAPLT00000013019
XLOC_000553	TCONS_00000962	ABLIM3	TCONS_00000962	ENSAPLT00000013019
XLOC_000553	TCONS_00000965	ABLIM3	TCONS_00000965	ENSAPLT00000013019
XLOC_000553	TCONS_00000966	ABLIM3	TCONS_00000966	ENSAPLT00000013019
XLOC_000554	TCONS_00000967	ENSAPLG00000000802	ENSAPLT00000000777	ENSAPLT00000000777
XLOC_000555	TCONS_00000968	ENSAPLG00000009502	ENSAPLT00000009894	ENSAPLT00000009894
XLOC_000556	TCONS_00000969	HS3ST5	ENSAPLT00000007159	ENSAPLT00000007159
XLOC_000557	TCONS_00000972	HDAC2	ENSAPLT00000007252	ENSAPLT00000007252
XLOC_000557	TCONS_00000971	HDAC2	TCONS_00000971	ENSAPLT00000007252
XLOC_000557	TCONS_00000970	HDAC2	TCONS_00000970	ENSAPLT00000007252
XLOC_000558	TCONS_00000973	XLOC_000558	TCONS_00000973
XLOC_000559	TCONS_00000974	XLOC_000559	TCONS_00000974
XLOC_000560	TCONS_00000975	ENSAPLG00000001738	ENSAPLT00000001732	ENSAPLT00000001732
XLOC_000561	TCONS_00000976	ENSAPLG00000001739	ENSAPLT00000001733	ENSAPLT00000001733
XLOC_000561	TCONS_00000977	ENSAPLG00000001739	TCONS_00000977	ENSAPLT00000001733
XLOC_000562	TCONS_00000978	XLOC_000562	TCONS_00000978
XLOC_000563	TCONS_00000979	XLOC_000563	TCONS_00000979
XLOC_000564	TCONS_00000981	XLOC_000564	TCONS_00000981
XLOC_000564	TCONS_00000980	XLOC_000564	TCONS_00000980
XLOC_000565	TCONS_00000983	XLOC_000565	TCONS_00000983
XLOC_000565	TCONS_00000982	XLOC_000565	TCONS_00000982
XLOC_000565	TCONS_00000984	XLOC_000565	TCONS_00000984
XLOC_000566	TCONS_00000985	ZBTB14	TCONS_00000985	ENSAPLT00000012013
XLOC_000566	TCONS_00000986	ZBTB14	TCONS_00000986	ENSAPLT00000012013
XLOC_000566	TCONS_00000987	ZBTB14	ENSAPLT00000012013	ENSAPLT00000012013
XLOC_000567	TCONS_00000988	XLOC_000567	TCONS_00000988
XLOC_000568	TCONS_00000989	DLGAP1	ENSAPLT00000010657	ENSAPLT00000010657
XLOC_000568	TCONS_00000990	DLGAP1	TCONS_00000990	ENSAPLT00000010657
XLOC_000568	TCONS_00000991	DLGAP1	TCONS_00000991	ENSAPLT00000010657
XLOC_000569	TCONS_00000992	XLOC_000569	TCONS_00000992
XLOC_000570	TCONS_00000993	XLOC_000570	TCONS_00000993
XLOC_000571	TCONS_00000994	XLOC_000571	TCONS_00000994
XLOC_000572	TCONS_00000995	MYOM1	ENSAPLT00000011290	ENSAPLT00000011290
XLOC_000572	TCONS_00000996	MYOM1	TCONS_00000996	ENSAPLT00000011290
XLOC_000572	TCONS_00000997	MYOM1	TCONS_00000997	ENSAPLT00000011290
XLOC_000573	TCONS_00000998	LPIN2	TCONS_00000998	ENSAPLT00000013150
XLOC_000573	TCONS_00000999	LPIN2	ENSAPLT00000013150	ENSAPLT00000013150
XLOC_000574	TCONS_00001002	METTL4	TCONS_00001002	ENSAPLT00000015678
XLOC_000574	TCONS_00001001	METTL4	TCONS_00001001	ENSAPLT00000015678
XLOC_000574	TCONS_00001000	METTL4	TCONS_00001000	ENSAPLT00000015678
XLOC_000574	TCONS_00001003	METTL4	ENSAPLT00000015678	ENSAPLT00000015678
XLOC_000575	TCONS_00001004	XLOC_000575	TCONS_00001004
XLOC_000576	TCONS_00001005	XLOC_000576	TCONS_00001005
XLOC_000576	TCONS_00001007	XLOC_000576	TCONS_00001007
XLOC_000576	TCONS_00001006	XLOC_000576	TCONS_00001006
XLOC_000577	TCONS_00001008	XLOC_000577	TCONS_00001008
XLOC_000578	TCONS_00001011	YES1	TCONS_00001011	ENSAPLT00000015864
XLOC_000578	TCONS_00001012	YES1	ENSAPLT00000015864	ENSAPLT00000015864
XLOC_000578	TCONS_00001010	YES1	TCONS_00001010	ENSAPLT00000015864
XLOC_000578	TCONS_00001009	YES1	TCONS_00001009	ENSAPLT00000015864
XLOC_000579	TCONS_00001013	COLEC12	ENSAPLT00000016693	ENSAPLT00000016693
XLOC_000580	TCONS_00001014	THOC1	TCONS_00001014	ENSAPLT00000016883
XLOC_000580	TCONS_00001015	THOC1	ENSAPLT00000016883	ENSAPLT00000016883
XLOC_000581	TCONS_00001016	ROCK1	TCONS_00001016	ENSAPLT00000002836
XLOC_000582	TCONS_00001017	XLOC_000582	TCONS_00001017
XLOC_000583	TCONS_00001018	XLOC_000583	TCONS_00001018
XLOC_000583	TCONS_00001019	XLOC_000583	TCONS_00001019
XLOC_000583	TCONS_00001020	XLOC_000583	TCONS_00001020
XLOC_000584	TCONS_00001021	ENSAPLG00000004077	TCONS_00001021	ENSAPLT00000004229
XLOC_000584	TCONS_00001022	ENSAPLG00000004077	ENSAPLT00000004229	ENSAPLT00000004229
XLOC_000584	TCONS_00001023	ENSAPLG00000004077	TCONS_00001023	ENSAPLT00000004229
XLOC_000584	TCONS_00001024	ENSAPLG00000004754	ENSAPLT00000004891	ENSAPLT00000004891
XLOC_000585	TCONS_00001025	XLOC_000585	TCONS_00001025
XLOC_000586	TCONS_00001028	MIB1	ENSAPLT00000005397	ENSAPLT00000005397
XLOC_000586	TCONS_00001027	MIB1	TCONS_00001027	ENSAPLT00000005397
XLOC_000586	TCONS_00001026	MIB1	TCONS_00001026	ENSAPLT00000005397
XLOC_000587	TCONS_00001029	XLOC_000587	TCONS_00001029
XLOC_000588	TCONS_00001030	GATA6	ENSAPLT00000006065	ENSAPLT00000006065
XLOC_000589	TCONS_00001031	RBBP8	TCONS_00001031	ENSAPLT00000006124
XLOC_000589	TCONS_00001032	RBBP8	TCONS_00001032	ENSAPLT00000006124
XLOC_000589	TCONS_00001034	RBBP8	ENSAPLT00000006124	ENSAPLT00000006124
XLOC_000589	TCONS_00001033	RBBP8	TCONS_00001033	ENSAPLT00000006124
XLOC_000590	TCONS_00001035	CABLES1	ENSAPLT00000006574	ENSAPLT00000006574
XLOC_000591	TCONS_00001036	ENSAPLG00000000158	ENSAPLT00000000158	ENSAPLT00000000158
XLOC_000592	TCONS_00001037	RIOK3	TCONS_00001037	ENSAPLT00000006773
XLOC_000592	TCONS_00001038	RIOK3	ENSAPLT00000006773	ENSAPLT00000006773
XLOC_000593	TCONS_00001039	C18orf8	TCONS_00001039	ENSAPLT00000007274
XLOC_000593	TCONS_00001040	C18orf8	ENSAPLT00000007274	ENSAPLT00000007274
XLOC_000594	TCONS_00001043	LAMA3	TCONS_00001043	ENSAPLT00000008948
XLOC_000594	TCONS_00001044	LAMA3	ENSAPLT00000008948	ENSAPLT00000008948
XLOC_000594	TCONS_00001042	LAMA3	TCONS_00001042	ENSAPLT00000008948
XLOC_000594	TCONS_00001041	LAMA3	TCONS_00001041	ENSAPLT00000008948
XLOC_000595	TCONS_00001047	TTC39C	TCONS_00001047	ENSAPLT00000010880
XLOC_000595	TCONS_00001049	TTC39C	ENSAPLT00000010880	ENSAPLT00000010880
XLOC_000595	TCONS_00001048	TTC39C	TCONS_00001048	ENSAPLT00000010880
XLOC_000595	TCONS_00001046	TTC39C	TCONS_00001046	ENSAPLT00000010880
XLOC_000595	TCONS_00001045	TTC39C	TCONS_00001045	ENSAPLT00000010880
XLOC_000596	TCONS_00001050	XLOC_000596	TCONS_00001050
XLOC_000597	TCONS_00001051	TGIF1	ENSAPLT00000010972	ENSAPLT00000010972
XLOC_000597	TCONS_00001052	TGIF1	TCONS_00001052	ENSAPLT00000010972
XLOC_000597	TCONS_00001053	TGIF1	TCONS_00001053	ENSAPLT00000010972
XLOC_000598	TCONS_00001054	DLGAP1	TCONS_00001054	ENSAPLT00000010657
XLOC_000599	TCONS_00001056	ENSAPLG00000010564	TCONS_00001056	ENSAPLT00000010993
XLOC_000599	TCONS_00001055	ENSAPLG00000010564	TCONS_00001055	ENSAPLT00000010993
XLOC_000599	TCONS_00001057	ENSAPLG00000010564	ENSAPLT00000010993	ENSAPLT00000010993
XLOC_000600	TCONS_00001058	U5	ENSAPLT00000000310	ENSAPLT00000000310
XLOC_000601	TCONS_00001059	XLOC_000601	TCONS_00001059
XLOC_000602	TCONS_00001060	EMILIN2	TCONS_00001060	ENSAPLT00000013753
XLOC_000602	TCONS_00001061	EMILIN2	ENSAPLT00000013753	ENSAPLT00000013753
XLOC_000603	TCONS_00001062	ENSAPLG00000013237	ENSAPLT00000013890	ENSAPLT00000013890
XLOC_000603	TCONS_00001064	ENSAPLG00000013237	TCONS_00001064	ENSAPLT00000013890
XLOC_000603	TCONS_00001063	ENSAPLG00000013237	TCONS_00001063	ENSAPLT00000013890
XLOC_000603	TCONS_00001065	ENSAPLG00000014496	ENSAPLT00000015101	ENSAPLT00000015101
XLOC_000604	TCONS_00001066	NDC80	ENSAPLT00000015170	ENSAPLT00000015170
XLOC_000604	TCONS_00001067	NDC80	TCONS_00001067	ENSAPLT00000015170
XLOC_000605	TCONS_00001068	XLOC_000605	TCONS_00001068
XLOC_000606	TCONS_00001069	XLOC_000606	TCONS_00001069
XLOC_000607	TCONS_00001070	XLOC_000607	TCONS_00001070
XLOC_000608	TCONS_00001071	ADCYAP1	ENSAPLT00000012022	ENSAPLT00000012022
XLOC_000609	TCONS_00001072	ENSAPLG00000011558	ENSAPLT00000012024	ENSAPLT00000012024
XLOC_000610	TCONS_00001073	TYMS	ENSAPLT00000016346	ENSAPLT00000016346
XLOC_000610	TCONS_00001074	TYMS	TCONS_00001074	ENSAPLT00000016346
XLOC_000611	TCONS_00001075	CLUL1	ENSAPLT00000016637	ENSAPLT00000016637
XLOC_000612	TCONS_00001076	XLOC_000612	TCONS_00001076
XLOC_000613	TCONS_00001078	USP14	ENSAPLT00000001141	ENSAPLT00000001141
XLOC_000613	TCONS_00001077	USP14	TCONS_00001077	ENSAPLT00000001141
XLOC_000614	TCONS_00001079	ROCK1	TCONS_00001079	ENSAPLT00000002836
XLOC_000614	TCONS_00001080	ROCK1	ENSAPLT00000002836	ENSAPLT00000002836
XLOC_000615	TCONS_00001081	XLOC_000615	TCONS_00001081
XLOC_000616	TCONS_00001082	XLOC_000616	TCONS_00001082
XLOC_000617	TCONS_00001083	XLOC_000617	TCONS_00001083
XLOC_000618	TCONS_00001084	ESCO1	TCONS_00001084	ENSAPLT00000004917
XLOC_000618	TCONS_00001085	ESCO1	ENSAPLT00000004917	ENSAPLT00000004917
XLOC_000618	TCONS_00001086	ESCO1	ENSAPLT00000004921	ENSAPLT00000004921
XLOC_000618	TCONS_00001087	ABHD3	ENSAPLT00000005043	ENSAPLT00000005043
XLOC_000618	TCONS_00001088	ABHD3	TCONS_00001088	ENSAPLT00000005043
XLOC_000619	TCONS_00001089	ENSAPLG00000000148	ENSAPLT00000000148	ENSAPLT00000000148
XLOC_000620	TCONS_00001090	XLOC_000620	TCONS_00001090
XLOC_000620	TCONS_00001091	XLOC_000620	TCONS_00001091
XLOC_000621	TCONS_00001092	XLOC_000621	TCONS_00001092
XLOC_000622	TCONS_00001093	XLOC_000622	TCONS_00001093
XLOC_000623	TCONS_00001094	TMEM241	TCONS_00001094	ENSAPLT00000006628
XLOC_000623	TCONS_00001095	TMEM241	ENSAPLT00000006628	ENSAPLT00000006628
XLOC_000624	TCONS_00001097	NPC1	ENSAPLT00000008095	ENSAPLT00000008095
XLOC_000624	TCONS_00001096	NPC1	TCONS_00001096	ENSAPLT00000008095
XLOC_000624	TCONS_00001098	NPC1	TCONS_00001098	ENSAPLT00000008095
XLOC_000625	TCONS_00001099	ANKRD29	TCONS_00001099	ENSAPLT00000008757
XLOC_000625	TCONS_00001100	ANKRD29	ENSAPLT00000008757	ENSAPLT00000008757
XLOC_000626	TCONS_00001101	XLOC_000626	TCONS_00001101
XLOC_000627	TCONS_00001102	XLOC_000627	TCONS_00001102
XLOC_000628	TCONS_00001103	XLOC_000628	TCONS_00001103
XLOC_000629	TCONS_00001104	XLOC_000629	TCONS_00001104
XLOC_000630	TCONS_00001105	XLOC_000630	TCONS_00001105
XLOC_000631	TCONS_00001106	XLOC_000631	TCONS_00001106
XLOC_000632	TCONS_00001107	XLOC_000632	TCONS_00001107
XLOC_000633	TCONS_00001108	XLOC_000633	TCONS_00001108
XLOC_000634	TCONS_00001109	XLOC_000634	TCONS_00001109
XLOC_000635	TCONS_00001110	ENSAPLG00000002428	ENSAPLT00000002435	ENSAPLT00000002435
XLOC_000636	TCONS_00001111	XLOC_000636	TCONS_00001111
XLOC_000637	TCONS_00001112	XLOC_000637	TCONS_00001112
XLOC_000638	TCONS_00001113	KLHL1	ENSAPLT00000002455	ENSAPLT00000002455
XLOC_000639	TCONS_00001114	XLOC_000639	TCONS_00001114
XLOC_000640	TCONS_00001115	XLOC_000640	TCONS_00001115
XLOC_000641	TCONS_00001116	XLOC_000641	TCONS_00001116
XLOC_000642	TCONS_00001117	XLOC_000642	TCONS_00001117
XLOC_000643	TCONS_00001118	XLOC_000643	TCONS_00001118
XLOC_000644	TCONS_00001119	XLOC_000644	TCONS_00001119
XLOC_000645	TCONS_00001120	XLOC_000645	TCONS_00001120
XLOC_000646	TCONS_00001121	XLOC_000646	TCONS_00001121
XLOC_000647	TCONS_00001122	APRT	ENSAPLT00000007170	ENSAPLT00000007170
XLOC_000648	TCONS_00001123	XLOC_000648	TCONS_00001123
XLOC_000649	TCONS_00001126	PIEZO1	ENSAPLT00000007283	ENSAPLT00000007283
XLOC_000649	TCONS_00001125	PIEZO1	TCONS_00001125	ENSAPLT00000007283
XLOC_000649	TCONS_00001124	PIEZO1	TCONS_00001124	ENSAPLT00000007283
XLOC_000650	TCONS_00001127	RNF166	ENSAPLT00000007547	ENSAPLT00000007547
XLOC_000650	TCONS_00001128	RNF166	TCONS_00001128	ENSAPLT00000007547
XLOC_000650	TCONS_00001129	RNF166	TCONS_00001129	ENSAPLT00000007547
XLOC_000651	TCONS_00001130	ENSAPLG00000007283	ENSAPLT00000007551	ENSAPLT00000007551
XLOC_000651	TCONS_00001131	ENSAPLG00000007283	TCONS_00001131	ENSAPLT00000007551
XLOC_000652	TCONS_00001132	CIDEC	TCONS_00001132	ENSAPLT00000007658
XLOC_000652	TCONS_00001133	CIDEC	ENSAPLT00000007658	ENSAPLT00000007658
XLOC_000653	TCONS_00001134	ENSAPLG00000007542	ENSAPLT00000007835	ENSAPLT00000007835
XLOC_000654	TCONS_00001135	XLOC_000654	TCONS_00001135
XLOC_000655	TCONS_00001136	ENSAPLG00000007677	ENSAPLT00000007958	ENSAPLT00000007958
XLOC_000656	TCONS_00001137	CDT1	ENSAPLT00000007199	ENSAPLT00000007199
XLOC_000657	TCONS_00001138	CTU2	ENSAPLT00000007531	ENSAPLT00000007531
XLOC_000658	TCONS_00001139	PDE2A	ENSAPLT00000007534	ENSAPLT00000007534
XLOC_000659	TCONS_00001140	IL17C	ENSAPLT00000007567	ENSAPLT00000007567
XLOC_000660	TCONS_00001141	ENSAPLG00000007302	ENSAPLT00000007597	ENSAPLT00000007597
XLOC_000660	TCONS_00001143	ENSAPLG00000007302	TCONS_00001143	ENSAPLT00000007597
XLOC_000660	TCONS_00001142	ENSAPLG00000007302	TCONS_00001142	ENSAPLT00000007597
XLOC_000660	TCONS_00001144	ENSAPLG00000007302	TCONS_00001144	ENSAPLT00000007597
XLOC_000661	TCONS_00001145	ZFPM1	ENSAPLT00000007662	ENSAPLT00000007662
XLOC_000662	TCONS_00001146	ENSAPLG00000007283	TCONS_00001146	ENSAPLT00000007551
XLOC_000663	TCONS_00001149	ZNF469	ENSAPLT00000007670	ENSAPLT00000007670
XLOC_000663	TCONS_00001148	ZNF469	TCONS_00001148	ENSAPLT00000007670
XLOC_000663	TCONS_00001147	ZNF469	TCONS_00001147	ENSAPLT00000007670
XLOC_000663	TCONS_00001150	ZNF469	ENSAPLT00000007671	ENSAPLT00000007671
XLOC_000664	TCONS_00001151	XLOC_000664	TCONS_00001151
XLOC_000664	TCONS_00001152	XLOC_000664	TCONS_00001152
XLOC_000665	TCONS_00001153	BANP	TCONS_00001153	ENSAPLT00000007763
XLOC_000665	TCONS_00001154	BANP	ENSAPLT00000007763	ENSAPLT00000007763
XLOC_000666	TCONS_00001155	XLOC_000666	TCONS_00001155
XLOC_000667	TCONS_00001156	CDH10	ENSAPLT00000007760	ENSAPLT00000007760
XLOC_000668	TCONS_00001158	PIBF1	TCONS_00001158	ENSAPLT00000004197
XLOC_000668	TCONS_00001157	PIBF1	TCONS_00001157	ENSAPLT00000004197
XLOC_000668	TCONS_00001159	PIBF1	ENSAPLT00000004197	ENSAPLT00000004197
XLOC_000669	TCONS_00001160	KLF5	ENSAPLT00000004437	ENSAPLT00000004437
XLOC_000670	TCONS_00001161	XLOC_000670	TCONS_00001161
XLOC_000671	TCONS_00001162	XLOC_000671	TCONS_00001162
XLOC_000672	TCONS_00001163	XLOC_000672	TCONS_00001163
XLOC_000673	TCONS_00001164	XLOC_000673	TCONS_00001164
XLOC_000673	TCONS_00001165	XLOC_000673	TCONS_00001165
XLOC_000674	TCONS_00001166	UCHL3	TCONS_00001166	ENSAPLT00000005193
XLOC_000674	TCONS_00001167	UCHL3	ENSAPLT00000005193	ENSAPLT00000005193
XLOC_000675	TCONS_00001169	LMO7	TCONS_00001169	ENSAPLT00000005308
XLOC_000675	TCONS_00001168	LMO7	TCONS_00001168	ENSAPLT00000005308
XLOC_000675	TCONS_00001170	ENSAPLG00000005070	ENSAPLT00000005225	ENSAPLT00000005225
XLOC_000675	TCONS_00001171	LMO7	ENSAPLT00000005308	ENSAPLT00000005308
XLOC_000676	TCONS_00001172	IRG1	TCONS_00001172	ENSAPLT00000005769
XLOC_000676	TCONS_00001173	IRG1	ENSAPLT00000005769	ENSAPLT00000005769
XLOC_000677	TCONS_00001174	CLN5	TCONS_00001174	ENSAPLT00000005813
XLOC_000677	TCONS_00001175	CLN5	ENSAPLT00000005813	ENSAPLT00000005813
XLOC_000678	TCONS_00001176	ENSAPLG00000003971	ENSAPLT00000004071	ENSAPLT00000004071
XLOC_000679	TCONS_00001177	KLF12	ENSAPLT00000001757	ENSAPLT00000001757
XLOC_000679	TCONS_00001178	KLF12	TCONS_00001178	ENSAPLT00000001757
XLOC_000680	TCONS_00001179	XLOC_000680	TCONS_00001179
XLOC_000681	TCONS_00001180	XLOC_000681	TCONS_00001180
XLOC_000682	TCONS_00001181	XLOC_000682	TCONS_00001181
XLOC_000683	TCONS_00001182	XLOC_000683	TCONS_00001182
XLOC_000684	TCONS_00001183	TBC1D4	TCONS_00001183	ENSAPLT00000004555
XLOC_000684	TCONS_00001184	TBC1D4	TCONS_00001184	ENSAPLT00000004555
XLOC_000684	TCONS_00001185	TBC1D4	ENSAPLT00000004555	ENSAPLT00000004555
XLOC_000685	TCONS_00001186	XLOC_000685	TCONS_00001186
XLOC_000686	TCONS_00001187	COMMD6	TCONS_00001187	ENSAPLT00000005170
XLOC_000686	TCONS_00001188	COMMD6	ENSAPLT00000005170	ENSAPLT00000005170
XLOC_000687	TCONS_00001189	ENSAPLG00000005473	ENSAPLT00000005658	ENSAPLT00000005658
XLOC_000688	TCONS_00001190	ENSAPLG00000005619	TCONS_00001190	ENSAPLT00000005808
XLOC_000689	TCONS_00001191	ENSAPLG00000005619	ENSAPLT00000005808	ENSAPLT00000005808
XLOC_000689	TCONS_00001192	ENSAPLG00000005619	TCONS_00001192	ENSAPLT00000005808
XLOC_000690	TCONS_00001193	ENSAPLG00000000795	ENSAPLT00000000770	ENSAPLT00000000770
XLOC_000691	TCONS_00001194	IMPACT	ENSAPLT00000002694	ENSAPLT00000002694
XLOC_000691	TCONS_00001195	IMPACT	ENSAPLT00000002699	ENSAPLT00000002699
XLOC_000692	TCONS_00001196	ENSAPLG00000003483	ENSAPLT00000003545	ENSAPLT00000003545
XLOC_000693	TCONS_00001197	ENSAPLG00000003486	ENSAPLT00000003559	ENSAPLT00000003559
XLOC_000694	TCONS_00001198	ENSAPLG00000000799	ENSAPLT00000000775	ENSAPLT00000000775
XLOC_000695	TCONS_00001199	XLOC_000695	TCONS_00001199
XLOC_000696	TCONS_00001200	ZNF521	TCONS_00001200	ENSAPLT00000003581
XLOC_000697	TCONS_00001202	TAF4B	ENSAPLT00000003829	ENSAPLT00000003829
XLOC_000697	TCONS_00001201	TAF4B	TCONS_00001201	ENSAPLT00000003829
XLOC_000698	TCONS_00001203	XLOC_000698	TCONS_00001203
XLOC_000699	TCONS_00001204	ENSAPLG00000000811	ENSAPLT00000000785	ENSAPLT00000000785
XLOC_000700	TCONS_00001205	XLOC_000700	TCONS_00001205
XLOC_000701	TCONS_00001206	XLOC_000701	TCONS_00001206
XLOC_000702	TCONS_00001207	XLOC_000702	TCONS_00001207
XLOC_000703	TCONS_00001208	XLOC_000703	TCONS_00001208
XLOC_000704	TCONS_00001209	XLOC_000704	TCONS_00001209
XLOC_000705	TCONS_00001210	ENSAPLG00000007015	ENSAPLT00000007308	ENSAPLT00000007308
XLOC_000706	TCONS_00001211	DSG2	ENSAPLT00000008041	ENSAPLT00000008041
XLOC_000707	TCONS_00001212	TTR	ENSAPLT00000009232	ENSAPLT00000009232
XLOC_000708	TCONS_00001213	ENSAPLG00000009008	TCONS_00001213	ENSAPLT00000009363
XLOC_000708	TCONS_00001214	ENSAPLG00000009008	ENSAPLT00000009363	ENSAPLT00000009363
XLOC_000709	TCONS_00001215	XLOC_000709	TCONS_00001215
XLOC_000709	TCONS_00001216	XLOC_000709	TCONS_00001216
XLOC_000710	TCONS_00001217	ENSAPLG00000000790	ENSAPLT00000000766	ENSAPLT00000000766
XLOC_000711	TCONS_00001218	OSBPL1A	TCONS_00001218	ENSAPLT00000016378
XLOC_000711	TCONS_00001219	OSBPL1A	TCONS_00001219	ENSAPLT00000016378
XLOC_000711	TCONS_00001220	OSBPL1A	ENSAPLT00000016378	ENSAPLT00000016378
XLOC_000711	TCONS_00001221	OSBPL1A	TCONS_00001221	ENSAPLT00000016378
XLOC_000712	TCONS_00001222	ENSAPLG00000003516	ENSAPLT00000003578	ENSAPLT00000003578
XLOC_000713	TCONS_00001223	XLOC_000713	TCONS_00001223
XLOC_000714	TCONS_00001225	ZNF521	ENSAPLT00000003581	ENSAPLT00000003581
XLOC_000714	TCONS_00001224	ZNF521	TCONS_00001224	ENSAPLT00000003581
XLOC_000715	TCONS_00001226	ENSAPLG00000000418	ENSAPLT00000000418	ENSAPLT00000000418
XLOC_000716	TCONS_00001227	ENSAPLG00000003626	TCONS_00001227	ENSAPLT00000003699
XLOC_000716	TCONS_00001228	ENSAPLG00000003626	TCONS_00001228	ENSAPLT00000003699
XLOC_000716	TCONS_00001229	ENSAPLG00000003626	TCONS_00001229	ENSAPLT00000003699
XLOC_000716	TCONS_00001230	ENSAPLG00000003626	ENSAPLT00000003699	ENSAPLT00000003699
XLOC_000717	TCONS_00001232	SS18	ENSAPLT00000003726	ENSAPLT00000003726
XLOC_000717	TCONS_00001231	SS18	TCONS_00001231	ENSAPLT00000003726
XLOC_000717	TCONS_00001233	SS18	TCONS_00001233	ENSAPLT00000003726
XLOC_000718	TCONS_00001234	KCTD1	ENSAPLT00000004078	ENSAPLT00000004078
XLOC_000719	TCONS_00001235	XLOC_000719	TCONS_00001235
XLOC_000719	TCONS_00001236	XLOC_000719	TCONS_00001236
XLOC_000720	TCONS_00001237	XLOC_000720	TCONS_00001237
XLOC_000721	TCONS_00001238	AQP4	ENSAPLT00000004140	ENSAPLT00000004140
XLOC_000721	TCONS_00001239	AQP4	TCONS_00001239	ENSAPLT00000004140
XLOC_000722	TCONS_00001240	CHST9	ENSAPLT00000004299	ENSAPLT00000004299
XLOC_000722	TCONS_00001241	CHST9	TCONS_00001241	ENSAPLT00000004299
XLOC_000723	TCONS_00001242	XLOC_000723	TCONS_00001242
XLOC_000724	TCONS_00001244	CDH2	ENSAPLT00000004419	ENSAPLT00000004419
XLOC_000724	TCONS_00001243	CDH2	TCONS_00001243	ENSAPLT00000004419
XLOC_000725	TCONS_00001245	XLOC_000725	TCONS_00001245
XLOC_000725	TCONS_00001246	XLOC_000725	TCONS_00001246
XLOC_000725	TCONS_00001247	XLOC_000725	TCONS_00001247
XLOC_000726	TCONS_00001248	XLOC_000726	TCONS_00001248
XLOC_000727	TCONS_00001249	XLOC_000727	TCONS_00001249
XLOC_000728	TCONS_00001250	XLOC_000728	TCONS_00001250
XLOC_000729	TCONS_00001251	XLOC_000729	TCONS_00001251
XLOC_000730	TCONS_00001252	XLOC_000730	TCONS_00001252
XLOC_000731	TCONS_00001254	ENSAPLG00000005803	ENSAPLT00000006084	ENSAPLT00000006084
XLOC_000731	TCONS_00001253	ENSAPLG00000005803	TCONS_00001253	ENSAPLT00000006084
XLOC_000732	TCONS_00001255	B4GALT6	ENSAPLT00000009397	ENSAPLT00000009397
XLOC_000733	TCONS_00001256	ENSAPLG00000009295	ENSAPLT00000009676	ENSAPLT00000009676
XLOC_000734	TCONS_00001257	ENSAPLG00000012651	ENSAPLT00000013162	ENSAPLT00000013162
XLOC_000735	TCONS_00001258	AHCYL2	ENSAPLT00000016614	ENSAPLT00000016614
XLOC_000735	TCONS_00001259	AHCYL2	TCONS_00001259	ENSAPLT00000016614
XLOC_000736	TCONS_00001261	STRIP2	ENSAPLT00000002386	ENSAPLT00000002386
XLOC_000736	TCONS_00001260	STRIP2	TCONS_00001260	ENSAPLT00000002386
XLOC_000737	TCONS_00001262	XLOC_000737	TCONS_00001262
XLOC_000738	TCONS_00001263	NRF1	TCONS_00001263	ENSAPLT00000003275
XLOC_000738	TCONS_00001264	NRF1	TCONS_00001264	ENSAPLT00000003275
XLOC_000738	TCONS_00001265	NRF1	ENSAPLT00000003275	ENSAPLT00000003275
XLOC_000739	TCONS_00001266	ENSAPLG00000000736	ENSAPLT00000000709	ENSAPLT00000000709
XLOC_000740	TCONS_00001267	KLHDC10	ENSAPLT00000004157	ENSAPLT00000004157
XLOC_000741	TCONS_00001268	ENSAPLG00000005549	ENSAPLT00000005731	ENSAPLT00000005731
XLOC_000742	TCONS_00001269	ENSAPLG00000005551	ENSAPLT00000005786	ENSAPLT00000005786
XLOC_000743	TCONS_00001270	CPA1	ENSAPLT00000006791	ENSAPLT00000006791
XLOC_000744	TCONS_00001271	XLOC_000744	TCONS_00001271
XLOC_000745	TCONS_00001272	MEST	ENSAPLT00000007762	ENSAPLT00000007762
XLOC_000746	TCONS_00001273	XLOC_000746	TCONS_00001273
XLOC_000747	TCONS_00001274	XLOC_000747	TCONS_00001274
XLOC_000747	TCONS_00001275	XLOC_000747	TCONS_00001275
XLOC_000747	TCONS_00001276	XLOC_000747	TCONS_00001276
XLOC_000747	TCONS_00001277	XLOC_000747	TCONS_00001277
XLOC_000748	TCONS_00001278	XLOC_000748	TCONS_00001278
XLOC_000749	TCONS_00001280	ANKRD16	ENSAPLT00000010462	ENSAPLT00000010462
XLOC_000749	TCONS_00001279	ANKRD16	TCONS_00001279	ENSAPLT00000010462
XLOC_000750	TCONS_00001281	XLOC_000750	TCONS_00001281
XLOC_000751	TCONS_00001282	XLOC_000751	TCONS_00001282
XLOC_000752	TCONS_00001283	XLOC_000752	TCONS_00001283
XLOC_000753	TCONS_00001284	XLOC_000753	TCONS_00001284
XLOC_000753	TCONS_00001285	XLOC_000753	TCONS_00001285
XLOC_000754	TCONS_00001286	ENSAPLG00000000376	ENSAPLT00000000376	ENSAPLT00000000376
XLOC_000755	TCONS_00001287	ENSAPLG00000000304	ENSAPLT00000000304	ENSAPLT00000000304
XLOC_000756	TCONS_00001288	UBE2H	ENSAPLT00000003796	ENSAPLT00000003796
XLOC_000757	TCONS_00001290	ZC3HC1	ENSAPLT00000003933	ENSAPLT00000003933
XLOC_000757	TCONS_00001289	ZC3HC1	TCONS_00001289	ENSAPLT00000003933
XLOC_000758	TCONS_00001291	ENSAPLG00000004424	ENSAPLT00000004537	ENSAPLT00000004537
XLOC_000759	TCONS_00001293	TMEM209	ENSAPLT00000004819	ENSAPLT00000004819
XLOC_000759	TCONS_00001292	TMEM209	TCONS_00001292	ENSAPLT00000004819
XLOC_000760	TCONS_00001295	CEP41	ENSAPLT00000007489	ENSAPLT00000007489
XLOC_000760	TCONS_00001294	CEP41	TCONS_00001294	ENSAPLT00000007489
XLOC_000761	TCONS_00001296	COPG2	ENSAPLT00000008331	ENSAPLT00000008331
XLOC_000762	TCONS_00001297	FBXO18	ENSAPLT00000010201	ENSAPLT00000010201
XLOC_000763	TCONS_00001298	YTHDF3	TCONS_00001298	ENSAPLT00000011785
XLOC_000763	TCONS_00001299	YTHDF3	ENSAPLT00000011785	ENSAPLT00000011785
XLOC_000764	TCONS_00001300	ENSAPLG00000000392	ENSAPLT00000000392	ENSAPLT00000000392
XLOC_000765	TCONS_00001301	GGH	ENSAPLT00000011319	ENSAPLT00000011319
XLOC_000766	TCONS_00001302	TTPA	ENSAPLT00000011618	ENSAPLT00000011618
XLOC_000767	TCONS_00001303	CYP7B1	ENSAPLT00000012063	ENSAPLT00000012063
XLOC_000768	TCONS_00001304	EMC4	ENSAPLT00000003812	ENSAPLT00000003812
XLOC_000768	TCONS_00001305	EMC4	TCONS_00001305	ENSAPLT00000003812
XLOC_000769	TCONS_00001306	XLOC_000769	TCONS_00001306
XLOC_000770	TCONS_00001307	XLOC_000770	TCONS_00001307
XLOC_000771	TCONS_00001308	XLOC_000771	TCONS_00001308
XLOC_000772	TCONS_00001309	XLOC_000772	TCONS_00001309
XLOC_000773	TCONS_00001310	XLOC_000773	TCONS_00001310
XLOC_000774	TCONS_00001311	SPATA17	TCONS_00001311	ENSAPLT00000005928
XLOC_000774	TCONS_00001312	SPATA17	ENSAPLT00000005928	ENSAPLT00000005928
XLOC_000774	TCONS_00001313	SPATA17	TCONS_00001313	ENSAPLT00000005928
XLOC_000774	TCONS_00001314	SPATA17	TCONS_00001314	ENSAPLT00000005928
XLOC_000775	TCONS_00001315	RRP15	ENSAPLT00000005988	ENSAPLT00000005988
XLOC_000776	TCONS_00001316	ENSAPLG00000005932	TCONS_00001316	ENSAPLT00000006136
XLOC_000776	TCONS_00001317	ENSAPLG00000005932	ENSAPLT00000006136	ENSAPLT00000006136
XLOC_000777	TCONS_00001318	ENSAPLG00000005298	ENSAPLT00000005468	ENSAPLT00000005468
XLOC_000778	TCONS_00001319	ESRRG	ENSAPLT00000005505	ENSAPLT00000005505
XLOC_000779	TCONS_00001320	XLOC_000779	TCONS_00001320
XLOC_000780	TCONS_00001321	XLOC_000780	TCONS_00001321
XLOC_000781	TCONS_00001322	XLOC_000781	TCONS_00001322
XLOC_000782	TCONS_00001324	GPATCH2	TCONS_00001324	ENSAPLT00000005779
XLOC_000782	TCONS_00001323	GPATCH2	TCONS_00001323	ENSAPLT00000005779
XLOC_000782	TCONS_00001325	GPATCH2	ENSAPLT00000005779	ENSAPLT00000005779
XLOC_000783	TCONS_00001326	XLOC_000783	TCONS_00001326
XLOC_000784	TCONS_00001327	XLOC_000784	TCONS_00001327
XLOC_000785	TCONS_00001328	TMPRSS5	TCONS_00001328	ENSAPLT00000010583
XLOC_000785	TCONS_00001329	TMPRSS5	ENSAPLT00000010583	ENSAPLT00000010583
XLOC_000786	TCONS_00001330	ENSAPLG00000010559	ENSAPLT00000010982	ENSAPLT00000010982
XLOC_000786	TCONS_00001344	ENSAPLG00000012695	ENSAPLT00000013208	ENSAPLT00000013208
XLOC_000786	TCONS_00001346	ENSAPLG00000012695	TCONS_00001346	ENSAPLT00000013208
XLOC_000787	TCONS_00001331	ENSAPLG00000010562	TCONS_00001331	ENSAPLT00000010996
XLOC_000787	TCONS_00001332	ENSAPLG00000010562	ENSAPLT00000010996	ENSAPLT00000010996
XLOC_000788	TCONS_00001333	MPZL2	ENSAPLT00000011334	ENSAPLT00000011334
XLOC_000788	TCONS_00001334	MPZL2	TCONS_00001334	ENSAPLT00000011334
XLOC_000789	TCONS_00001336	MPZL3	ENSAPLT00000011437	ENSAPLT00000011437
XLOC_000789	TCONS_00001335	MPZL3	TCONS_00001335	ENSAPLT00000011437
XLOC_000790	TCONS_00001338	AMICA1	TCONS_00001338	ENSAPLT00000011610
XLOC_000790	TCONS_00001337	AMICA1	TCONS_00001337	ENSAPLT00000011610
XLOC_000790	TCONS_00001339	AMICA1	ENSAPLT00000011610	ENSAPLT00000011610
XLOC_000791	TCONS_00001340	SCN2B	ENSAPLT00000011779	ENSAPLT00000011779
XLOC_000792	TCONS_00001341	SCN4B	ENSAPLT00000011789	ENSAPLT00000011789
XLOC_000793	TCONS_00001343	TMPRSS13	ENSAPLT00000012630	ENSAPLT00000012630
XLOC_000793	TCONS_00001342	TMPRSS13	TCONS_00001342	ENSAPLT00000012630
XLOC_000794	TCONS_00001345	ENSAPLG00000012754	ENSAPLT00000013276	ENSAPLT00000013276
XLOC_000795	TCONS_00001347	DSCAML1	ENSAPLT00000013386	ENSAPLT00000013386
XLOC_000795	TCONS_00001348	DSCAML1	TCONS_00001348	ENSAPLT00000013386
XLOC_000796	TCONS_00001349	BACE1	TCONS_00001349	ENSAPLT00000014965
XLOC_000796	TCONS_00001350	BACE1	ENSAPLT00000014965	ENSAPLT00000014965
XLOC_000797	TCONS_00001351	PCSK7	ENSAPLT00000015611	ENSAPLT00000015611
XLOC_000798	TCONS_00001352	SIK3	TCONS_00001352	ENSAPLT00000001395
XLOC_000798	TCONS_00001353	SIK3	ENSAPLT00000001395	ENSAPLT00000001395
XLOC_000799	TCONS_00001354	APOA1	ENSAPLT00000002601	ENSAPLT00000002601
XLOC_000800	TCONS_00001355	ZPR1	ENSAPLT00000002637	ENSAPLT00000002637
XLOC_000801	TCONS_00001356	BUD13	ENSAPLT00000002687	ENSAPLT00000002687
XLOC_000802	TCONS_00001357	ENSAPLG00000002791	ENSAPLT00000002815	ENSAPLT00000002815
XLOC_000803	TCONS_00001359	ZW10	ENSAPLT00000010648	ENSAPLT00000010648
XLOC_000803	TCONS_00001358	ZW10	TCONS_00001358	ENSAPLT00000010648
XLOC_000804	TCONS_00001360	CD3E	TCONS_00001360	ENSAPLT00000011154
XLOC_000804	TCONS_00001361	CD3E	ENSAPLT00000011154	ENSAPLT00000011154
XLOC_000805	TCONS_00001362	TMPRSS4	ENSAPLT00000012018	ENSAPLT00000012018
XLOC_000805	TCONS_00001363	TMPRSS4	TCONS_00001363	ENSAPLT00000012018
XLOC_000806	TCONS_00001364	IL-10R1	ENSAPLT00000012523	ENSAPLT00000012523
XLOC_000806	TCONS_00001365	IL-10R1	TCONS_00001365	ENSAPLT00000012523
XLOC_000807	TCONS_00001368	CEP164	TCONS_00001368	ENSAPLT00000014590
XLOC_000807	TCONS_00001367	CEP164	TCONS_00001367	ENSAPLT00000014590
XLOC_000807	TCONS_00001366	CEP164	TCONS_00001366	ENSAPLT00000014590
XLOC_000807	TCONS_00001370	CEP164	ENSAPLT00000014590	ENSAPLT00000014590
XLOC_000808	TCONS_00001369	ENSAPLG00000013855	ENSAPLT00000014426	ENSAPLT00000014426
XLOC_000809	TCONS_00001371	RNF214	ENSAPLT00000015379	ENSAPLT00000015379
XLOC_000809	TCONS_00001372	RNF214	TCONS_00001372	ENSAPLT00000015379
XLOC_000810	TCONS_00001373	ENSAPLG00000015639	TCONS_00001373	ENSAPLT00000016293
XLOC_000810	TCONS_00001374	ENSAPLG00000015639	ENSAPLT00000016293	ENSAPLT00000016293
XLOC_000811	TCONS_00001376	SIDT2	ENSAPLT00000016299	ENSAPLT00000016299
XLOC_000811	TCONS_00001375	SIDT2	TCONS_00001375	ENSAPLT00000016299
XLOC_000812	TCONS_00001377	PAFAH1B2	ENSAPLT00000016355	ENSAPLT00000016355
XLOC_000812	TCONS_00001378	PAFAH1B2	TCONS_00001378	ENSAPLT00000016355
XLOC_000813	TCONS_00001379	ENSAPLG00000002591	ENSAPLT00000002602	ENSAPLT00000002602
XLOC_000814	TCONS_00001380	ENSAPLG00000001519	ENSAPLT00000001508	ENSAPLT00000001508
XLOC_000815	TCONS_00001381	ENSAPLG00000001543	ENSAPLT00000001533	ENSAPLT00000001533
XLOC_000816	TCONS_00001382	SLC18B1	TCONS_00001382	ENSAPLT00000008962
XLOC_000816	TCONS_00001383	SLC18B1	ENSAPLT00000008962	ENSAPLT00000008962
XLOC_000817	TCONS_00001384	ENSAPLG00000008745	ENSAPLT00000009094	ENSAPLT00000009094
XLOC_000817	TCONS_00001385	ENSAPLG00000008745	TCONS_00001385	ENSAPLT00000009094
XLOC_000817	TCONS_00001386	ENSAPLG00000008759	ENSAPLT00000009124	ENSAPLT00000009124
XLOC_000817	TCONS_00001387	XLOC_000817	TCONS_00001387
XLOC_000818	TCONS_00001388	TAAR1	ENSAPLT00000000917	ENSAPLT00000000917
XLOC_000819	TCONS_00001389	TAAR2	ENSAPLT00000000920	ENSAPLT00000000920
XLOC_000820	TCONS_00001390	TAAR5	ENSAPLT00000000925	ENSAPLT00000000925
XLOC_000821	TCONS_00001391	STX7	ENSAPLT00000009446	ENSAPLT00000009446
XLOC_000822	TCONS_00001392	MOXD1	ENSAPLT00000009515	ENSAPLT00000009515
XLOC_000823	TCONS_00001393	CTGF	ENSAPLT00000009627	ENSAPLT00000009627
XLOC_000824	TCONS_00001394	XLOC_000824	TCONS_00001394
XLOC_000825	TCONS_00001395	MED23	ENSAPLT00000010807	ENSAPLT00000010807
XLOC_000825	TCONS_00001396	MED23	TCONS_00001396	ENSAPLT00000010807
XLOC_000826	TCONS_00001397	XLOC_000826	TCONS_00001397
XLOC_000827	TCONS_00001398	ENSAPLG00000000949	ENSAPLT00000000930	ENSAPLT00000000930
XLOC_000828	TCONS_00001399	XLOC_000828	TCONS_00001399
XLOC_000828	TCONS_00001400	XLOC_000828	TCONS_00001400
XLOC_000829	TCONS_00001401	EPB41L2	TCONS_00001401	ENSAPLT00000011481
XLOC_000829	TCONS_00001402	EPB41L2	TCONS_00001402	ENSAPLT00000011481
XLOC_000829	TCONS_00001403	EPB41L2	ENSAPLT00000011481	ENSAPLT00000011481
XLOC_000829	TCONS_00001404	EPB41L2	TCONS_00001404	ENSAPLT00000011481
XLOC_000830	TCONS_00001405	XLOC_000830	TCONS_00001405
XLOC_000831	TCONS_00001407	SAMD3	ENSAPLT00000011563	ENSAPLT00000011563
XLOC_000831	TCONS_00001406	SAMD3	TCONS_00001406	ENSAPLT00000011563
XLOC_000832	TCONS_00001408	TMEM244	ENSAPLT00000011868	ENSAPLT00000011868
XLOC_000833	TCONS_00001409	ARHGAP18	TCONS_00001409	ENSAPLT00000011937
XLOC_000833	TCONS_00001410	ARHGAP18	ENSAPLT00000011937	ENSAPLT00000011937
XLOC_000834	TCONS_00001411	ENSAPLG00000013242	ENSAPLT00000013782	ENSAPLT00000013782
XLOC_000835	TCONS_00001412	XLOC_000835	TCONS_00001412
XLOC_000836	TCONS_00001413	PTPRK	TCONS_00001413	ENSAPLT00000014135
XLOC_000836	TCONS_00001414	PTPRK	ENSAPLT00000014135	ENSAPLT00000014135
XLOC_000836	TCONS_00001415	PTPRK	TCONS_00001415	ENSAPLT00000014135
XLOC_000837	TCONS_00001416	THEMIS	TCONS_00001416	ENSAPLT00000016067
XLOC_000837	TCONS_00001417	THEMIS	ENSAPLT00000016067	ENSAPLT00000016067
XLOC_000838	TCONS_00001418	XLOC_000838	TCONS_00001418
XLOC_000839	TCONS_00001419	ENSAPLG00000015530	ENSAPLT00000016180	ENSAPLT00000016180
XLOC_000839	TCONS_00001420	KIAA0408	TCONS_00001420	ENSAPLT00000016318
XLOC_000839	TCONS_00001421	KIAA0408	ENSAPLT00000016318	ENSAPLT00000016318
XLOC_000839	TCONS_00001422	KIAA0408	TCONS_00001422	ENSAPLT00000016318
XLOC_000839	TCONS_00001423	KIAA0408	ENSAPLT00000016320	ENSAPLT00000016320
XLOC_000840	TCONS_00001424	ECHDC1	TCONS_00001424	ENSAPLT00000016384
XLOC_000840	TCONS_00001425	ECHDC1	TCONS_00001425	ENSAPLT00000016384
XLOC_000840	TCONS_00001426	ECHDC1	ENSAPLT00000016384	ENSAPLT00000016384
XLOC_000841	TCONS_00001427	XLOC_000841	TCONS_00001427
XLOC_000842	TCONS_00001428	XLOC_000842	TCONS_00001428
XLOC_000842	TCONS_00001429	XLOC_000842	TCONS_00001429
XLOC_000843	TCONS_00001430	ENSAPLG00000000956	ENSAPLT00000000938	ENSAPLT00000000938
XLOC_000844	TCONS_00001432	HDDC2	ENSAPLT00000003257	ENSAPLT00000003257
XLOC_000844	TCONS_00001431	HDDC2	TCONS_00001431	ENSAPLT00000003257
XLOC_000845	TCONS_00001433	ENSAPLG00000000228	ENSAPLT00000000228	ENSAPLT00000000228
XLOC_000846	TCONS_00001434	SNORD100	ENSAPLT00000000552	ENSAPLT00000000552
XLOC_000847	TCONS_00001435	RPS12	ENSAPLT00000008886	ENSAPLT00000008886
XLOC_000848	TCONS_00001436	SNORA33	ENSAPLT00000000095	ENSAPLT00000000095
XLOC_000849	TCONS_00001437	SNORD100	ENSAPLT00000000516	ENSAPLT00000000516
XLOC_000850	TCONS_00001438	SNORD101	ENSAPLT00000000342	ENSAPLT00000000342
XLOC_000851	TCONS_00001439	XLOC_000851	TCONS_00001439
XLOC_000852	TCONS_00001440	XLOC_000852	TCONS_00001440
XLOC_000852	TCONS_00001441	XLOC_000852	TCONS_00001441
XLOC_000852	TCONS_00001442	XLOC_000852	TCONS_00001442
XLOC_000852	TCONS_00001443	XLOC_000852	TCONS_00001443
XLOC_000853	TCONS_00001445	ENPP1	ENSAPLT00000009934	ENSAPLT00000009934
XLOC_000853	TCONS_00001444	ENPP1	TCONS_00001444	ENSAPLT00000009934
XLOC_000853	TCONS_00001446	ENPP1	TCONS_00001446	ENSAPLT00000009934
XLOC_000854	TCONS_00001447	ENPP3	ENSAPLT00000010304	ENSAPLT00000010304
XLOC_000854	TCONS_00001448	ENPP3	TCONS_00001448	ENSAPLT00000010304
XLOC_000855	TCONS_00001449	XLOC_000855	TCONS_00001449
XLOC_000856	TCONS_00001450	AKAP7	TCONS_00001450	ENSAPLT00000011440
XLOC_000856	TCONS_00001451	AKAP7	ENSAPLT00000011440	ENSAPLT00000011440
XLOC_000857	TCONS_00001452	XLOC_000857	TCONS_00001452
XLOC_000858	TCONS_00001453	XLOC_000858	TCONS_00001453
XLOC_000859	TCONS_00001454	TMEM200A	ENSAPLT00000000932	ENSAPLT00000000932
XLOC_000860	TCONS_00001455	L3MBTL3	TCONS_00001455	ENSAPLT00000011615
XLOC_000860	TCONS_00001456	L3MBTL3	TCONS_00001456	ENSAPLT00000011615
XLOC_000860	TCONS_00001457	L3MBTL3	TCONS_00001457	ENSAPLT00000011615
XLOC_000860	TCONS_00001458	L3MBTL3	ENSAPLT00000011615	ENSAPLT00000011615
XLOC_000861	TCONS_00001459	XLOC_000861	TCONS_00001459
XLOC_000862	TCONS_00001460	LAMA2	TCONS_00001460	ENSAPLT00000012467
XLOC_000862	TCONS_00001464	LAMA2	ENSAPLT00000012467	ENSAPLT00000012467
XLOC_000862	TCONS_00001463	LAMA2	TCONS_00001463	ENSAPLT00000012467
XLOC_000862	TCONS_00001462	LAMA2	TCONS_00001462	ENSAPLT00000012467
XLOC_000862	TCONS_00001461	LAMA2	TCONS_00001461	ENSAPLT00000012467
XLOC_000863	TCONS_00001465	XLOC_000863	TCONS_00001465
XLOC_000863	TCONS_00001466	XLOC_000863	TCONS_00001466
XLOC_000864	TCONS_00001467	XLOC_000864	TCONS_00001467
XLOC_000865	TCONS_00001468	XLOC_000865	TCONS_00001468
XLOC_000866	TCONS_00001469	C6orf58	ENSAPLT00000016142	ENSAPLT00000016142
XLOC_000867	TCONS_00001470	RNF146	TCONS_00001470	ENSAPLT00000000934
XLOC_000867	TCONS_00001472	RNF146	ENSAPLT00000000934	ENSAPLT00000000934
XLOC_000868	TCONS_00001471	XLOC_000868	TCONS_00001471
XLOC_000869	TCONS_00001473	RSPO3	ENSAPLT00000001646	ENSAPLT00000001646
XLOC_000870	TCONS_00001474	CENPW	TCONS_00001474	ENSAPLT00000002177
XLOC_000870	TCONS_00001475	CENPW	ENSAPLT00000002177	ENSAPLT00000002177
XLOC_000871	TCONS_00001476	ENSAPLG00000000955	ENSAPLT00000000937	ENSAPLT00000000937
XLOC_000872	TCONS_00001477	TRMT11	ENSAPLT00000002397	ENSAPLT00000002397
XLOC_000873	TCONS_00001478	NCOA7	TCONS_00001478	ENSAPLT00000002869
XLOC_000873	TCONS_00001479	NCOA7	TCONS_00001479	ENSAPLT00000002869
XLOC_000873	TCONS_00001480	NCOA7	TCONS_00001480	ENSAPLT00000002869
XLOC_000873	TCONS_00001483	NCOA7	ENSAPLT00000002869	ENSAPLT00000002869
XLOC_000874	TCONS_00001481	HINT3	ENSAPLT00000002779	ENSAPLT00000002779
XLOC_000874	TCONS_00001482	HINT3	TCONS_00001482	ENSAPLT00000002779
XLOC_000875	TCONS_00001484	HEY2	ENSAPLT00000003243	ENSAPLT00000003243
XLOC_000876	TCONS_00001485	XLOC_000876	TCONS_00001485
XLOC_000876	TCONS_00001486	XLOC_000876	TCONS_00001486
XLOC_000876	TCONS_00001487	XLOC_000876	TCONS_00001487
XLOC_000877	TCONS_00001488	TPD52L1	ENSAPLT00000003423	ENSAPLT00000003423
XLOC_000878	TCONS_00001489	RNF217	ENSAPLT00000003680	ENSAPLT00000003680
XLOC_000878	TCONS_00001490	RNF217	TCONS_00001490	ENSAPLT00000003680
XLOC_000879	TCONS_00001491	NKAIN2	ENSAPLT00000003691	ENSAPLT00000003691
XLOC_000880	TCONS_00001492	XLOC_000880	TCONS_00001492
XLOC_000881	TCONS_00001493	XLOC_000881	TCONS_00001493
XLOC_000881	TCONS_00001494	XLOC_000881	TCONS_00001494
XLOC_000881	TCONS_00001495	XLOC_000881	TCONS_00001495
XLOC_000882	TCONS_00001497	PCDH18	ENSAPLT00000015001	ENSAPLT00000015001
XLOC_000882	TCONS_00001496	PCDH18	TCONS_00001496	ENSAPLT00000015001
XLOC_000883	TCONS_00001498	XLOC_000883	TCONS_00001498
XLOC_000884	TCONS_00001499	XLOC_000884	TCONS_00001499
XLOC_000885	TCONS_00001500	XLOC_000885	TCONS_00001500
XLOC_000886	TCONS_00001501	XLOC_000886	TCONS_00001501
XLOC_000887	TCONS_00001502	ENSAPLG00000000438	ENSAPLT00000000438	ENSAPLT00000000438
XLOC_000888	TCONS_00001503	XLOC_000888	TCONS_00001503
XLOC_000889	TCONS_00001504	XLOC_000889	TCONS_00001504
XLOC_000890	TCONS_00001505	SCLT1	TCONS_00001505	ENSAPLT00000015418
XLOC_000890	TCONS_00001506	SCLT1	ENSAPLT00000015418	ENSAPLT00000015418
XLOC_000891	TCONS_00001507	XLOC_000891	TCONS_00001507
XLOC_000892	TCONS_00001508	XLOC_000892	TCONS_00001508
XLOC_000893	TCONS_00001509	ENSAPLG00000014537	ENSAPLT00000015194	ENSAPLT00000015194
XLOC_000893	TCONS_00001510	ENSAPLG00000014537	TCONS_00001510	ENSAPLT00000015194
XLOC_000894	TCONS_00001511	U1	ENSAPLT00000000298	ENSAPLT00000000298
XLOC_000895	TCONS_00001512	XLOC_000895	TCONS_00001512
XLOC_000895	TCONS_00001513	XLOC_000895	TCONS_00001513
XLOC_000895	TCONS_00001514	XLOC_000895	TCONS_00001514
XLOC_000896	TCONS_00001515	XLOC_000896	TCONS_00001515
XLOC_000897	TCONS_00001516	XLOC_000897	TCONS_00001516
XLOC_000898	TCONS_00001517	C4ORF33	ENSAPLT00000015371	ENSAPLT00000015371
XLOC_000898	TCONS_00001518	C4ORF33	TCONS_00001518	ENSAPLT00000015371
XLOC_000899	TCONS_00001519	JADE1	TCONS_00001519	ENSAPLT00000015840
XLOC_000899	TCONS_00001520	JADE1	TCONS_00001520	ENSAPLT00000015840
XLOC_000899	TCONS_00001521	JADE1	ENSAPLT00000015840	ENSAPLT00000015840
XLOC_000900	TCONS_00001522	XLOC_000900	TCONS_00001522
XLOC_000901	TCONS_00001523	XLOC_000901	TCONS_00001523
XLOC_000902	TCONS_00001524	TCERG1L	ENSAPLT00000012907	ENSAPLT00000012907
XLOC_000903	TCONS_00001525	TAF3	ENSAPLT00000010448	ENSAPLT00000010448
XLOC_000904	TCONS_00001526	GATA3	ENSAPLT00000010467	ENSAPLT00000010467
XLOC_000905	TCONS_00001527	XLOC_000905	TCONS_00001527
XLOC_000906	TCONS_00001528	XLOC_000906	TCONS_00001528
XLOC_000906	TCONS_00001529	XLOC_000906	TCONS_00001529
XLOC_000907	TCONS_00001530	ENSAPLG00000000295	ENSAPLT00000000295	ENSAPLT00000000295
XLOC_000908	TCONS_00001531	CELF2	TCONS_00001531	ENSAPLT00000010552
XLOC_000908	TCONS_00001532	CELF2	ENSAPLT00000010552	ENSAPLT00000010552
XLOC_000908	TCONS_00001533	CELF2	TCONS_00001533	ENSAPLT00000010552
XLOC_000909	TCONS_00001534	ENSAPLG00000010143	ENSAPLT00000010554	ENSAPLT00000010554
XLOC_000910	TCONS_00001535	ECHDC3	ENSAPLT00000010695	ENSAPLT00000010695
XLOC_000910	TCONS_00001536	ECHDC3	TCONS_00001536	ENSAPLT00000010695
XLOC_000911	TCONS_00001537	PROSER2	ENSAPLT00000010698	ENSAPLT00000010698
XLOC_000912	TCONS_00001538	ENSAPLG00000010282	ENSAPLT00000010701	ENSAPLT00000010701
XLOC_000913	TCONS_00001539	DHTKD1	ENSAPLT00000010787	ENSAPLT00000010787
XLOC_000913	TCONS_00001540	DHTKD1	TCONS_00001540	ENSAPLT00000010787
XLOC_000914	TCONS_00001542	USP6NL	ENSAPLT00000010615	ENSAPLT00000010615
XLOC_000914	TCONS_00001541	USP6NL	TCONS_00001541	ENSAPLT00000010615
XLOC_000914	TCONS_00001543	USP6NL	TCONS_00001543	ENSAPLT00000010615
XLOC_000915	TCONS_00001544	XLOC_000915	TCONS_00001544
XLOC_000915	TCONS_00001545	XLOC_000915	TCONS_00001545
XLOC_000915	TCONS_00001546	XLOC_000915	TCONS_00001546
XLOC_000915	TCONS_00001547	XLOC_000915	TCONS_00001547
XLOC_000916	TCONS_00001549	UPF2	TCONS_00001549	ENSAPLT00000010758
XLOC_000916	TCONS_00001548	UPF2	TCONS_00001548	ENSAPLT00000010758
XLOC_000916	TCONS_00001550	UPF2	ENSAPLT00000010758	ENSAPLT00000010758
XLOC_000917	TCONS_00001551	RIT2	ENSAPLT00000011379	ENSAPLT00000011379
XLOC_000917	TCONS_00001553	RIT2	TCONS_00001553	ENSAPLT00000011379
XLOC_000917	TCONS_00001552	RIT2	TCONS_00001552	ENSAPLT00000011379
XLOC_000918	TCONS_00001555	ENSAPLG00000008575	ENSAPLT00000008938	ENSAPLT00000008938
XLOC_000918	TCONS_00001554	ENSAPLG00000008575	TCONS_00001554	ENSAPLT00000008938
XLOC_000919	TCONS_00001556	RBM41	ENSAPLT00000009202	ENSAPLT00000009202
XLOC_000919	TCONS_00001557	RBM41	TCONS_00001557	ENSAPLT00000009202
XLOC_000920	TCONS_00001558	MORC4	ENSAPLT00000009227	ENSAPLT00000009227
XLOC_000921	TCONS_00001559	RIPPLY1	ENSAPLT00000001850	ENSAPLT00000001850
XLOC_000922	TCONS_00001560	XLOC_000922	TCONS_00001560
XLOC_000923	TCONS_00001561	PRRG3	ENSAPLT00000009404	ENSAPLT00000009404
XLOC_000924	TCONS_00001564	ENSAPLG00000009125	TCONS_00001564	ENSAPLT00000009487
XLOC_000924	TCONS_00001563	ENSAPLG00000009125	TCONS_00001563	ENSAPLT00000009487
XLOC_000924	TCONS_00001562	ENSAPLG00000009125	TCONS_00001562	ENSAPLT00000009487
XLOC_000924	TCONS_00001565	ENSAPLG00000009125	ENSAPLT00000009487	ENSAPLT00000009487
XLOC_000925	TCONS_00001566	CNGA2	ENSAPLT00000009546	ENSAPLT00000009546
XLOC_000926	TCONS_00001568	ENSAPLG00000010479	ENSAPLT00000010906	ENSAPLT00000010906
XLOC_000926	TCONS_00001567	ENSAPLG00000010479	TCONS_00001567	ENSAPLT00000010906
XLOC_000927	TCONS_00001569	ENSAPLG00000008513	ENSAPLT00000008840	ENSAPLT00000008840
XLOC_000928	TCONS_00001570	PIH1D3	ENSAPLT00000008848	ENSAPLT00000008848
XLOC_000929	TCONS_00001571	CLDN2	ENSAPLT00000001843	ENSAPLT00000001843
XLOC_000929	TCONS_00001572	CLDN2	TCONS_00001572	ENSAPLT00000001843
XLOC_000930	TCONS_00001573	XLOC_000930	TCONS_00001573
XLOC_000931	TCONS_00001574	GABRE	ENSAPLT00000009709	ENSAPLT00000009709
XLOC_000932	TCONS_00001575	GABRA3	ENSAPLT00000010558	ENSAPLT00000010558
XLOC_000932	TCONS_00001576	GABRA3	TCONS_00001576	ENSAPLT00000010558
XLOC_000933	TCONS_00001577	XLOC_000933	TCONS_00001577
XLOC_000934	TCONS_00001578	SOX3	ENSAPLT00000011008	ENSAPLT00000011008
XLOC_000935	TCONS_00001579	SLITRK4	ENSAPLT00000001856	ENSAPLT00000001856
XLOC_000936	TCONS_00001580	ODF3	ENSAPLT00000011158	ENSAPLT00000011158
XLOC_000937	TCONS_00001581	AACS	TCONS_00001581	ENSAPLT00000010347
XLOC_000937	TCONS_00001582	AACS	ENSAPLT00000010347	ENSAPLT00000010347
XLOC_000938	TCONS_00001583	DHX37	ENSAPLT00000010012	ENSAPLT00000010012
XLOC_000939	TCONS_00001584	BRI3BP	ENSAPLT00000010275	ENSAPLT00000010275
XLOC_000939	TCONS_00001585	BRI3BP	TCONS_00001585	ENSAPLT00000010275
XLOC_000939	TCONS_00001586	BRI3BP	TCONS_00001586	ENSAPLT00000010275
XLOC_000940	TCONS_00001587	XLOC_000940	TCONS_00001587
XLOC_000941	TCONS_00001588	XLOC_000941	TCONS_00001588
XLOC_000942	TCONS_00001589	XLOC_000942	TCONS_00001589
XLOC_000943	TCONS_00001590	XLOC_000943	TCONS_00001590
XLOC_000944	TCONS_00001591	XLOC_000944	TCONS_00001591
XLOC_000945	TCONS_00001592	XLOC_000945	TCONS_00001592
XLOC_000946	TCONS_00001593	XLOC_000946	TCONS_00001593
XLOC_000947	TCONS_00001594	XLOC_000947	TCONS_00001594
XLOC_000948	TCONS_00001595	U6	ENSAPLT00000000106	ENSAPLT00000000106
XLOC_000949	TCONS_00001596	XLOC_000949	TCONS_00001596
XLOC_000950	TCONS_00001597	XLOC_000950	TCONS_00001597
XLOC_000951	TCONS_00001598	SPRY2	TCONS_00001598	ENSAPLT00000012065
XLOC_000951	TCONS_00001599	SPRY2	ENSAPLT00000012065	ENSAPLT00000012065
XLOC_000952	TCONS_00001600	XLOC_000952	TCONS_00001600
XLOC_000953	TCONS_00001601	XLOC_000953	TCONS_00001601
XLOC_000954	TCONS_00001603	RBM26	ENSAPLT00000012096	ENSAPLT00000012096
XLOC_000954	TCONS_00001602	RBM26	TCONS_00001602	ENSAPLT00000012096
XLOC_000955	TCONS_00001604	XLOC_000955	TCONS_00001604
XLOC_000956	TCONS_00001605	RNF219	ENSAPLT00000012730	ENSAPLT00000012730
XLOC_000956	TCONS_00001606	RNF219	TCONS_00001606	ENSAPLT00000012730
XLOC_000957	TCONS_00001607	XLOC_000957	TCONS_00001607
XLOC_000958	TCONS_00001608	EDNRB	ENSAPLT00000012830	ENSAPLT00000012830
XLOC_000958	TCONS_00001609	EDNRB	TCONS_00001609	ENSAPLT00000012830
XLOC_000958	TCONS_00001610	EDNRB	TCONS_00001610	ENSAPLT00000012830
XLOC_000959	TCONS_00001613	ENSAPLG00000012782	TCONS_00001613	ENSAPLT00000013438
XLOC_000959	TCONS_00001614	ENSAPLG00000012782	TCONS_00001614	ENSAPLT00000013438
XLOC_000959	TCONS_00001612	ENSAPLG00000012782	TCONS_00001612	ENSAPLT00000013438
XLOC_000959	TCONS_00001611	ENSAPLG00000012782	TCONS_00001611	ENSAPLT00000013438
XLOC_000959	TCONS_00001616	ENSAPLG00000012782	ENSAPLT00000013438	ENSAPLT00000013438
XLOC_000960	TCONS_00001615	ENSAPLG00000000251	ENSAPLT00000000251	ENSAPLT00000000251
XLOC_000961	TCONS_00001617	XLOC_000961	TCONS_00001617
XLOC_000962	TCONS_00001618	XLOC_000962	TCONS_00001618
XLOC_000963	TCONS_00001619	XLOC_000963	TCONS_00001619
XLOC_000964	TCONS_00001620	XLOC_000964	TCONS_00001620
XLOC_000965	TCONS_00001621	XLOC_000965	TCONS_00001621
XLOC_000966	TCONS_00001622	XLOC_000966	TCONS_00001622
XLOC_000967	TCONS_00001623	XLOC_000967	TCONS_00001623
XLOC_000968	TCONS_00001624	XLOC_000968	TCONS_00001624
XLOC_000969	TCONS_00001625	ENSAPLG00000011586	ENSAPLT00000012052	ENSAPLT00000012052
XLOC_000970	TCONS_00001626	XLOC_000970	TCONS_00001626
XLOC_000971	TCONS_00001627	XLOC_000971	TCONS_00001627
XLOC_000972	TCONS_00001628	XLOC_000972	TCONS_00001628
XLOC_000973	TCONS_00001629	XLOC_000973	TCONS_00001629
XLOC_000974	TCONS_00001630	NDFIP2	ENSAPLT00000011876	ENSAPLT00000011876
XLOC_000974	TCONS_00001631	NDFIP2	TCONS_00001631	ENSAPLT00000011876
XLOC_000975	TCONS_00001632	U2	ENSAPLT00000000374	ENSAPLT00000000374
XLOC_000976	TCONS_00001633	XLOC_000976	TCONS_00001633
XLOC_000977	TCONS_00001634	SLAIN1	ENSAPLT00000013272	ENSAPLT00000013272
XLOC_000978	TCONS_00001635	SCEL	TCONS_00001635	ENSAPLT00000013298
XLOC_000978	TCONS_00001638	SCEL	TCONS_00001638	ENSAPLT00000013298
XLOC_000978	TCONS_00001637	SCEL	TCONS_00001637	ENSAPLT00000013298
XLOC_000978	TCONS_00001636	SCEL	TCONS_00001636	ENSAPLT00000013298
XLOC_000978	TCONS_00001639	SCEL	ENSAPLT00000013298	ENSAPLT00000013298
XLOC_000979	TCONS_00001640	ENSAPLG00000011555	ENSAPLT00000012019	ENSAPLT00000012019
XLOC_000980	TCONS_00001641	TRMT10C	TCONS_00001641	ENSAPLT00000012026
XLOC_000980	TCONS_00001642	TRMT10C	ENSAPLT00000012026	ENSAPLT00000012026
XLOC_000981	TCONS_00001644	PCNP	ENSAPLT00000003081	ENSAPLT00000003081
XLOC_000981	TCONS_00001643	PCNP	TCONS_00001643	ENSAPLT00000003081
XLOC_000982	TCONS_00001645	ENSAPLG00000011568	ENSAPLT00000012032	ENSAPLT00000012032
XLOC_000983	TCONS_00001646	CEP97	TCONS_00001646	ENSAPLT00000004200
XLOC_000983	TCONS_00001647	CEP97	ENSAPLT00000004200	ENSAPLT00000004200
XLOC_000984	TCONS_00001648	NXPE3	TCONS_00001648	ENSAPLT00000004215
XLOC_000984	TCONS_00001649	NXPE3	ENSAPLT00000004215	ENSAPLT00000004215
XLOC_000985	TCONS_00001650	NFKBIZ	TCONS_00001650	ENSAPLT00000004301
XLOC_000985	TCONS_00001652	NFKBIZ	ENSAPLT00000004301	ENSAPLT00000004301
XLOC_000985	TCONS_00001651	NFKBIZ	TCONS_00001651	ENSAPLT00000004301
XLOC_000986	TCONS_00001653	XLOC_000986	TCONS_00001653
XLOC_000986	TCONS_00001655	XLOC_000986	TCONS_00001655
XLOC_000986	TCONS_00001654	XLOC_000986	TCONS_00001654
XLOC_000987	TCONS_00001656	ZPLD1	TCONS_00001656	ENSAPLT00000004638
XLOC_000987	TCONS_00001657	ZPLD1	TCONS_00001657	ENSAPLT00000004638
XLOC_000987	TCONS_00001658	ZPLD1	TCONS_00001658	ENSAPLT00000004638
XLOC_000987	TCONS_00001659	ZPLD1	ENSAPLT00000004638	ENSAPLT00000004638
XLOC_000988	TCONS_00001660	XLOC_000988	TCONS_00001660
XLOC_000989	TCONS_00001661	XLOC_000989	TCONS_00001661
XLOC_000989	TCONS_00001663	IMPG2	TCONS_00001663	ENSAPLT00000002580
XLOC_000989	TCONS_00001662	IMPG2	TCONS_00001662	ENSAPLT00000002580
XLOC_000989	TCONS_00001664	IMPG2	ENSAPLT00000002580	ENSAPLT00000002580
XLOC_000990	TCONS_00001665	SENP7	ENSAPLT00000002709	ENSAPLT00000002709
XLOC_000990	TCONS_00001666	SENP7	TCONS_00001666	ENSAPLT00000002709
XLOC_000990	TCONS_00001667	SENP7	TCONS_00001667	ENSAPLT00000002709
XLOC_000991	TCONS_00001668	TXNL4B	ENSAPLT00000003034	ENSAPLT00000003034
XLOC_000992	TCONS_00001669	ZBTB11	TCONS_00001669	ENSAPLT00000003519
XLOC_000992	TCONS_00001670	ZBTB11	TCONS_00001670	ENSAPLT00000003519
XLOC_000992	TCONS_00001671	ZBTB11	ENSAPLT00000003519	ENSAPLT00000003519
XLOC_000993	TCONS_00001672	RPL24	ENSAPLT00000003921	ENSAPLT00000003921
XLOC_000994	TCONS_00001673	XLOC_000994	TCONS_00001673
XLOC_000995	TCONS_00001674	XLOC_000995	TCONS_00001674
XLOC_000996	TCONS_00001675	SLC17A5	TCONS_00001675	ENSAPLT00000008916
XLOC_000996	TCONS_00001677	SLC17A5	ENSAPLT00000008916	ENSAPLT00000008916
XLOC_000996	TCONS_00001676	SLC17A5	TCONS_00001676	ENSAPLT00000008916
XLOC_000997	TCONS_00001678	EEF1A1	TCONS_00001678	ENSAPLT00000009802
XLOC_000997	TCONS_00001679	EEF1A1	ENSAPLT00000009802	ENSAPLT00000009802
XLOC_000998	TCONS_00001681	MB21D1	ENSAPLT00000010568	ENSAPLT00000010568
XLOC_000998	TCONS_00001680	MB21D1	TCONS_00001680	ENSAPLT00000010568
XLOC_000999	TCONS_00001682	XLOC_000999	TCONS_00001682
XLOC_001000	TCONS_00001683	ASRGL1	TCONS_00001683	ENSAPLT00000012339
XLOC_001000	TCONS_00001684	ASRGL1	TCONS_00001684	ENSAPLT00000012339
XLOC_001000	TCONS_00001685	ASRGL1	TCONS_00001685	ENSAPLT00000012339
XLOC_001000	TCONS_00001686	ASRGL1	ENSAPLT00000012339	ENSAPLT00000012339
XLOC_001001	TCONS_00001688	ENSAPLG00000000110	TCONS_00001688	ENSAPLT00000000110
XLOC_001001	TCONS_00001687	ENSAPLG00000000110	TCONS_00001687	ENSAPLT00000000110
XLOC_001001	TCONS_00001689	ENSAPLG00000000110	TCONS_00001689	ENSAPLT00000000110
XLOC_001002	TCONS_00001690	ENSAPLG00000000012	ENSAPLT00000000012	ENSAPLT00000000012
XLOC_001003	TCONS_00001691	ENSAPLG00000000110	ENSAPLT00000000110	ENSAPLT00000000110
XLOC_001004	TCONS_00001693	OGFRL1	ENSAPLT00000012450	ENSAPLT00000012450
XLOC_001004	TCONS_00001692	OGFRL1	TCONS_00001692	ENSAPLT00000012450
XLOC_001005	TCONS_00001694	B3GAT2	ENSAPLT00000012488	ENSAPLT00000012488
XLOC_001006	TCONS_00001695	COL9A1	ENSAPLT00000013518	ENSAPLT00000013518
XLOC_001006	TCONS_00001697	COL9A1	TCONS_00001697	ENSAPLT00000013518
XLOC_001006	TCONS_00001696	COL9A1	TCONS_00001696	ENSAPLT00000013518
XLOC_001007	TCONS_00001699	LMBRD1	ENSAPLT00000016770	ENSAPLT00000016770
XLOC_001007	TCONS_00001698	LMBRD1	TCONS_00001698	ENSAPLT00000016770
XLOC_001008	TCONS_00001700	BAI3	TCONS_00001700	ENSAPLT00000017089
XLOC_001009	TCONS_00001701	XLOC_001009	TCONS_00001701
XLOC_001010	TCONS_00001702	XLOC_001010	TCONS_00001702
XLOC_001011	TCONS_00001703	XLOC_001011	TCONS_00001703
XLOC_001012	TCONS_00001704	XLOC_001012	TCONS_00001704
XLOC_001013	TCONS_00001705	XLOC_001013	TCONS_00001705
XLOC_001013	TCONS_00001706	XLOC_001013	TCONS_00001706
XLOC_001014	TCONS_00001707	XLOC_001014	TCONS_00001707
XLOC_001015	TCONS_00001708	XLOC_001015	TCONS_00001708
XLOC_001016	TCONS_00001709	XLOC_001016	TCONS_00001709
XLOC_001017	TCONS_00001710	XLOC_001017	TCONS_00001710
XLOC_001018	TCONS_00001711	XLOC_001018	TCONS_00001711
XLOC_001019	TCONS_00001712	XLOC_001019	TCONS_00001712
XLOC_001020	TCONS_00001713	XLOC_001020	TCONS_00001713
XLOC_001021	TCONS_00001714	XLOC_001021	TCONS_00001714
XLOC_001022	TCONS_00001715	XLOC_001022	TCONS_00001715
XLOC_001023	TCONS_00001716	XLOC_001023	TCONS_00001716
XLOC_001024	TCONS_00001717	ENSAPLG00000003000	ENSAPLT00000003028	ENSAPLT00000003028
XLOC_001025	TCONS_00001718	XLOC_001025	TCONS_00001718
XLOC_001026	TCONS_00001719	U6	ENSAPLT00000000402	ENSAPLT00000000402
XLOC_001027	TCONS_00001720	XLOC_001027	TCONS_00001720
XLOC_001028	TCONS_00001721	CD109	ENSAPLT00000008257	ENSAPLT00000008257
XLOC_001028	TCONS_00001723	CD109	TCONS_00001723	ENSAPLT00000008257
XLOC_001028	TCONS_00001722	CD109	TCONS_00001722	ENSAPLT00000008257
XLOC_001029	TCONS_00001724	MTO1	ENSAPLT00000010326	ENSAPLT00000010326
XLOC_001029	TCONS_00001725	MTO1	TCONS_00001725	ENSAPLT00000010326
XLOC_001030	TCONS_00001726	ENSAPLG00000010182	ENSAPLT00000010609	ENSAPLT00000010609
XLOC_001030	TCONS_00001728	ENSAPLG00000010182	TCONS_00001728	ENSAPLT00000010613
XLOC_001030	TCONS_00001727	ENSAPLG00000010182	TCONS_00001727	ENSAPLT00000010613
XLOC_001030	TCONS_00001729	ENSAPLG00000010182	ENSAPLT00000010613	ENSAPLT00000010613
XLOC_001031	TCONS_00001731	KCNQ5	ENSAPLT00000010802	ENSAPLT00000010802
XLOC_001031	TCONS_00001730	KCNQ5	TCONS_00001730	ENSAPLT00000010802
XLOC_001032	TCONS_00001732	RIMS1	TCONS_00001732	ENSAPLT00000010966
XLOC_001032	TCONS_00001734	RIMS1	ENSAPLT00000010966	ENSAPLT00000010966
XLOC_001032	TCONS_00001733	RIMS1	TCONS_00001733	ENSAPLT00000010966
XLOC_001033	TCONS_00001735	XLOC_001033	TCONS_00001735
XLOC_001033	TCONS_00001736	XLOC_001033	TCONS_00001736
XLOC_001034	TCONS_00001737	SMAP1	TCONS_00001737	ENSAPLT00000012560
XLOC_001034	TCONS_00001739	SMAP1	ENSAPLT00000012560	ENSAPLT00000012560
XLOC_001034	TCONS_00001738	SMAP1	TCONS_00001738	ENSAPLT00000012560
XLOC_001035	TCONS_00001740	FAM135A	TCONS_00001740	ENSAPLT00000012760
XLOC_001035	TCONS_00001741	C6orf57	ENSAPLT00000012662	ENSAPLT00000012662
XLOC_001035	TCONS_00001742	C6orf57	ENSAPLT00000012660	ENSAPLT00000012660
XLOC_001035	TCONS_00001743	FAM135A	ENSAPLT00000012760	ENSAPLT00000012760
XLOC_001035	TCONS_00001744	FAM135A	TCONS_00001744	ENSAPLT00000012760
XLOC_001035	TCONS_00001745	FAM135A	TCONS_00001745	ENSAPLT00000012760
XLOC_001036	TCONS_00001746	COL19A1	TCONS_00001746	ENSAPLT00000015835
XLOC_001036	TCONS_00001747	COL19A1	TCONS_00001747	ENSAPLT00000015835
XLOC_001036	TCONS_00001748	COL19A1	TCONS_00001748	ENSAPLT00000015835
XLOC_001036	TCONS_00001749	COL19A1	ENSAPLT00000015835	ENSAPLT00000015835
XLOC_001037	TCONS_00001750	BAI3	ENSAPLT00000017089	ENSAPLT00000017089
XLOC_001038	TCONS_00001751	XLOC_001038	TCONS_00001751
XLOC_001039	TCONS_00001752	XLOC_001039	TCONS_00001752
XLOC_001040	TCONS_00001753	XLOC_001040	TCONS_00001753
XLOC_001041	TCONS_00001754	XLOC_001041	TCONS_00001754
XLOC_001042	TCONS_00001755	XLOC_001042	TCONS_00001755
XLOC_001043	TCONS_00001756	XLOC_001043	TCONS_00001756
XLOC_001044	TCONS_00001757	XLOC_001044	TCONS_00001757
XLOC_001045	TCONS_00001758	XLOC_001045	TCONS_00001758
XLOC_001046	TCONS_00001759	XLOC_001046	TCONS_00001759
XLOC_001047	TCONS_00001760	XLOC_001047	TCONS_00001760
XLOC_001048	TCONS_00001761	XLOC_001048	TCONS_00001761
XLOC_001049	TCONS_00001762	XLOC_001049	TCONS_00001762
XLOC_001050	TCONS_00001763	ENSAPLG00000000347	ENSAPLT00000000347	ENSAPLT00000000347
XLOC_001051	TCONS_00001764	ENSAPLG00000001854	ENSAPLT00000001848	ENSAPLT00000001848
XLOC_001052	TCONS_00001765	XLOC_001052	TCONS_00001765
XLOC_001052	TCONS_00001766	XLOC_001052	TCONS_00001766
XLOC_001053	TCONS_00001767	OTUD1	ENSAPLT00000001849	ENSAPLT00000001849
XLOC_001054	TCONS_00001768	XLOC_001054	TCONS_00001768
XLOC_001054	TCONS_00001770	XLOC_001054	TCONS_00001770
XLOC_001054	TCONS_00001769	XLOC_001054	TCONS_00001769
XLOC_001055	TCONS_00001771	KIAA1217	TCONS_00001771	ENSAPLT00000008134
XLOC_001055	TCONS_00001773	KIAA1217	TCONS_00001773	ENSAPLT00000008134
XLOC_001055	TCONS_00001772	KIAA1217	TCONS_00001772	ENSAPLT00000008134
XLOC_001055	TCONS_00001774	KIAA1217	ENSAPLT00000008134	ENSAPLT00000008134
XLOC_001055	TCONS_00001775	KIAA1217	TCONS_00001775	ENSAPLT00000008134
XLOC_001056	TCONS_00001776	U1	ENSAPLT00000000403	ENSAPLT00000000403
XLOC_001057	TCONS_00001777	THNSL1	TCONS_00001777	ENSAPLT00000001854
XLOC_001057	TCONS_00001778	THNSL1	ENSAPLT00000001854	ENSAPLT00000001854
XLOC_001058	TCONS_00001779	XLOC_001058	TCONS_00001779
XLOC_001059	TCONS_00001780	XLOC_001059	TCONS_00001780
XLOC_001060	TCONS_00001781	XLOC_001060	TCONS_00001781
XLOC_001061	TCONS_00001783	ARHGAP21	TCONS_00001783	ENSAPLT00000008512
XLOC_001061	TCONS_00001782	ARHGAP21	TCONS_00001782	ENSAPLT00000008512
XLOC_001061	TCONS_00001784	ARHGAP21	ENSAPLT00000008512	ENSAPLT00000008512
XLOC_001062	TCONS_00001785	PRTFDC1	ENSAPLT00000009421	ENSAPLT00000009421
XLOC_001063	TCONS_00001786	ENKUR	TCONS_00001786	ENSAPLT00000009649
XLOC_001063	TCONS_00001787	ENKUR	ENSAPLT00000009649	ENSAPLT00000009649
XLOC_001064	TCONS_00001788	XLOC_001064	TCONS_00001788
XLOC_001065	TCONS_00001789	ENSAPLG00000014711	TCONS_00001789	ENSAPLT00000015332
XLOC_001065	TCONS_00001790	ENSAPLG00000014711	ENSAPLT00000015332	ENSAPLT00000015332
XLOC_001065	TCONS_00001791	ENSAPLG00000014711	ENSAPLT00000015335	ENSAPLT00000015335
XLOC_001066	TCONS_00001792	ATP6V1D	ENSAPLT00000015968	ENSAPLT00000015968
XLOC_001067	TCONS_00001794	XLOC_001067	TCONS_00001794
XLOC_001067	TCONS_00001793	XLOC_001067	TCONS_00001793
XLOC_001067	TCONS_00001795	XLOC_001067	TCONS_00001795
XLOC_001068	TCONS_00001796	BMF	TCONS_00001796	ENSAPLT00000003220
XLOC_001068	TCONS_00001797	BMF	TCONS_00001797	ENSAPLT00000003220
XLOC_001068	TCONS_00001798	BMF	ENSAPLT00000003220	ENSAPLT00000003220
XLOC_001069	TCONS_00001799	XLOC_001069	TCONS_00001799
XLOC_001070	TCONS_00001800	SRP14	ENSAPLT00000003290	ENSAPLT00000003290
XLOC_001071	TCONS_00001801	GPR176	TCONS_00001801	ENSAPLT00000003870
XLOC_001071	TCONS_00001802	GPR176	ENSAPLT00000003870	ENSAPLT00000003870
XLOC_001072	TCONS_00001803	FSIP1	TCONS_00001803	ENSAPLT00000003943
XLOC_001072	TCONS_00001804	FSIP1	ENSAPLT00000003935	ENSAPLT00000003935
XLOC_001072	TCONS_00001805	FSIP1	TCONS_00001805	ENSAPLT00000003943
XLOC_001072	TCONS_00001806	FSIP1	ENSAPLT00000003943	ENSAPLT00000003943
XLOC_001073	TCONS_00001807	ENSAPLG00000000649	TCONS_00001807	ENSAPLT00000000622
XLOC_001073	TCONS_00001808	ENSAPLG00000000649	ENSAPLT00000000622	ENSAPLT00000000622
XLOC_001074	TCONS_00001809	XLOC_001074	TCONS_00001809
XLOC_001075	TCONS_00001810	KATNBL1	TCONS_00001810	ENSAPLT00000004885
XLOC_001075	TCONS_00001811	KATNBL1	TCONS_00001811	ENSAPLT00000004885
XLOC_001075	TCONS_00001812	KATNBL1	ENSAPLT00000004885	ENSAPLT00000004885
XLOC_001076	TCONS_00001813	EMC7	ENSAPLT00000005144	ENSAPLT00000005144
XLOC_001076	TCONS_00001814	EMC7	TCONS_00001814	ENSAPLT00000005144
XLOC_001077	TCONS_00001815	ENSAPLG00000005093	ENSAPLT00000005249	ENSAPLT00000005249
XLOC_001078	TCONS_00001816	AVEN	ENSAPLT00000005268	ENSAPLT00000005268
XLOC_001078	TCONS_00001817	AVEN	ENSAPLT00000005272	ENSAPLT00000005272
XLOC_001079	TCONS_00001818	FMN1	ENSAPLT00000006082	ENSAPLT00000006082
XLOC_001079	TCONS_00001820	FMN1	TCONS_00001820	ENSAPLT00000006082
XLOC_001079	TCONS_00001819	FMN1	TCONS_00001819	ENSAPLT00000006082
XLOC_001080	TCONS_00001821	RASGRP1	ENSAPLT00000006703	ENSAPLT00000006703
XLOC_001080	TCONS_00001822	RASGRP1	TCONS_00001822	ENSAPLT00000006703
XLOC_001081	TCONS_00001823	ENSAPLG00000007322	TCONS_00001823	ENSAPLT00000007592
XLOC_001082	TCONS_00001826	MEIS2	ENSAPLT00000007631	ENSAPLT00000007631
XLOC_001082	TCONS_00001825	MEIS2	TCONS_00001825	ENSAPLT00000007631
XLOC_001082	TCONS_00001824	MEIS2	TCONS_00001824	ENSAPLT00000007631
XLOC_001083	TCONS_00001827	XLOC_001083	TCONS_00001827
XLOC_001084	TCONS_00001828	XLOC_001084	TCONS_00001828
XLOC_001085	TCONS_00001829	DPH6	ENSAPLT00000008122	ENSAPLT00000008122
XLOC_001085	TCONS_00001830	DPH6	TCONS_00001830	ENSAPLT00000008122
XLOC_001086	TCONS_00001831	XLOC_001086	TCONS_00001831
XLOC_001087	TCONS_00001832	XLOC_001087	TCONS_00001832
XLOC_001088	TCONS_00001833	ZNF770	ENSAPLT00000008432	ENSAPLT00000008432
XLOC_001089	TCONS_00001835	AQR	TCONS_00001835	ENSAPLT00000008533
XLOC_001089	TCONS_00001834	AQR	TCONS_00001834	ENSAPLT00000008533
XLOC_001089	TCONS_00001836	AQR	ENSAPLT00000008533	ENSAPLT00000008533
XLOC_001090	TCONS_00001837	ENSAPLG00000009291	ENSAPLT00000009675	ENSAPLT00000009675
XLOC_001091	TCONS_00001838	GJD2	ENSAPLT00000009820	ENSAPLT00000009820
XLOC_001092	TCONS_00001839	PLEK2	TCONS_00001839	ENSAPLT00000015419
XLOC_001092	TCONS_00001840	PLEK2	ENSAPLT00000015419	ENSAPLT00000015419
XLOC_001092	TCONS_00001841	PLEK2	TCONS_00001841	ENSAPLT00000015419
XLOC_001093	TCONS_00001842	EIF2S1	ENSAPLT00000015641	ENSAPLT00000015641
XLOC_001093	TCONS_00001845	EIF2S1	TCONS_00001845	ENSAPLT00000015641
XLOC_001093	TCONS_00001844	EIF2S1	TCONS_00001844	ENSAPLT00000015641
XLOC_001093	TCONS_00001843	EIF2S1	TCONS_00001843	ENSAPLT00000015641
XLOC_001094	TCONS_00001846	MPP5	TCONS_00001846	ENSAPLT00000000929
XLOC_001094	TCONS_00001848	MPP5	ENSAPLT00000000929	ENSAPLT00000000929
XLOC_001094	TCONS_00001847	MPP5	TCONS_00001847	ENSAPLT00000000929
XLOC_001095	TCONS_00001849	ENSAPLG00000000648	ENSAPLT00000000621	ENSAPLT00000000621
XLOC_001096	TCONS_00001850	ENSAPLG00000002494	ENSAPLT00000002501	ENSAPLT00000002501
XLOC_001097	TCONS_00001851	GPHN	TCONS_00001851	ENSAPLT00000002583
XLOC_001097	TCONS_00001852	GPHN	TCONS_00001852	ENSAPLT00000002583
XLOC_001097	TCONS_00001853	GPHN	ENSAPLT00000002583	ENSAPLT00000002583
XLOC_001098	TCONS_00001854	XLOC_001098	TCONS_00001854
XLOC_001098	TCONS_00001855	XLOC_001098	TCONS_00001855
XLOC_001098	TCONS_00001856	XLOC_001098	TCONS_00001856
XLOC_001099	TCONS_00001857	XLOC_001099	TCONS_00001857
XLOC_001100	TCONS_00001858	EIF2AK4	TCONS_00001858	ENSAPLT00000003402
XLOC_001100	TCONS_00001859	EIF2AK4	ENSAPLT00000003402	ENSAPLT00000003402
XLOC_001101	TCONS_00001860	THBS1	TCONS_00001860	ENSAPLT00000004064
XLOC_001101	TCONS_00001861	THBS1	ENSAPLT00000004064	ENSAPLT00000004064
XLOC_001102	TCONS_00001862	CHRM5	ENSAPLT00000000634	ENSAPLT00000000634
XLOC_001103	TCONS_00001864	RYR3	TCONS_00001864	ENSAPLT00000005441
XLOC_001103	TCONS_00001863	RYR3	TCONS_00001863	ENSAPLT00000005441
XLOC_001103	TCONS_00001865	RYR3	ENSAPLT00000005441	ENSAPLT00000005441
XLOC_001104	TCONS_00001866	GREM1	ENSAPLT00000000640	ENSAPLT00000000640
XLOC_001105	TCONS_00001867	SCG5	ENSAPLT00000006499	ENSAPLT00000006499
XLOC_001105	TCONS_00001868	SCG5	TCONS_00001868	ENSAPLT00000006499
XLOC_001106	TCONS_00001869	ENSAPLG00000006312	ENSAPLT00000006558	ENSAPLT00000006558
XLOC_001106	TCONS_00001870	ENSAPLG00000006312	TCONS_00001870	ENSAPLT00000006558
XLOC_001107	TCONS_00001871	FAM98B	TCONS_00001871	ENSAPLT00000007146
XLOC_001107	TCONS_00001873	FAM98B	ENSAPLT00000007146	ENSAPLT00000007146
XLOC_001107	TCONS_00001872	FAM98B	TCONS_00001872	ENSAPLT00000007146
XLOC_001108	TCONS_00001874	SPRED1	ENSAPLT00000007254	ENSAPLT00000007254
XLOC_001108	TCONS_00001875	SPRED1	TCONS_00001875	ENSAPLT00000007254
XLOC_001109	TCONS_00001876	ENSAPLG00000007322	ENSAPLT00000007592	ENSAPLT00000007592
XLOC_001110	TCONS_00001877	XLOC_001110	TCONS_00001877
XLOC_001110	TCONS_00001878	XLOC_001110	TCONS_00001878
XLOC_001110	TCONS_00001879	XLOC_001110	TCONS_00001879
XLOC_001111	TCONS_00001880	C15orf41	TCONS_00001880	ENSAPLT00000007815
XLOC_001111	TCONS_00001881	C15orf41	ENSAPLT00000007815	ENSAPLT00000007815
XLOC_001112	TCONS_00001882	XLOC_001112	TCONS_00001882
XLOC_001113	TCONS_00001883	XLOC_001113	TCONS_00001883
XLOC_001114	TCONS_00001884	XLOC_001114	TCONS_00001884
XLOC_001114	TCONS_00001885	XLOC_001114	TCONS_00001885
XLOC_001114	TCONS_00001886	XLOC_001114	TCONS_00001886
XLOC_001115	TCONS_00001888	ZNF770	TCONS_00001888	ENSAPLT00000008432
XLOC_001115	TCONS_00001887	ZNF770	TCONS_00001887	ENSAPLT00000008432
XLOC_001115	TCONS_00001889	ZNF770	TCONS_00001889	ENSAPLT00000008432
XLOC_001115	TCONS_00001890	ZNF770	TCONS_00001890	ENSAPLT00000008432
XLOC_001116	TCONS_00001891	XLOC_001116	TCONS_00001891
XLOC_001117	TCONS_00001892	ENSAPLG00000006472	ENSAPLT00000006699	ENSAPLT00000006699
XLOC_001118	TCONS_00001893	XLOC_001118	TCONS_00001893
XLOC_001119	TCONS_00001894	PRKCE	TCONS_00001894	ENSAPLT00000006760
XLOC_001119	TCONS_00001895	PRKCE	ENSAPLT00000006760	ENSAPLT00000006760
XLOC_001119	TCONS_00001896	PRKCE	TCONS_00001896	ENSAPLT00000006760
XLOC_001119	TCONS_00001897	PRKCE	TCONS_00001897	ENSAPLT00000006760
XLOC_001120	TCONS_00001898	XLOC_001120	TCONS_00001898
XLOC_001121	TCONS_00001899	EPAS1	TCONS_00001899	ENSAPLT00000007487
XLOC_001121	TCONS_00001900	EPAS1	TCONS_00001900	ENSAPLT00000007487
XLOC_001121	TCONS_00001901	EPAS1	ENSAPLT00000007487	ENSAPLT00000007487
XLOC_001122	TCONS_00001902	ENSAPLG00000001956	ENSAPLT00000001950	ENSAPLT00000001950
XLOC_001123	TCONS_00001903	PIGF	TCONS_00001903	ENSAPLT00000007819
XLOC_001124	TCONS_00001904	CRIPT	ENSAPLT00000007891	ENSAPLT00000007891
XLOC_001125	TCONS_00001905	SOCS5	TCONS_00001905	ENSAPLT00000001969
XLOC_001125	TCONS_00001906	SOCS5	TCONS_00001906	ENSAPLT00000001969
XLOC_001125	TCONS_00001907	SOCS5	ENSAPLT00000001969	ENSAPLT00000001969
XLOC_001126	TCONS_00001908	XLOC_001126	TCONS_00001908
XLOC_001126	TCONS_00001909	XLOC_001126	TCONS_00001909
XLOC_001127	TCONS_00001911	XLOC_001127	TCONS_00001911
XLOC_001127	TCONS_00001910	XLOC_001127	TCONS_00001910
XLOC_001128	TCONS_00001912	TTC7A	TCONS_00001912	ENSAPLT00000007950
XLOC_001129	TCONS_00001913	TTC7A	ENSAPLT00000007950	ENSAPLT00000007950
XLOC_001129	TCONS_00001914	TTC7A	ENSAPLT00000007960	ENSAPLT00000007960
XLOC_001130	TCONS_00001915	XLOC_001130	TCONS_00001915
XLOC_001131	TCONS_00001916	SRBD1	ENSAPLT00000006571	ENSAPLT00000006571
XLOC_001131	TCONS_00001917	SRBD1	TCONS_00001917	ENSAPLT00000006571
XLOC_001131	TCONS_00001918	SRBD1	TCONS_00001918	ENSAPLT00000006571
XLOC_001132	TCONS_00001919	XLOC_001132	TCONS_00001919
XLOC_001133	TCONS_00001920	XLOC_001133	TCONS_00001920
XLOC_001133	TCONS_00001921	XLOC_001133	TCONS_00001921
XLOC_001134	TCONS_00001922	ENSAPLG00000001954	TCONS_00001922	ENSAPLT00000001947
XLOC_001134	TCONS_00001923	ENSAPLG00000001954	TCONS_00001923	ENSAPLT00000001947
XLOC_001134	TCONS_00001924	ENSAPLG00000001954	ENSAPLT00000001947	ENSAPLT00000001947
XLOC_001135	TCONS_00001925	XLOC_001135	TCONS_00001925
XLOC_001136	TCONS_00001926	PIGF	TCONS_00001926	ENSAPLT00000007819
XLOC_001136	TCONS_00001927	PIGF	ENSAPLT00000007819	ENSAPLT00000007819
XLOC_001137	TCONS_00001928	MCFD2	ENSAPLT00000008200	ENSAPLT00000008200
XLOC_001137	TCONS_00001929	MCFD2	TCONS_00001929	ENSAPLT00000008200
XLOC_001138	TCONS_00001930	CALM2	ENSAPLT00000008282	ENSAPLT00000008282
XLOC_001139	TCONS_00001931	XLOC_001139	TCONS_00001931
XLOC_001140	TCONS_00001932	ENSAPLG00000008366	ENSAPLT00000008684	ENSAPLT00000008684
XLOC_001141	TCONS_00001933	XLOC_001141	TCONS_00001933
XLOC_001142	TCONS_00001934	PPP1CB	ENSAPLT00000008727	ENSAPLT00000008727
XLOC_001143	TCONS_00001935	PLB1	TCONS_00001935	ENSAPLT00000008888
XLOC_001143	TCONS_00001936	PLB1	ENSAPLT00000008888	ENSAPLT00000008888
XLOC_001143	TCONS_00001938	PLB1	TCONS_00001938	ENSAPLT00000008888
XLOC_001143	TCONS_00001937	PLB1	TCONS_00001937	ENSAPLT00000008888
XLOC_001144	TCONS_00001939	FOSL2	ENSAPLT00000009573	ENSAPLT00000009573
XLOC_001145	TCONS_00001940	XLOC_001145	TCONS_00001940
XLOC_001146	TCONS_00001941	ARPC5	TCONS_00001941	ENSAPLT00000015550
XLOC_001146	TCONS_00001942	ARPC5	TCONS_00001942	ENSAPLT00000015550
XLOC_001146	TCONS_00001943	ARPC5	ENSAPLT00000015550	ENSAPLT00000015550
XLOC_001147	TCONS_00001944	NCF2	TCONS_00001944	ENSAPLT00000015685
XLOC_001147	TCONS_00001947	NCF2	ENSAPLT00000015685	ENSAPLT00000015685
XLOC_001147	TCONS_00001946	NCF2	TCONS_00001946	ENSAPLT00000015685
XLOC_001147	TCONS_00001945	NCF2	TCONS_00001945	ENSAPLT00000015685
XLOC_001148	TCONS_00001948	NMNAT2	ENSAPLT00000001122	ENSAPLT00000001122
XLOC_001149	TCONS_00001949	HEBP2	TCONS_00001949	ENSAPLT00000004977
XLOC_001149	TCONS_00001950	HEBP2	ENSAPLT00000004977	ENSAPLT00000004977
XLOC_001150	TCONS_00001951	SNORD78	TCONS_00001951	ENSAPLT00000000275
XLOC_001151	TCONS_00001952	ZBTB37	TCONS_00001952	ENSAPLT00000005034
XLOC_001151	TCONS_00001953	ZBTB37	ENSAPLT00000005034	ENSAPLT00000005034
XLOC_001152	TCONS_00001954	XLOC_001152	TCONS_00001954
XLOC_001152	TCONS_00001955	XLOC_001152	TCONS_00001955
XLOC_001153	TCONS_00001956	RABGAP1L	TCONS_00001956	ENSAPLT00000006207
XLOC_001153	TCONS_00001957	RABGAP1L	ENSAPLT00000006207	ENSAPLT00000006207
XLOC_001154	TCONS_00001958	BRINP3	ENSAPLT00000015094	ENSAPLT00000015094
XLOC_001154	TCONS_00001959	BRINP3	TCONS_00001959	ENSAPLT00000015094
XLOC_001155	TCONS_00001960	XLOC_001155	TCONS_00001960
XLOC_001156	TCONS_00001961	XLOC_001156	TCONS_00001961
XLOC_001157	TCONS_00001962	ENSAPLG00000014667	TCONS_00001962	ENSAPLT00000015295
XLOC_001157	TCONS_00001963	ENSAPLG00000014667	TCONS_00001963	ENSAPLT00000015295
XLOC_001157	TCONS_00001964	ENSAPLG00000014667	ENSAPLT00000015295	ENSAPLT00000015295
XLOC_001158	TCONS_00001965	SMG7	ENSAPLT00000016529	ENSAPLT00000016529
XLOC_001159	TCONS_00001966	LAMC2	ENSAPLT00000002593	ENSAPLT00000002593
XLOC_001159	TCONS_00001968	LAMC2	TCONS_00001968	ENSAPLT00000002593
XLOC_001159	TCONS_00001967	LAMC2	TCONS_00001967	ENSAPLT00000002593
XLOC_001159	TCONS_00001969	LAMC2	TCONS_00001969	ENSAPLT00000002593
XLOC_001160	TCONS_00001970	LAMC1	TCONS_00001970	ENSAPLT00000003443
XLOC_001160	TCONS_00001972	LAMC1	ENSAPLT00000003443	ENSAPLT00000003443
XLOC_001160	TCONS_00001971	LAMC1	TCONS_00001971	ENSAPLT00000003443
XLOC_001161	TCONS_00001973	XLOC_001161	TCONS_00001973
XLOC_001162	TCONS_00001974	NPL	ENSAPLT00000004292	ENSAPLT00000004292
XLOC_001162	TCONS_00001975	NPL	TCONS_00001975	ENSAPLT00000004292
XLOC_001163	TCONS_00001976	SNORD79	ENSAPLT00000000427	ENSAPLT00000000427
XLOC_001164	TCONS_00001977	SNORD78	ENSAPLT00000000275	ENSAPLT00000000275
XLOC_001165	TCONS_00001978	snosnR60_Z15	ENSAPLT00000000225	ENSAPLT00000000225
XLOC_001166	TCONS_00001979	snosnR60_Z15	ENSAPLT00000000202	ENSAPLT00000000202
XLOC_001167	TCONS_00001980	SNORD24	ENSAPLT00000000465	ENSAPLT00000000465
XLOC_001168	TCONS_00001981	SNORD75	ENSAPLT00000000320	ENSAPLT00000000320
XLOC_001169	TCONS_00001982	SERPINC1	ENSAPLT00000005105	ENSAPLT00000005105
XLOC_001170	TCONS_00001983	RC3H1	ENSAPLT00000005553	ENSAPLT00000005553
XLOC_001170	TCONS_00001984	RC3H1	TCONS_00001984	ENSAPLT00000005553
XLOC_001171	TCONS_00001985	XLOC_001171	TCONS_00001985
XLOC_001172	TCONS_00001988	CACNA1E	ENSAPLT00000012181	ENSAPLT00000012181
XLOC_001172	TCONS_00001987	CACNA1E	TCONS_00001987	ENSAPLT00000012181
XLOC_001172	TCONS_00001986	CACNA1E	TCONS_00001986	ENSAPLT00000012181
XLOC_001172	TCONS_00001989	CACNA1E	TCONS_00001989	ENSAPLT00000012181
XLOC_001172	TCONS_00001990	CACNA1E	TCONS_00001990	ENSAPLT00000012181
XLOC_001173	TCONS_00001991	MYO18A	ENSAPLT00000015221	ENSAPLT00000015221
XLOC_001173	TCONS_00001992	MYO18A	TCONS_00001992	ENSAPLT00000015221
XLOC_001173	TCONS_00001994	MYO18A	TCONS_00001994	ENSAPLT00000015221
XLOC_001173	TCONS_00001993	MYO18A	TCONS_00001993	ENSAPLT00000015221
XLOC_001174	TCONS_00001995	ERAL1	ENSAPLT00000015544	ENSAPLT00000015544
XLOC_001175	TCONS_00001996	ENSAPLG00000002238	ENSAPLT00000002237	ENSAPLT00000002237
XLOC_001176	TCONS_00001997	ENSAPLG00000015317	ENSAPLT00000015952	ENSAPLT00000015952
XLOC_001177	TCONS_00001999	PHF12	ENSAPLT00000015990	ENSAPLT00000015990
XLOC_001177	TCONS_00001998	PHF12	TCONS_00001998	ENSAPLT00000015990
XLOC_001178	TCONS_00002000	ENSAPLG00000015789	ENSAPLT00000016452	ENSAPLT00000016452
[truncated: 38,551 more rows]
